# Supplementary material for: Intramolecular hydride transfer onto arynes: redox-neutral and transition metal-free C(sp3)–H functionalization of amines
Source: PubMed Central journal article supplement — Chem Sci. 2018 Feb 8;9(11):2873–8. doi: 10.1039/c8sc00181b (PMC5914459; doi:10.1039/c8sc00181b), 2018-02-08

## 6. NMR spectra

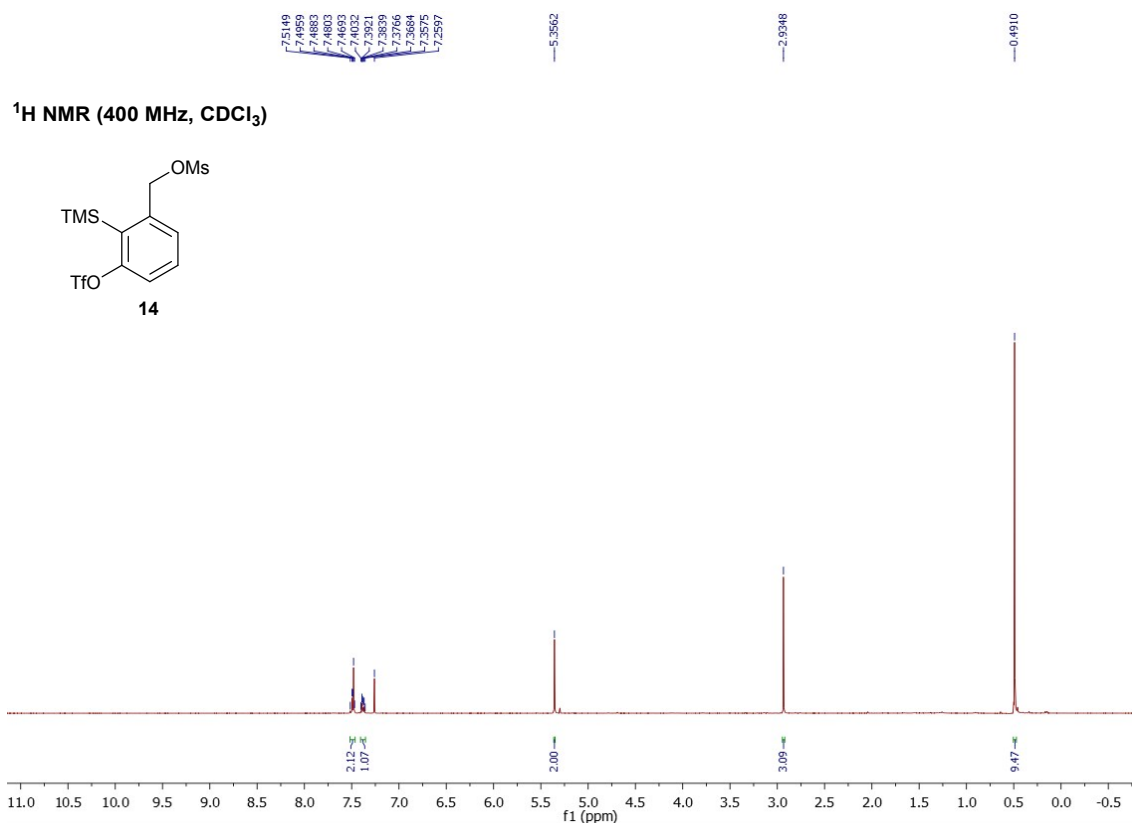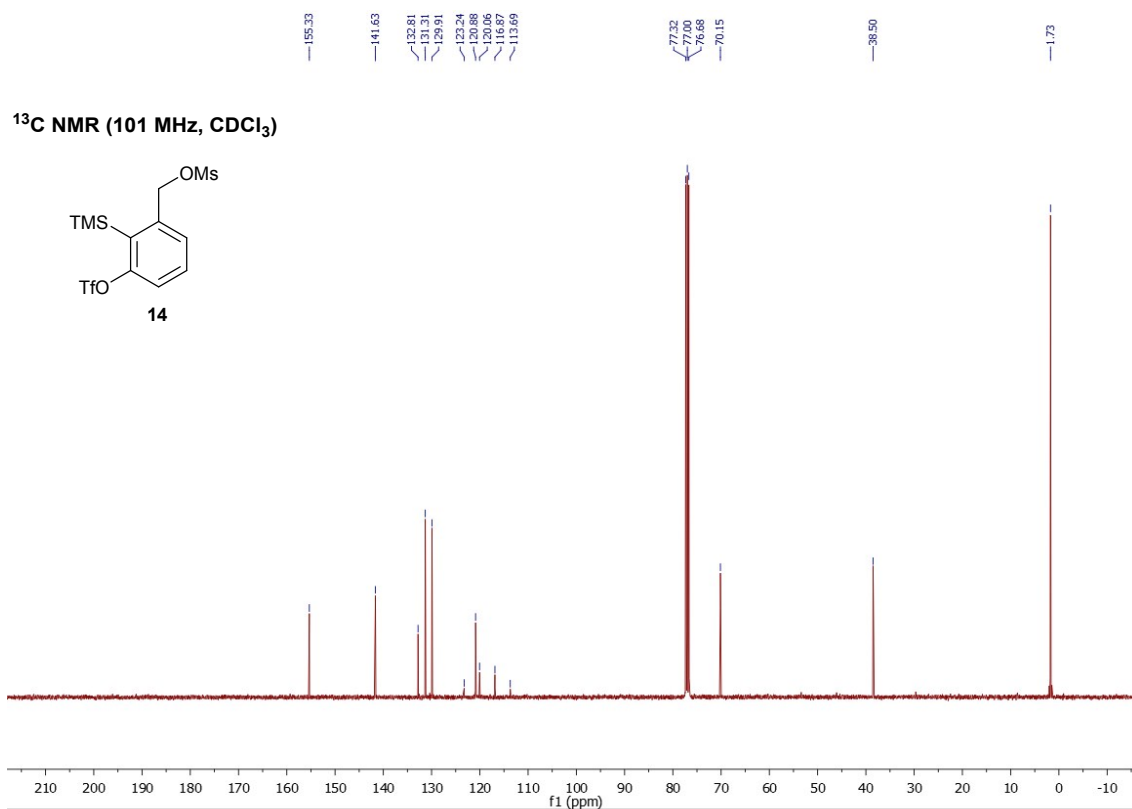

**<sup>1</sup>H NMR (400 MHz, CDCl<sub>3</sub>)**

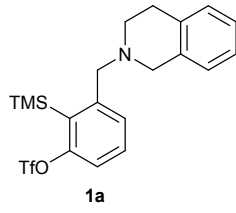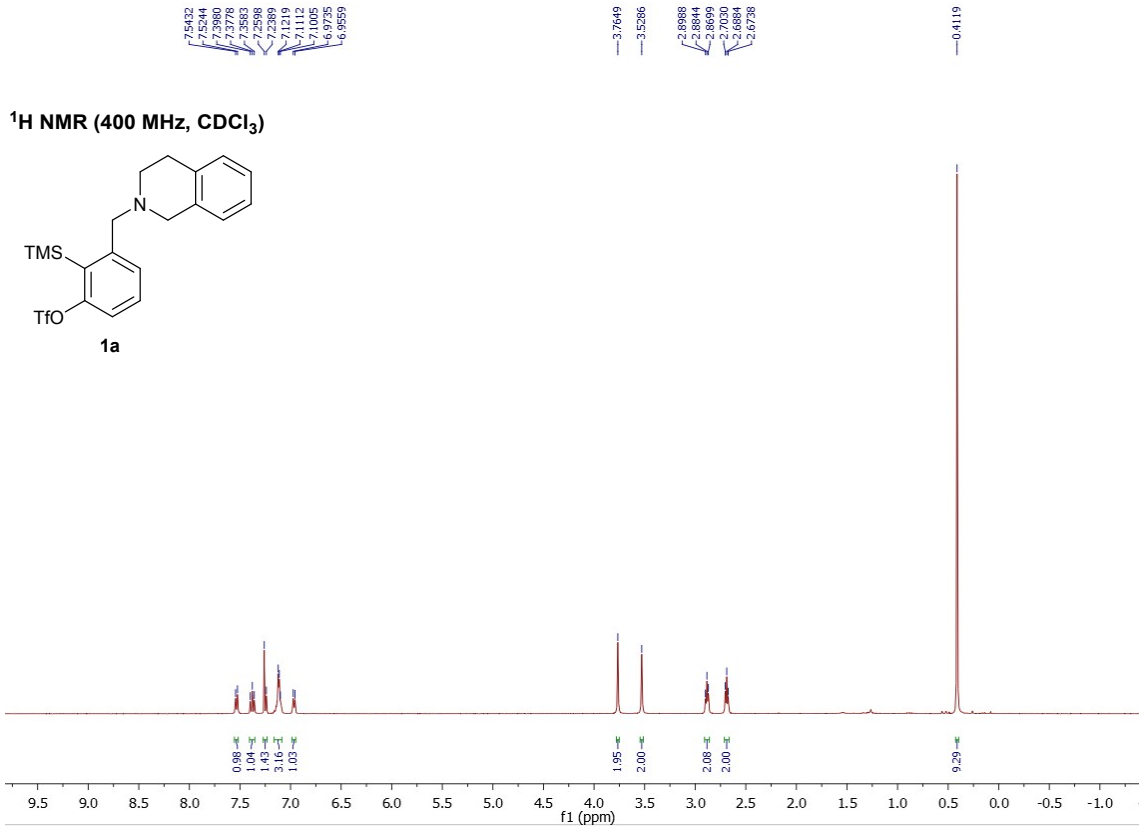

**<sup>13</sup>C NMR (101 MHz, CDCl<sub>3</sub>)**

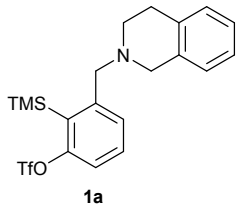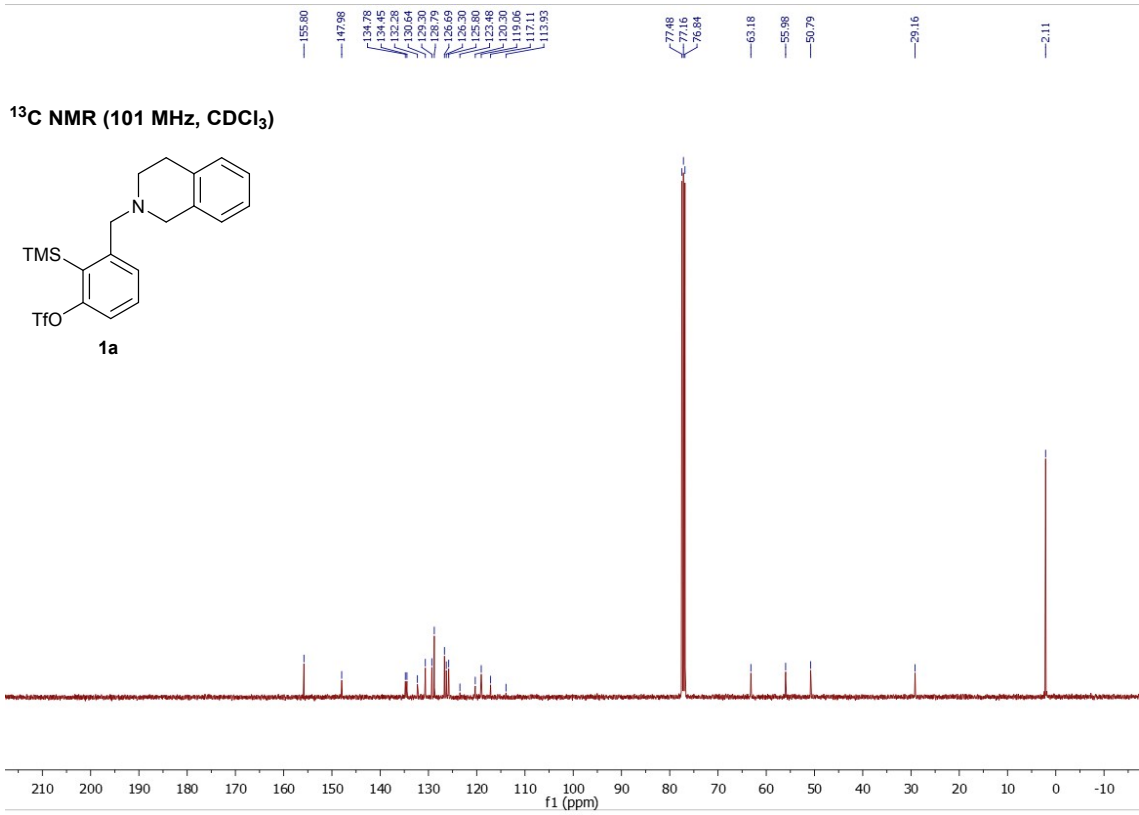

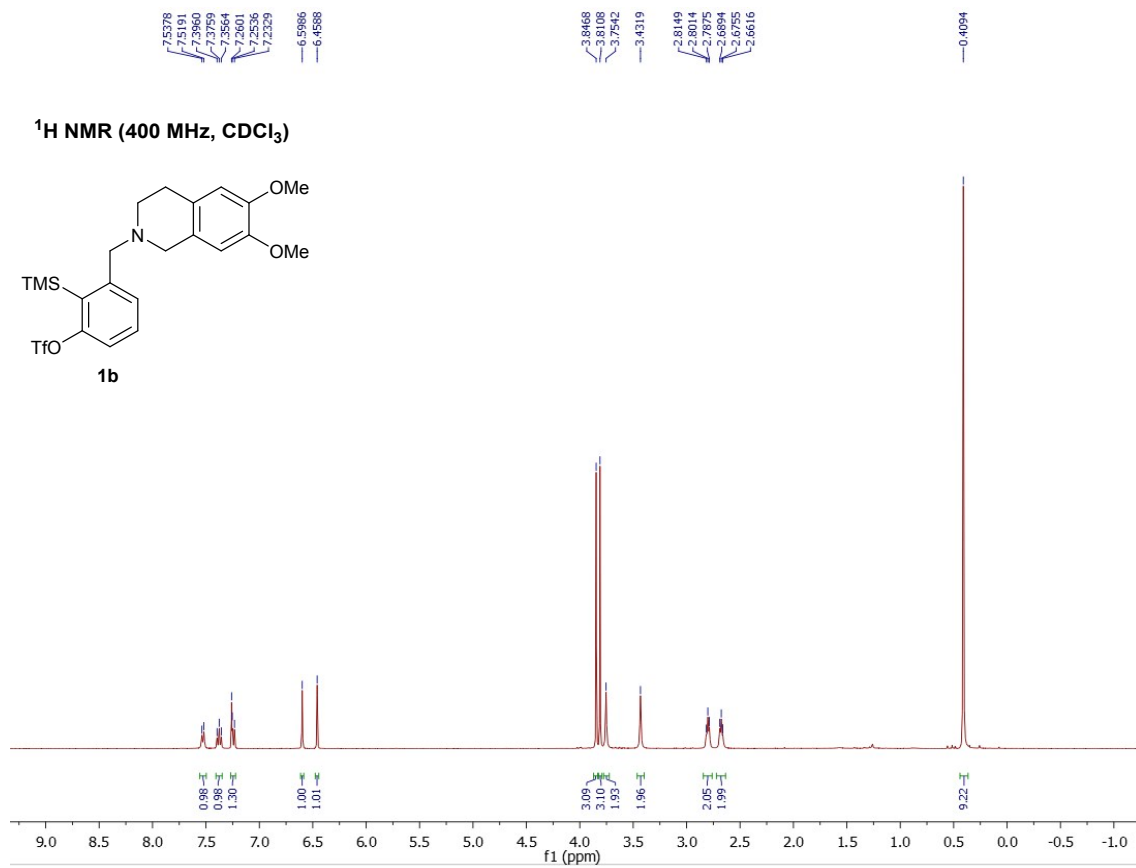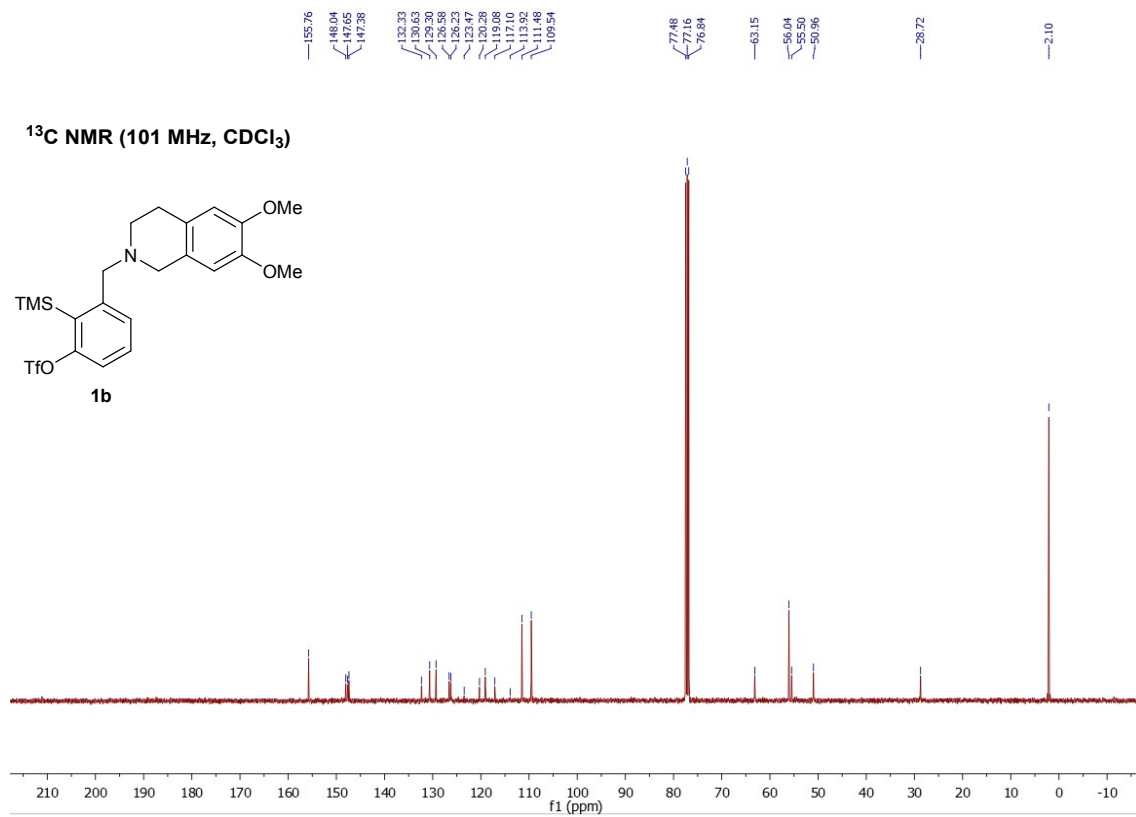

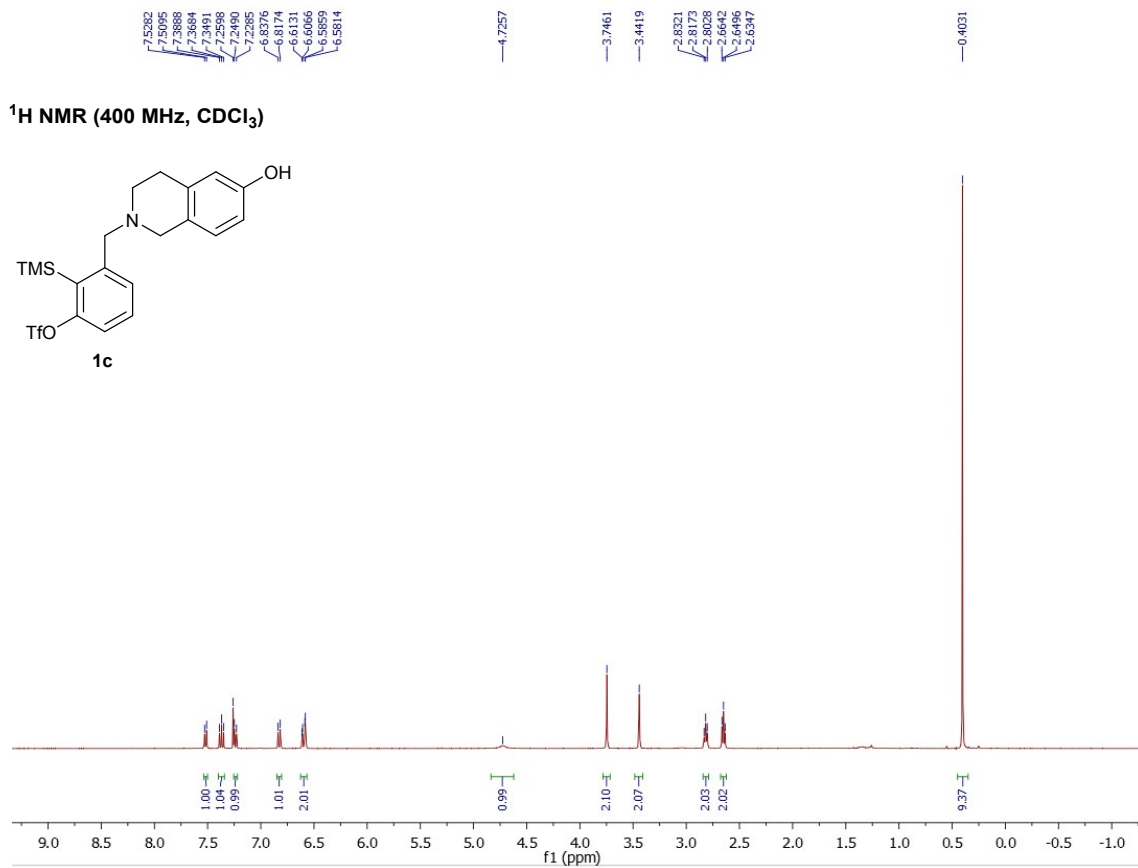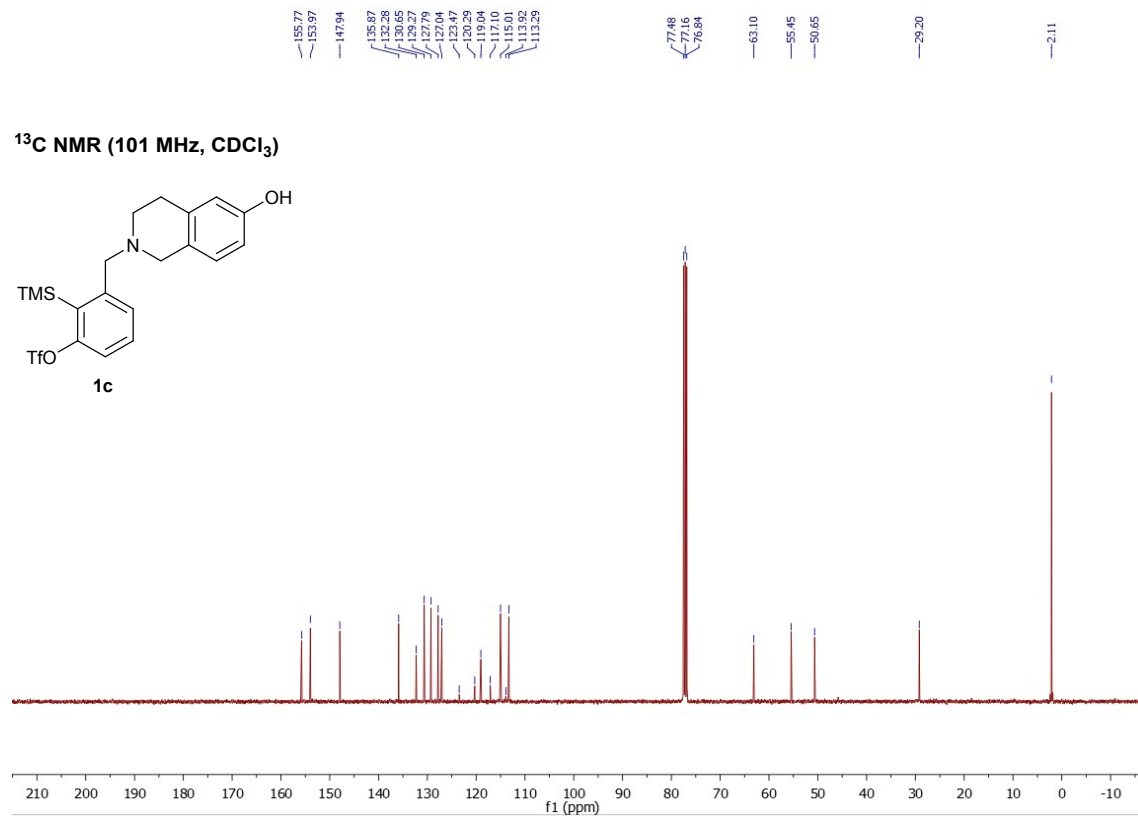

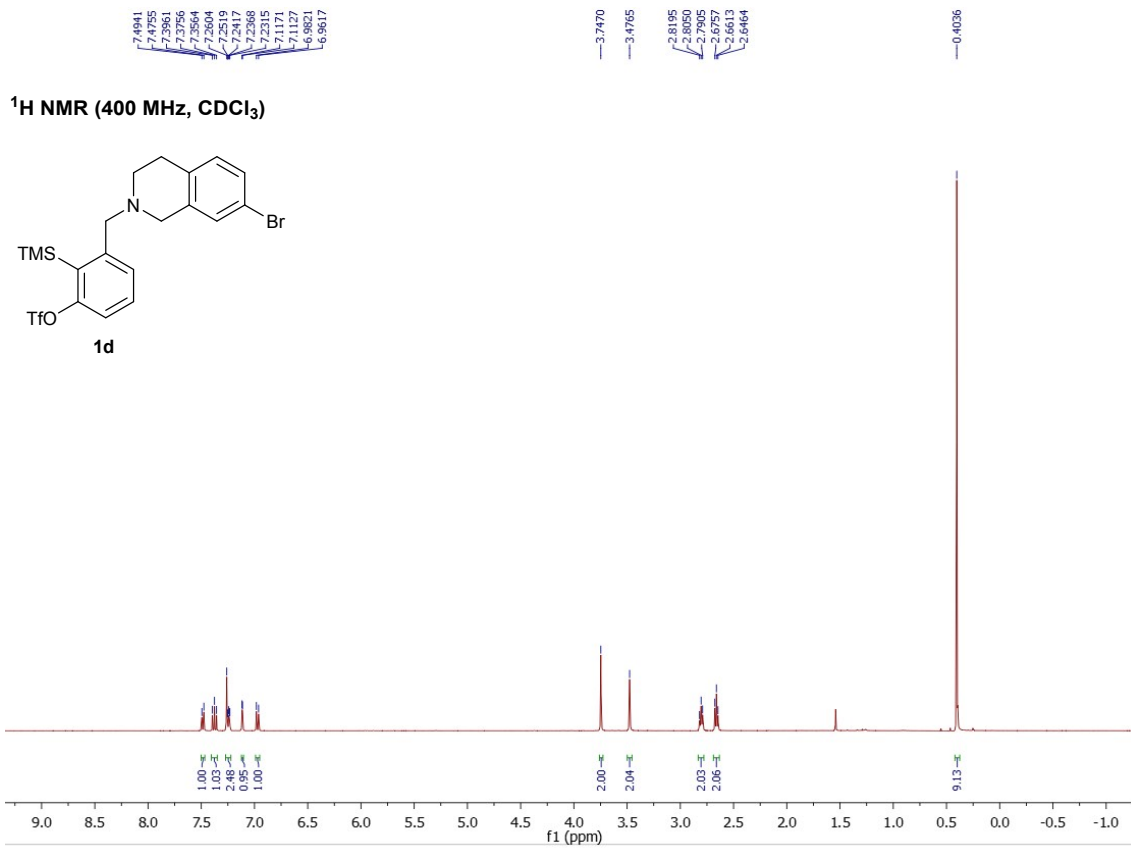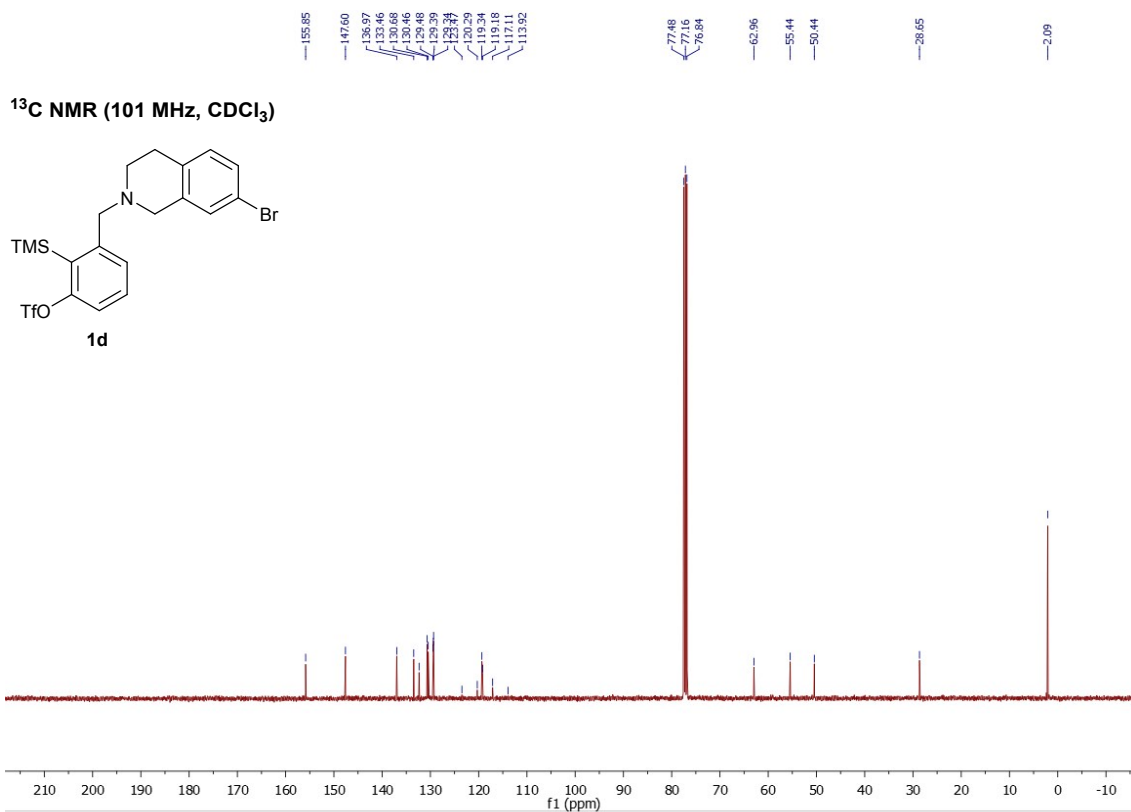

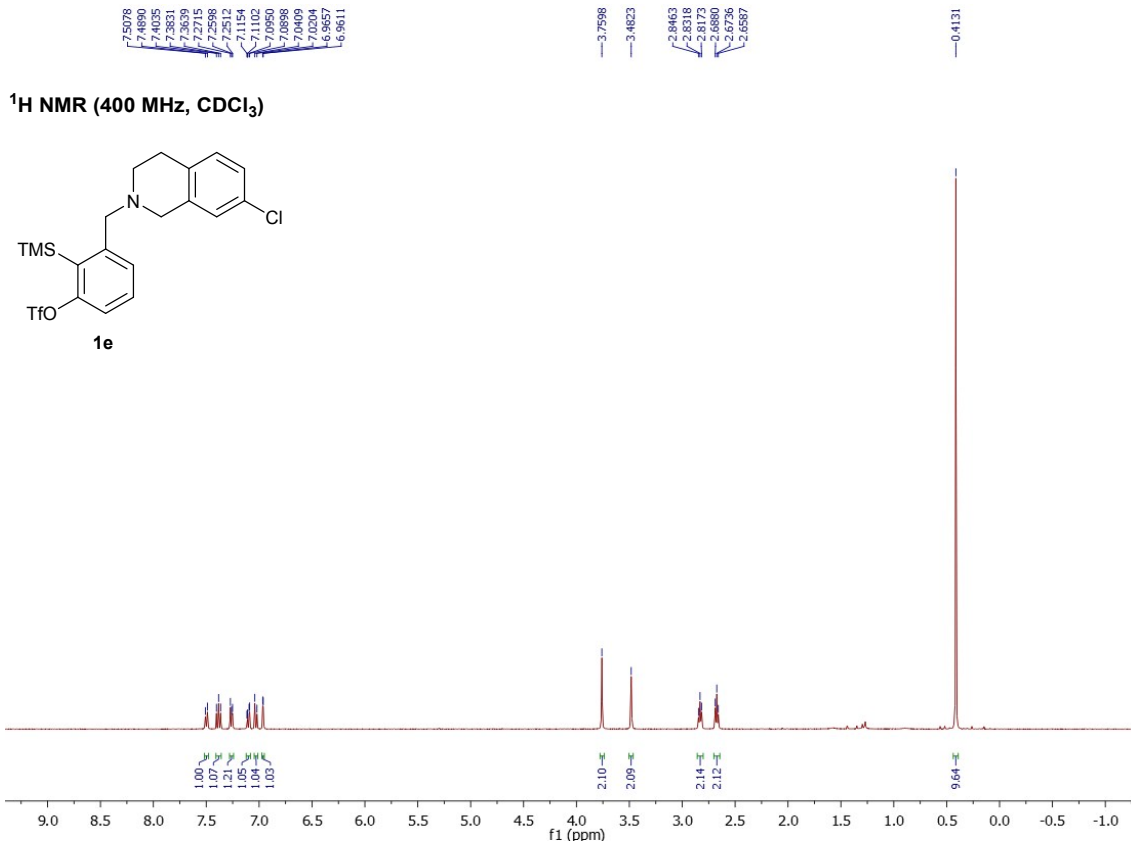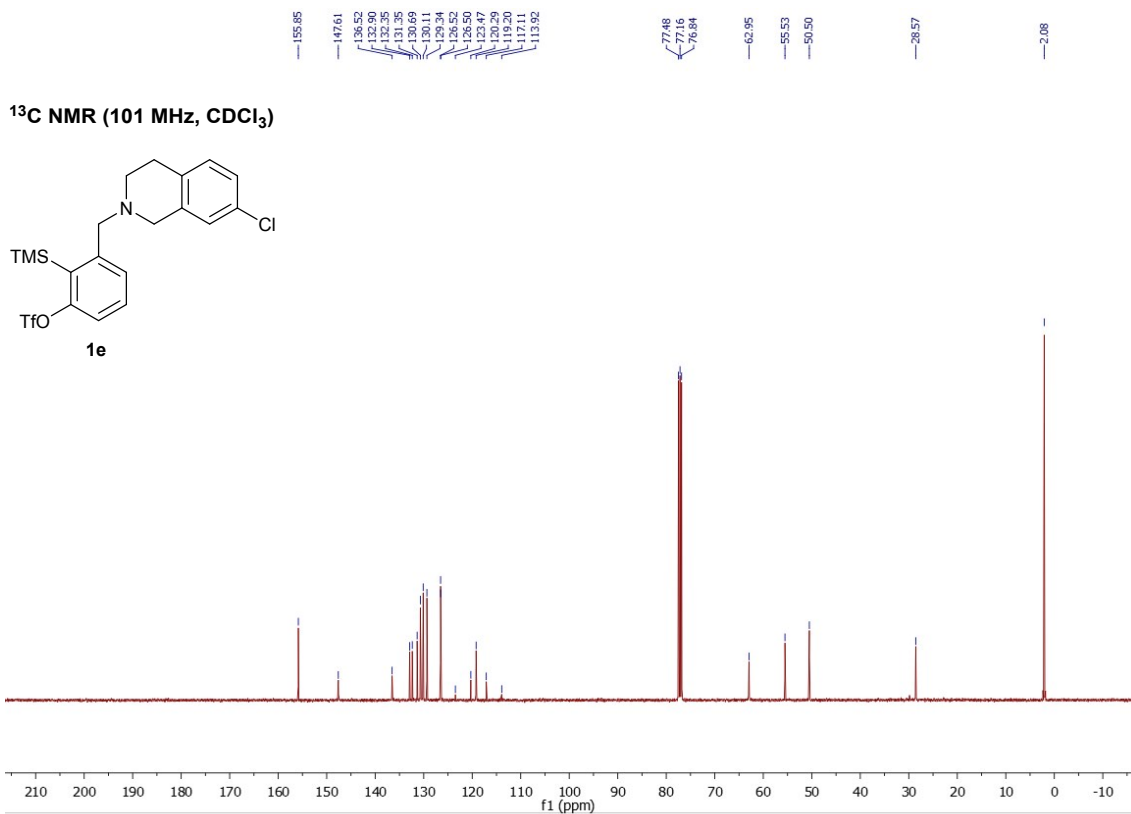

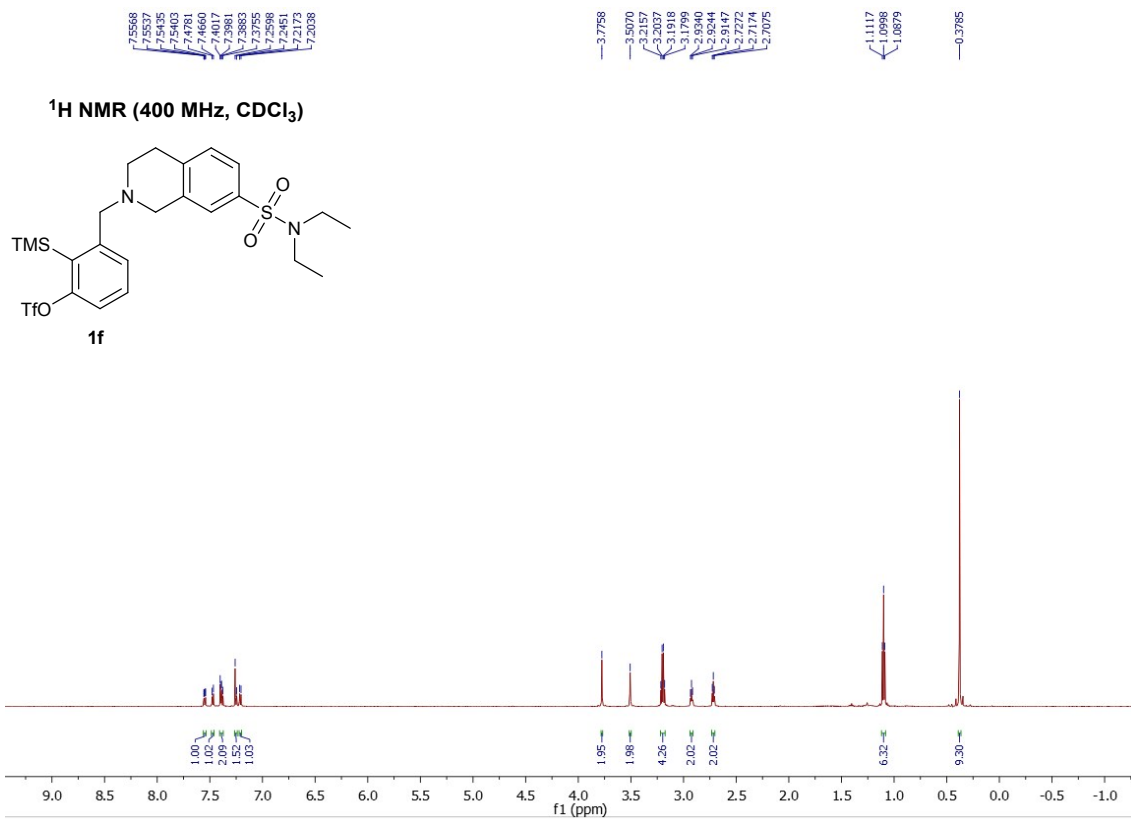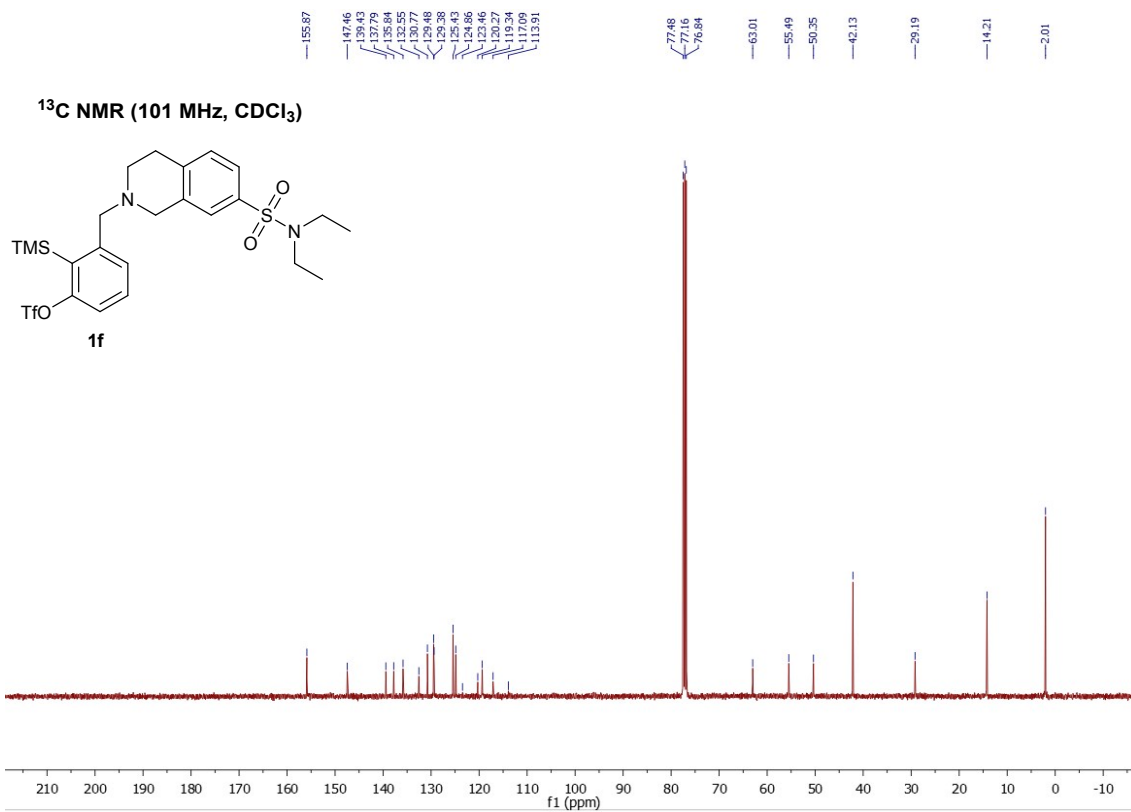

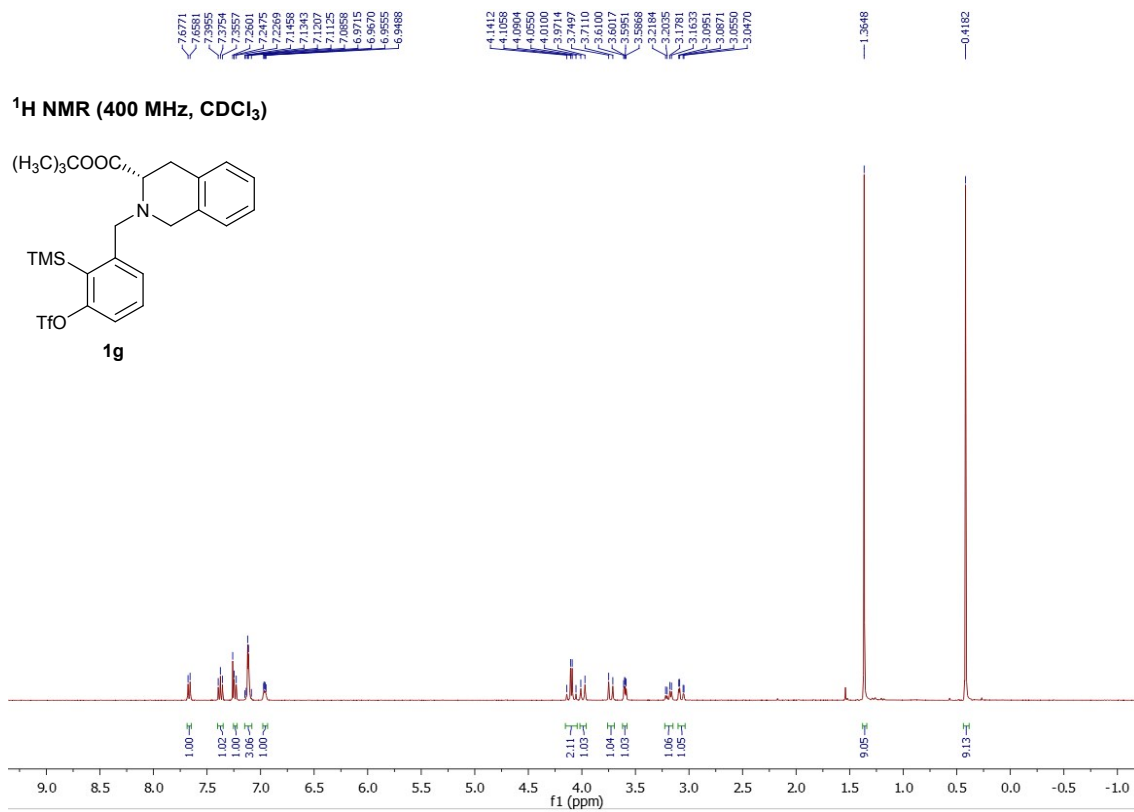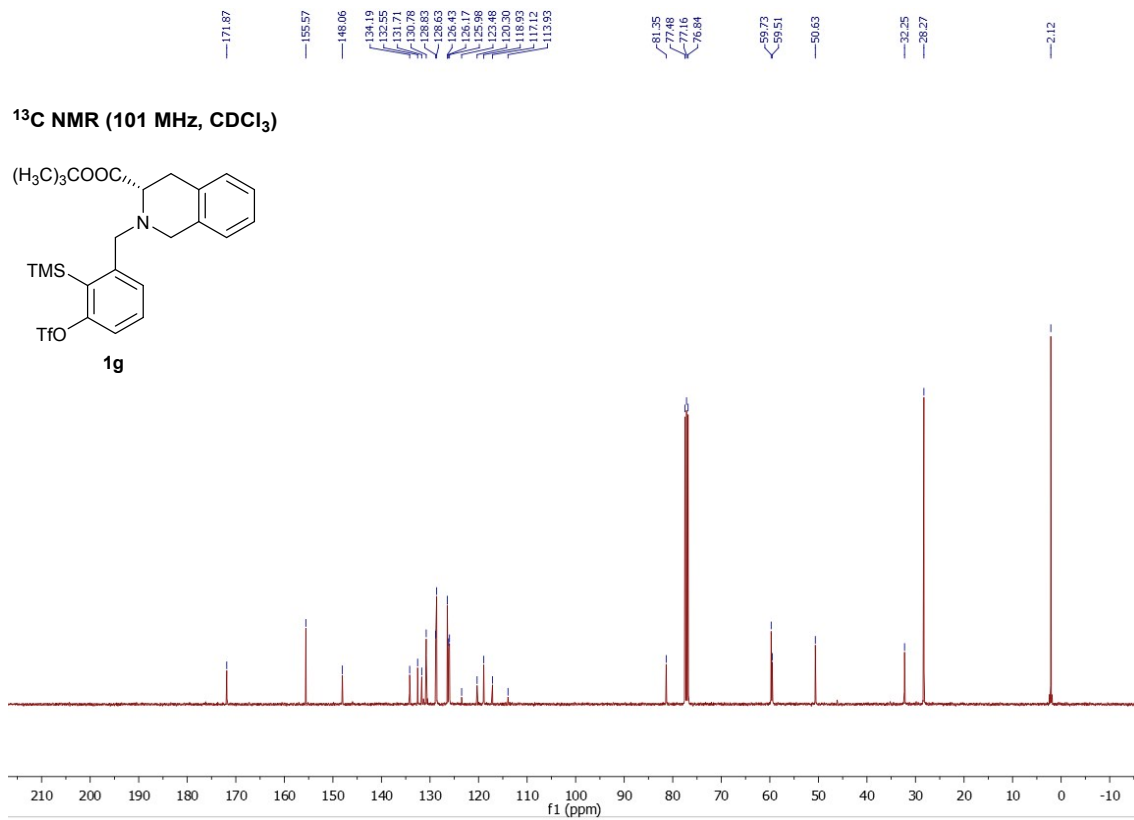



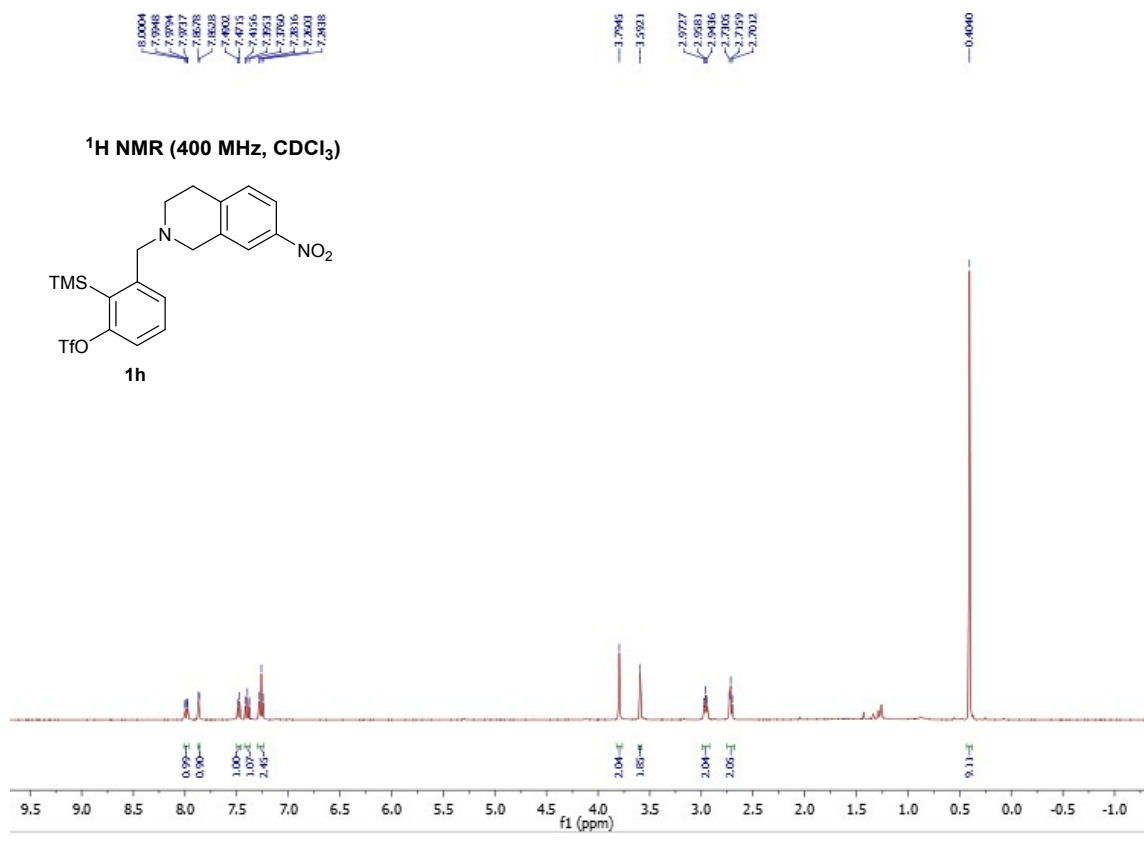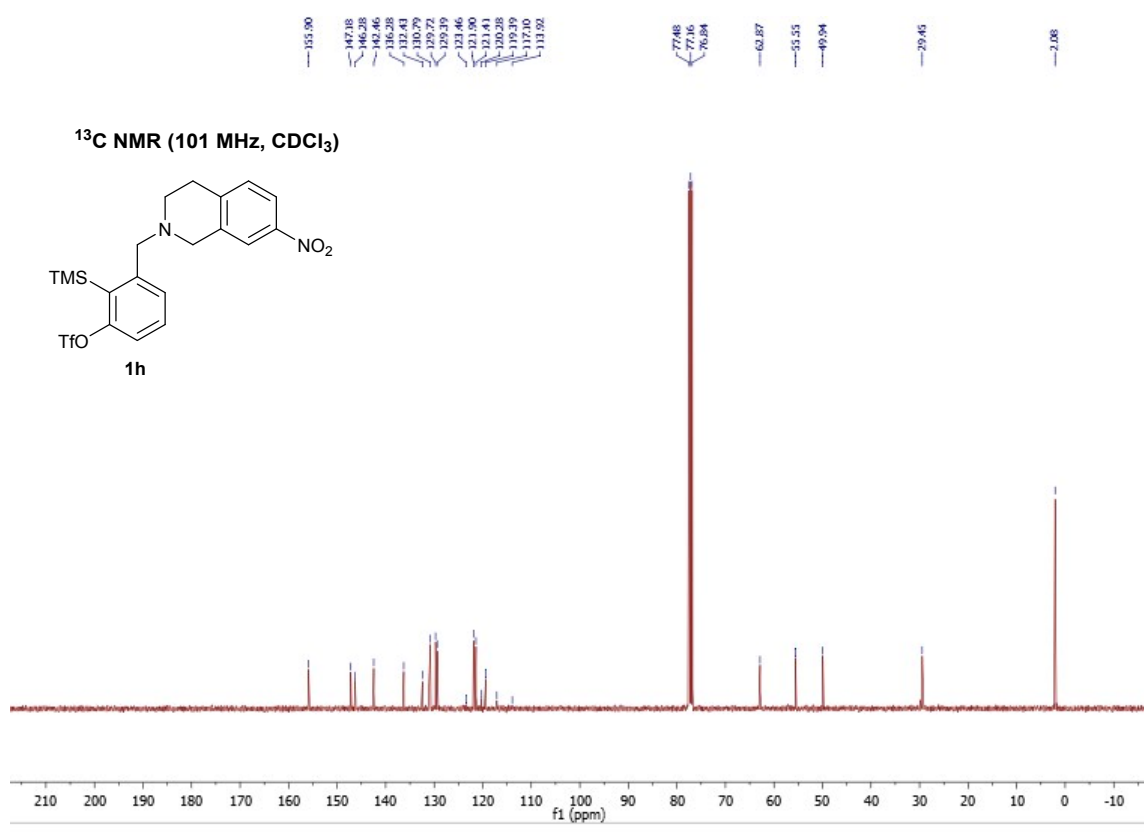

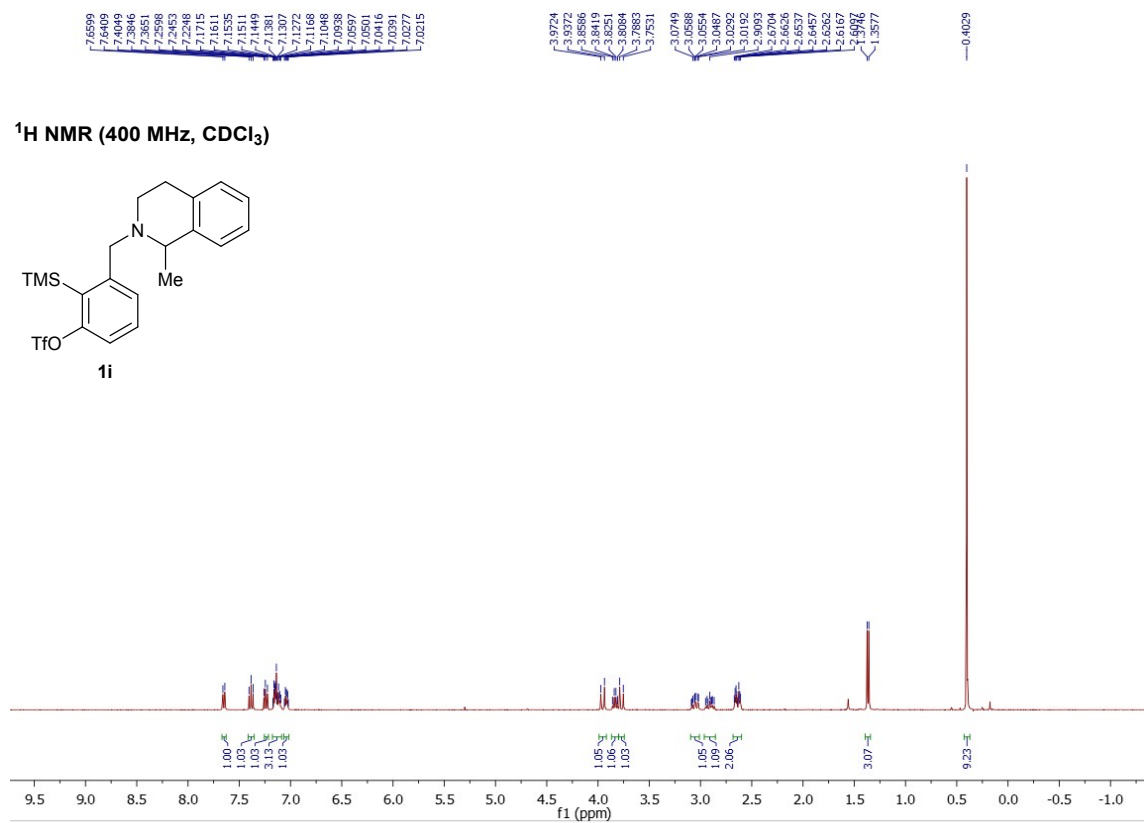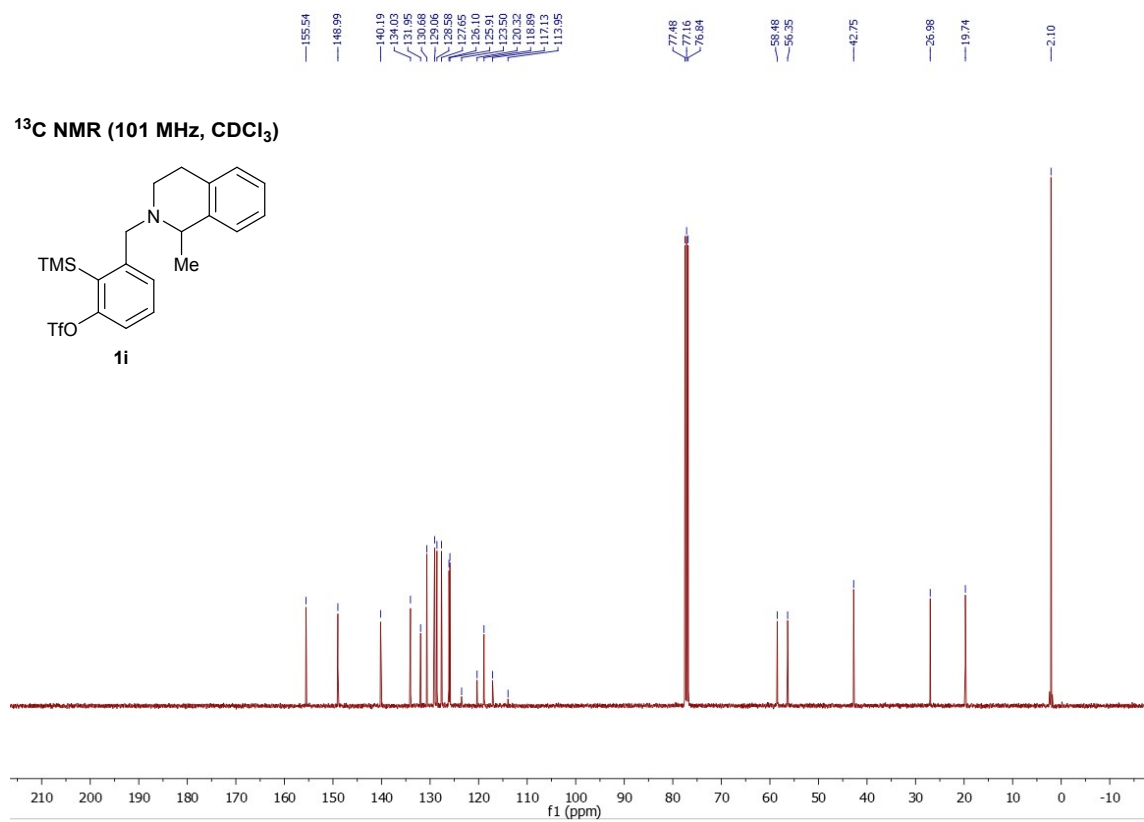

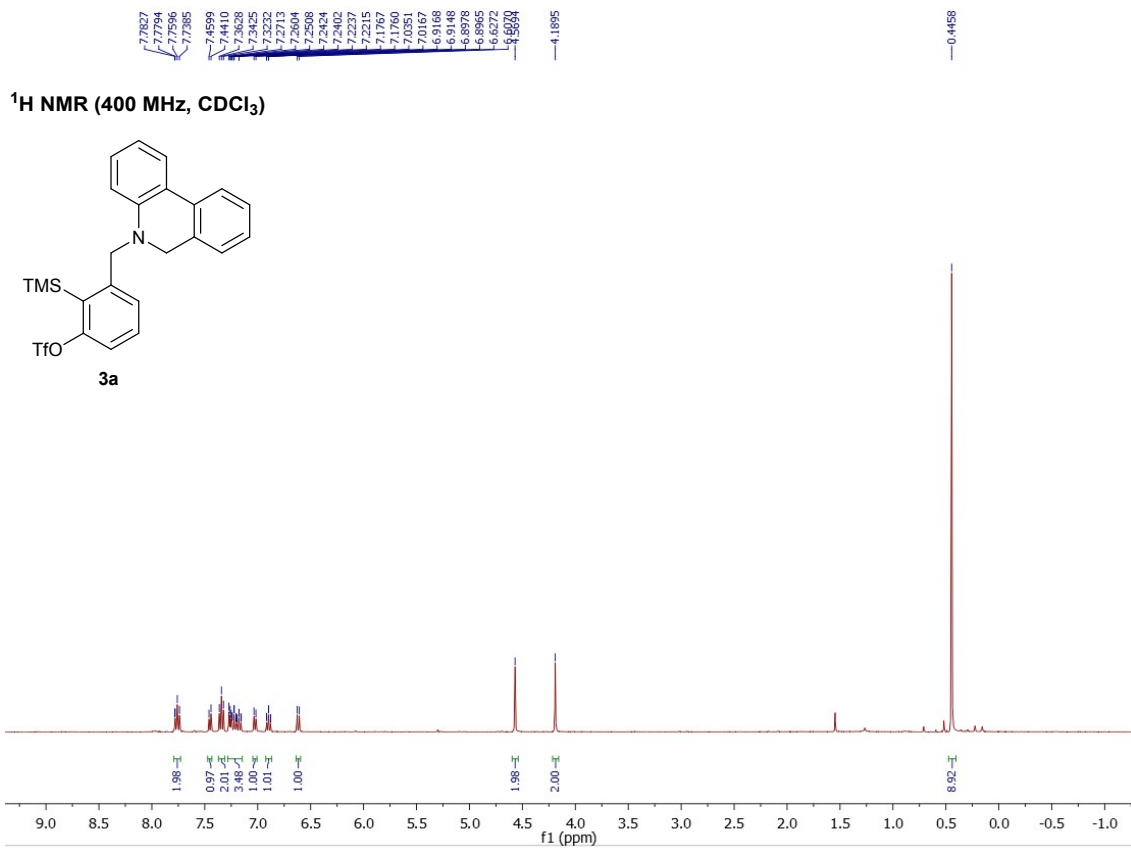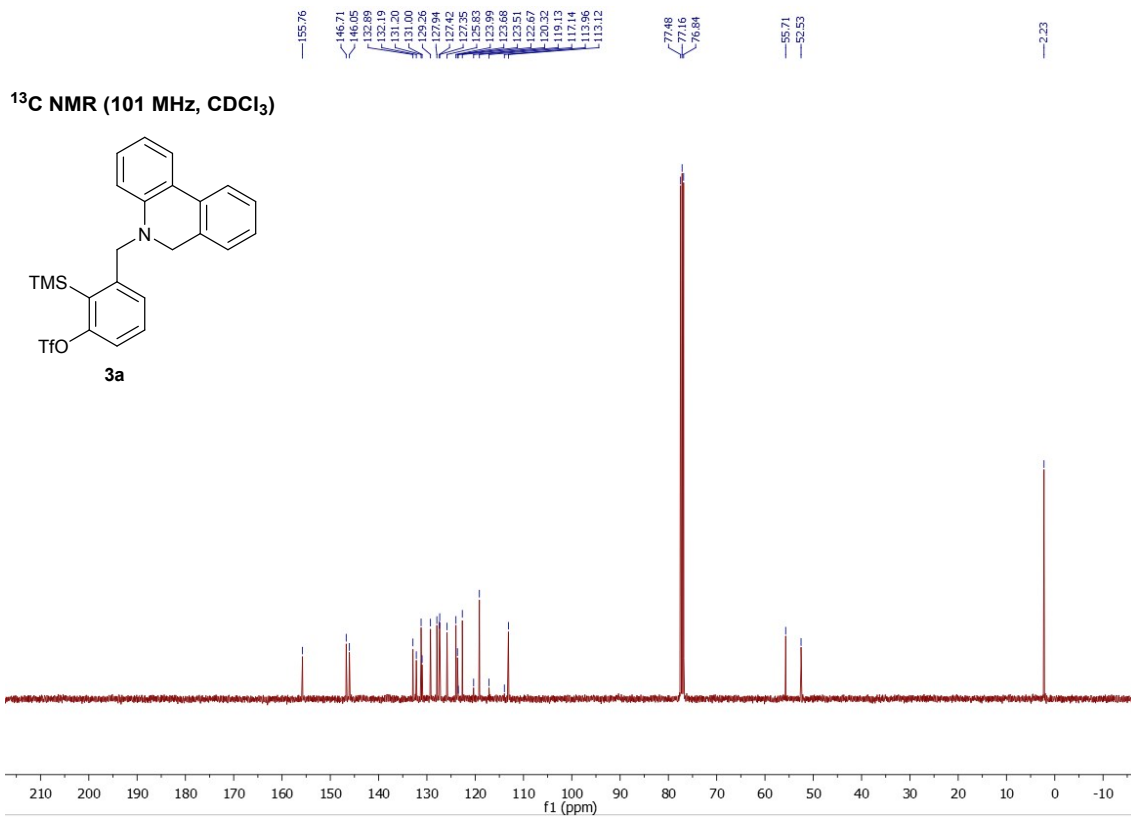

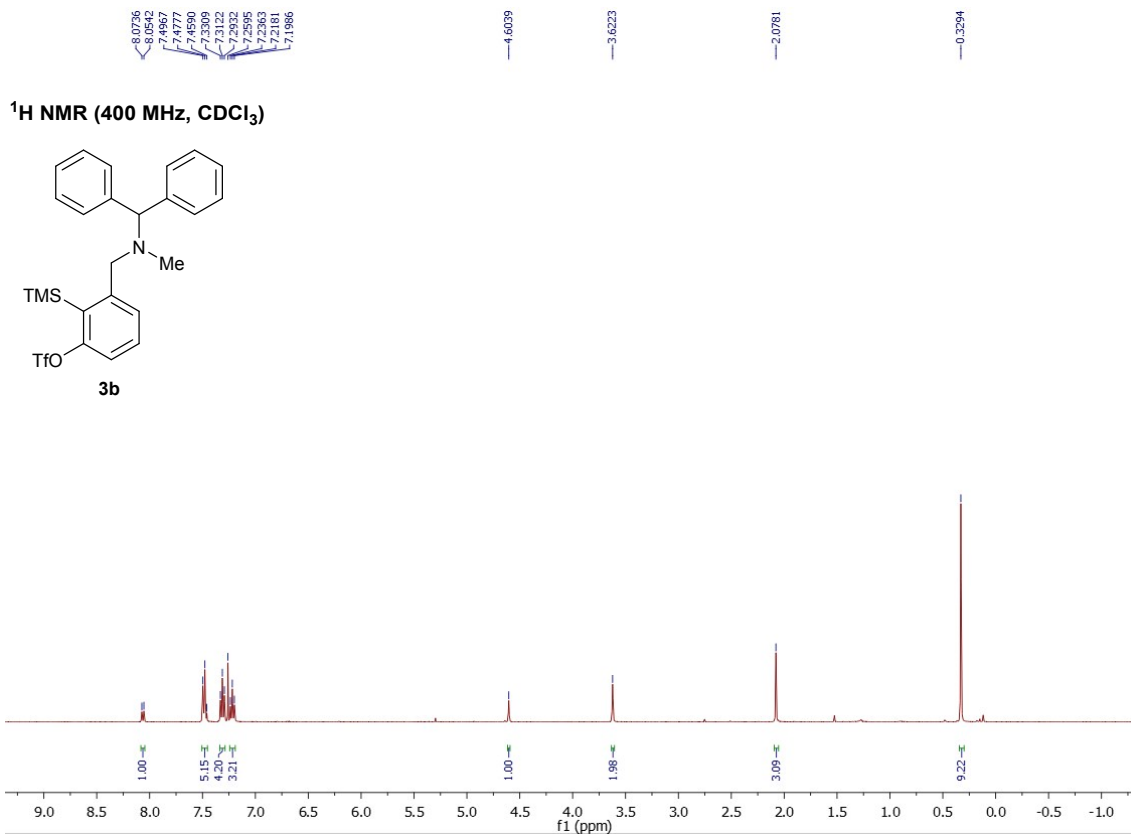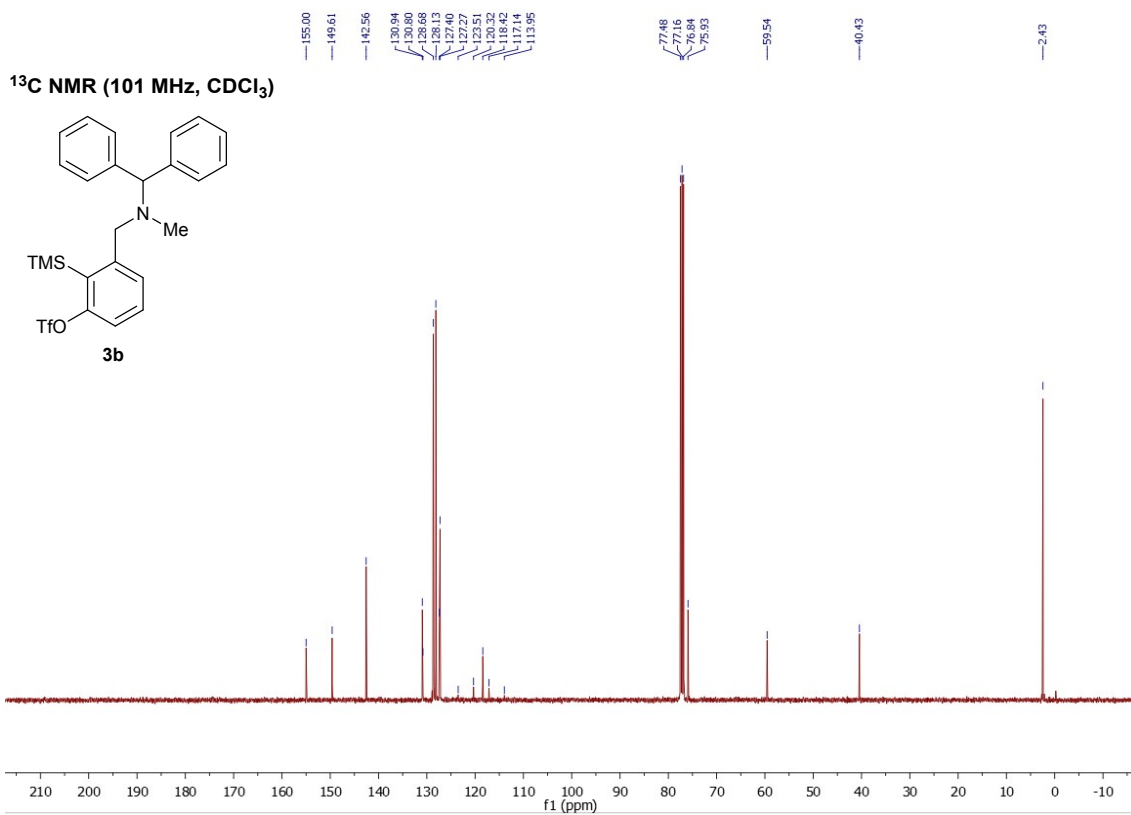

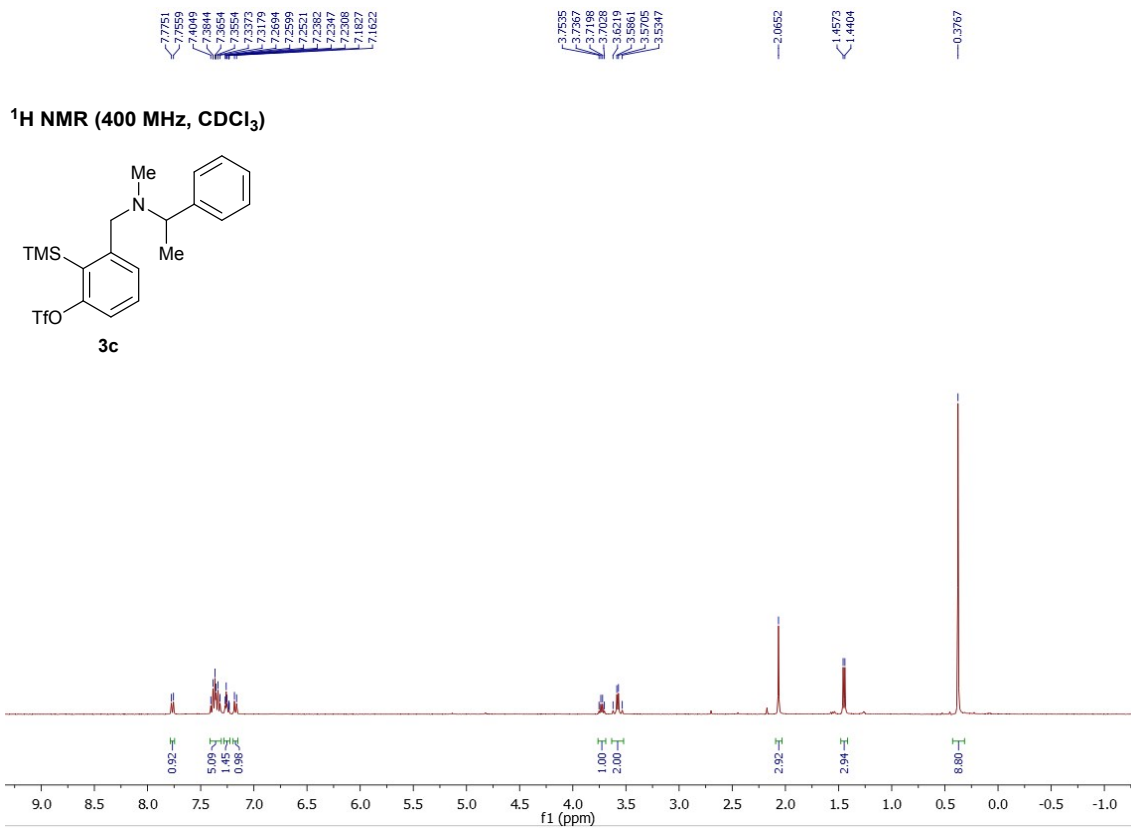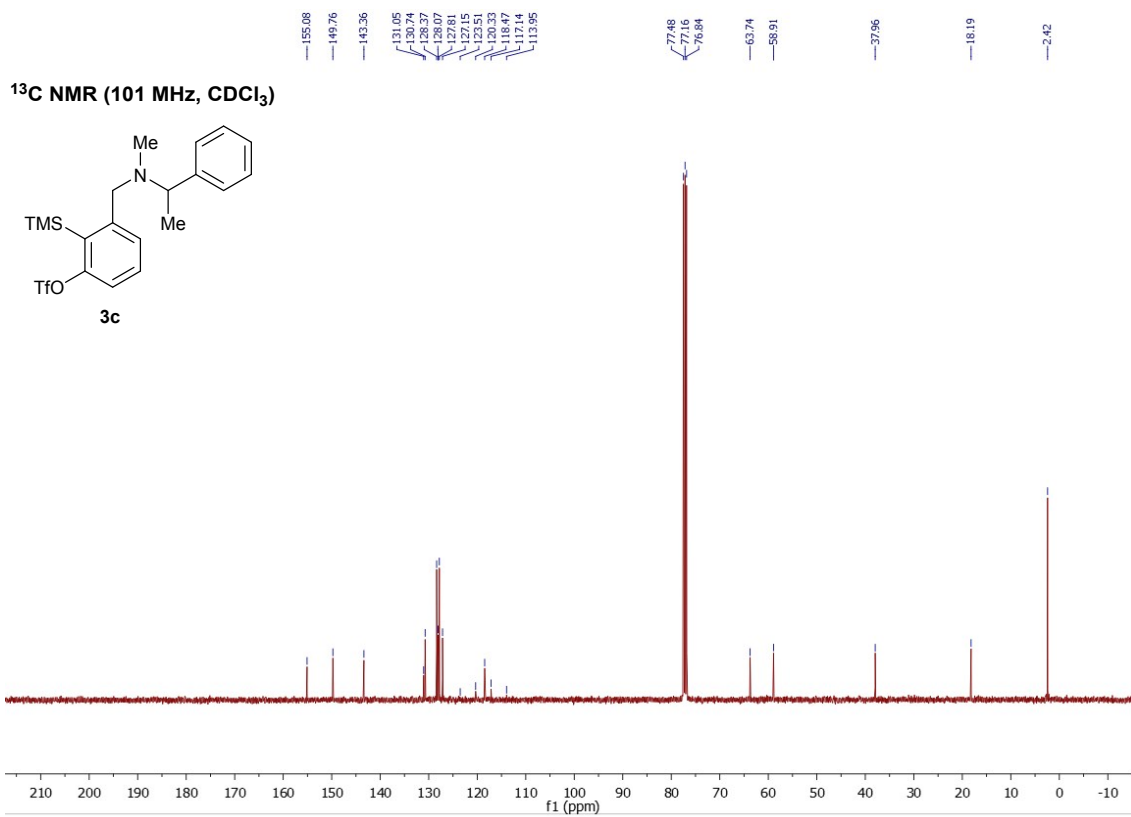

**<sup>1</sup>H NMR (400 MHz, CDCl<sub>3</sub>)**

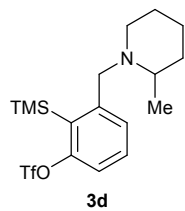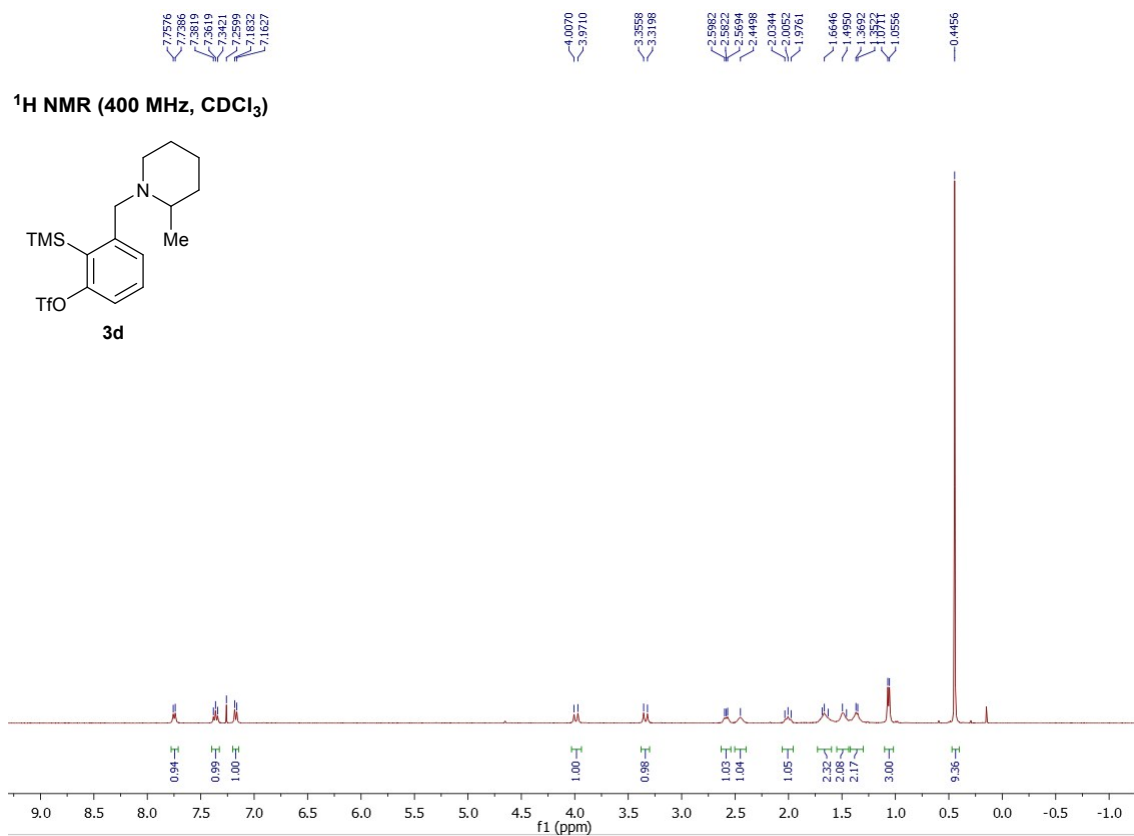

**<sup>13</sup>C NMR (101 MHz, CDCl<sub>3</sub>)**

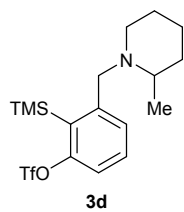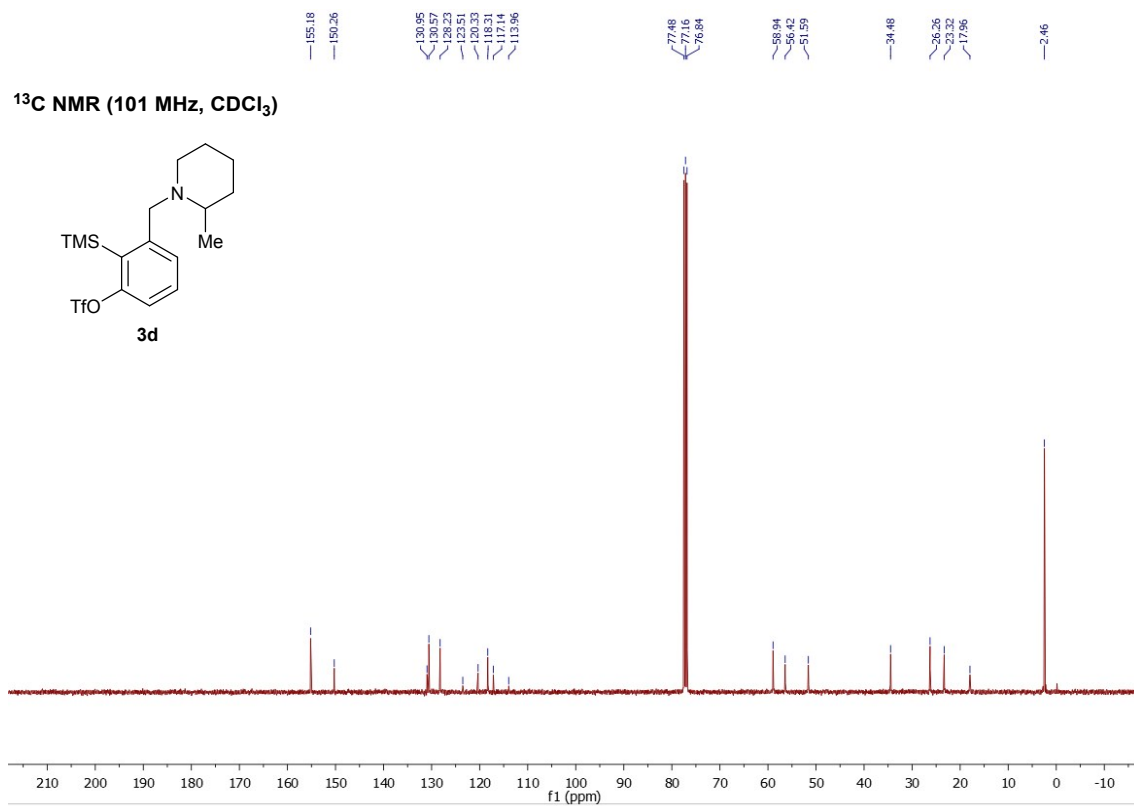

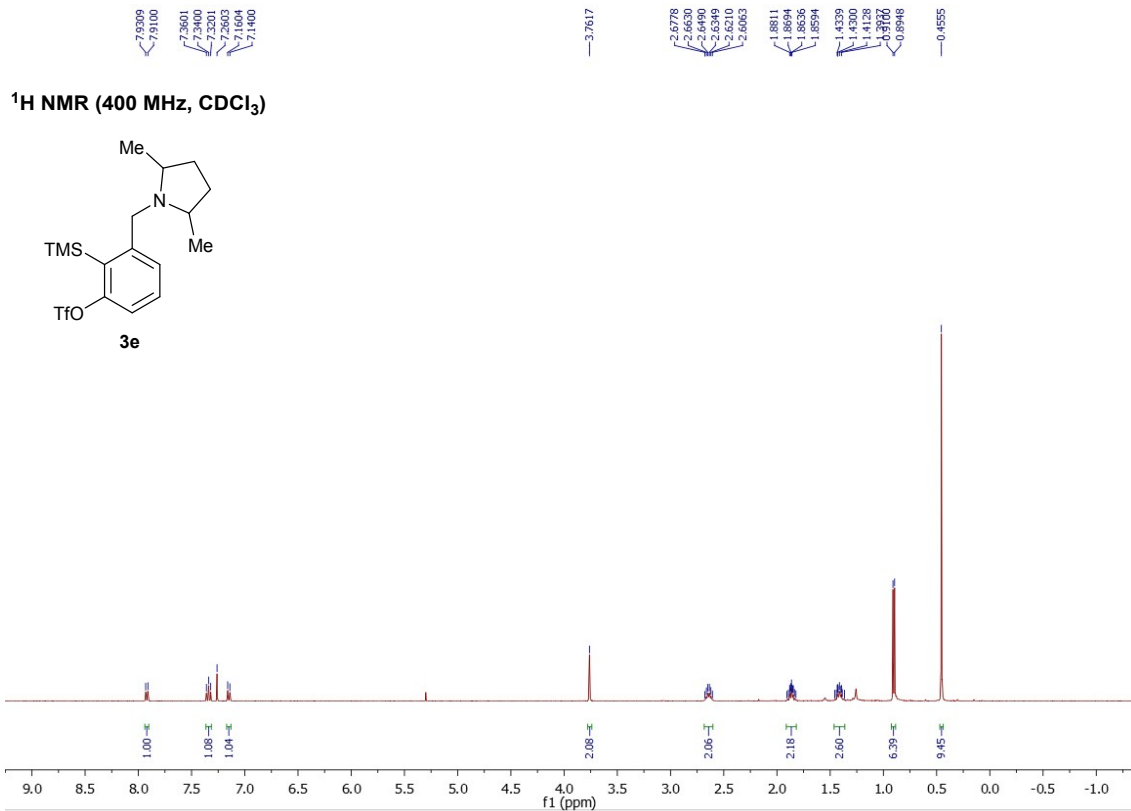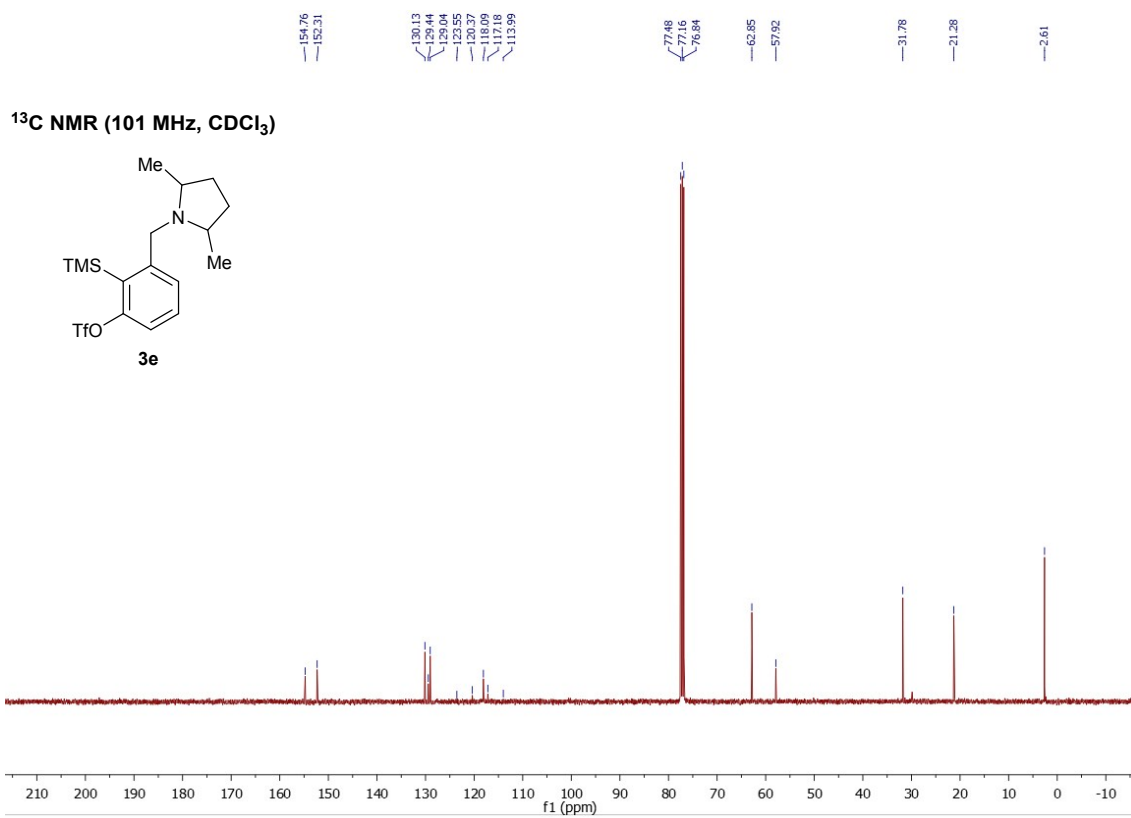

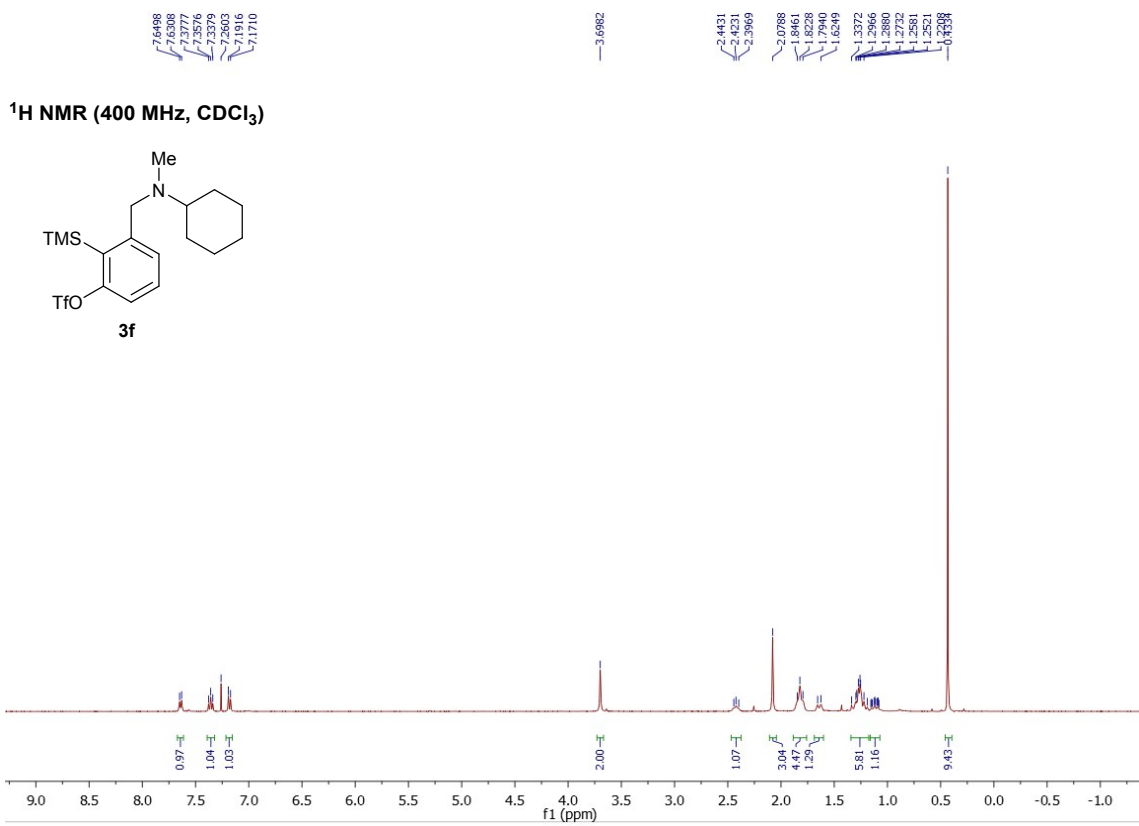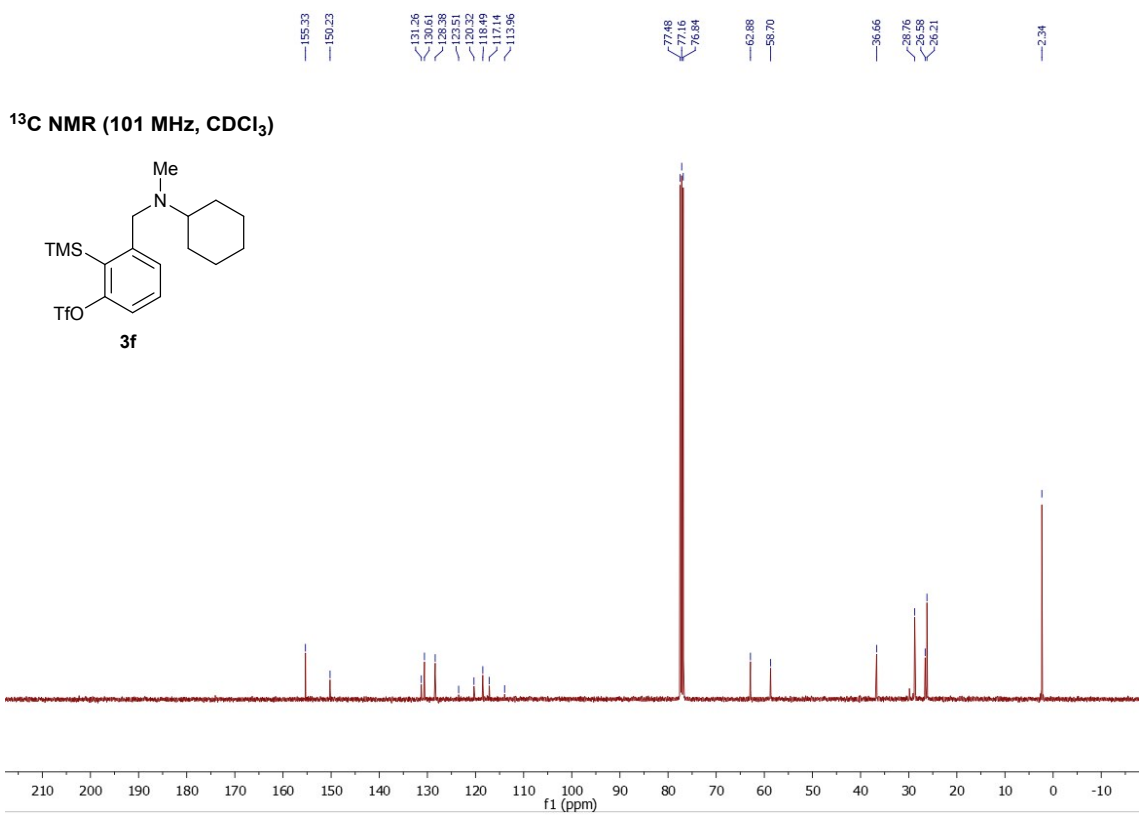



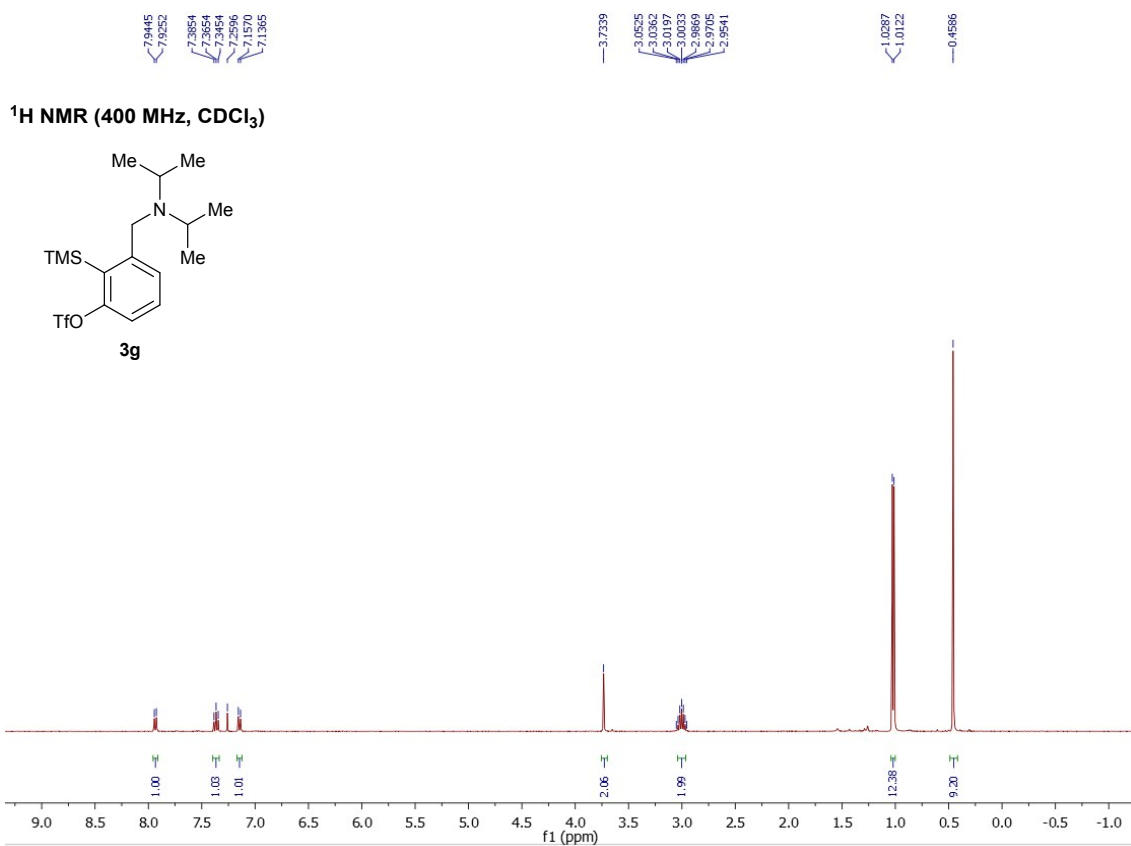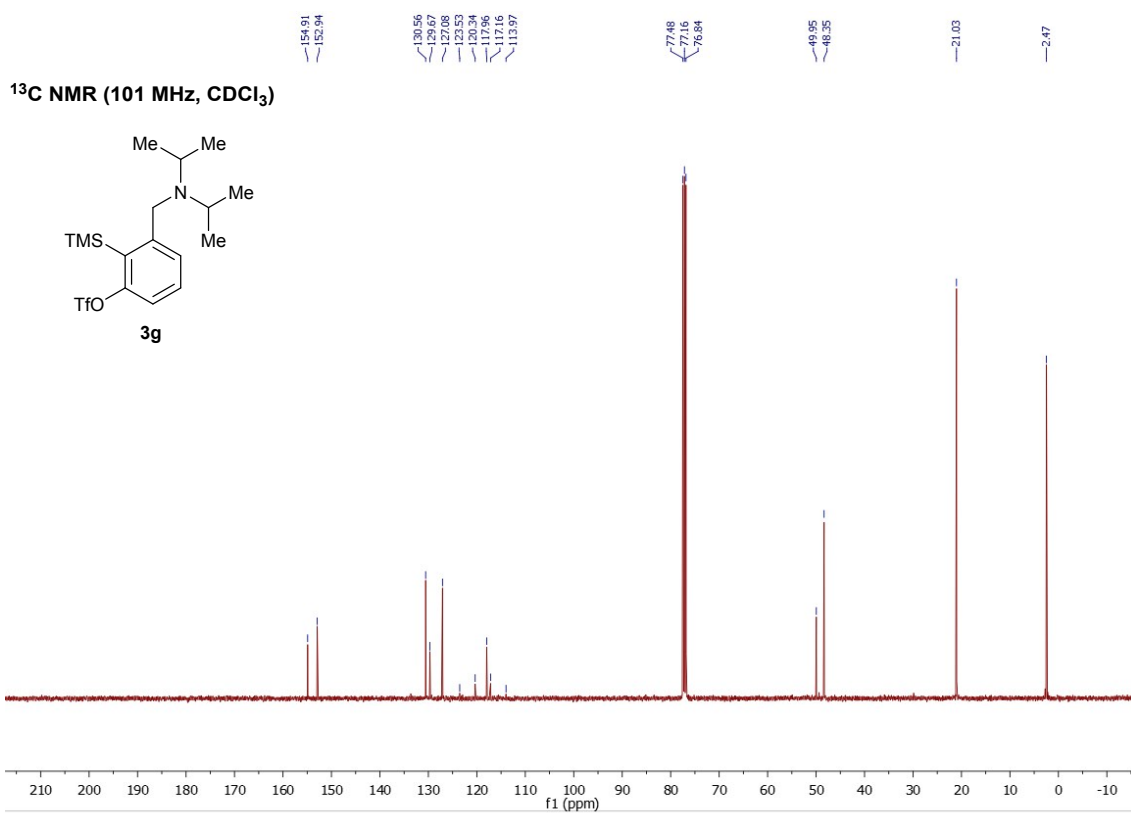

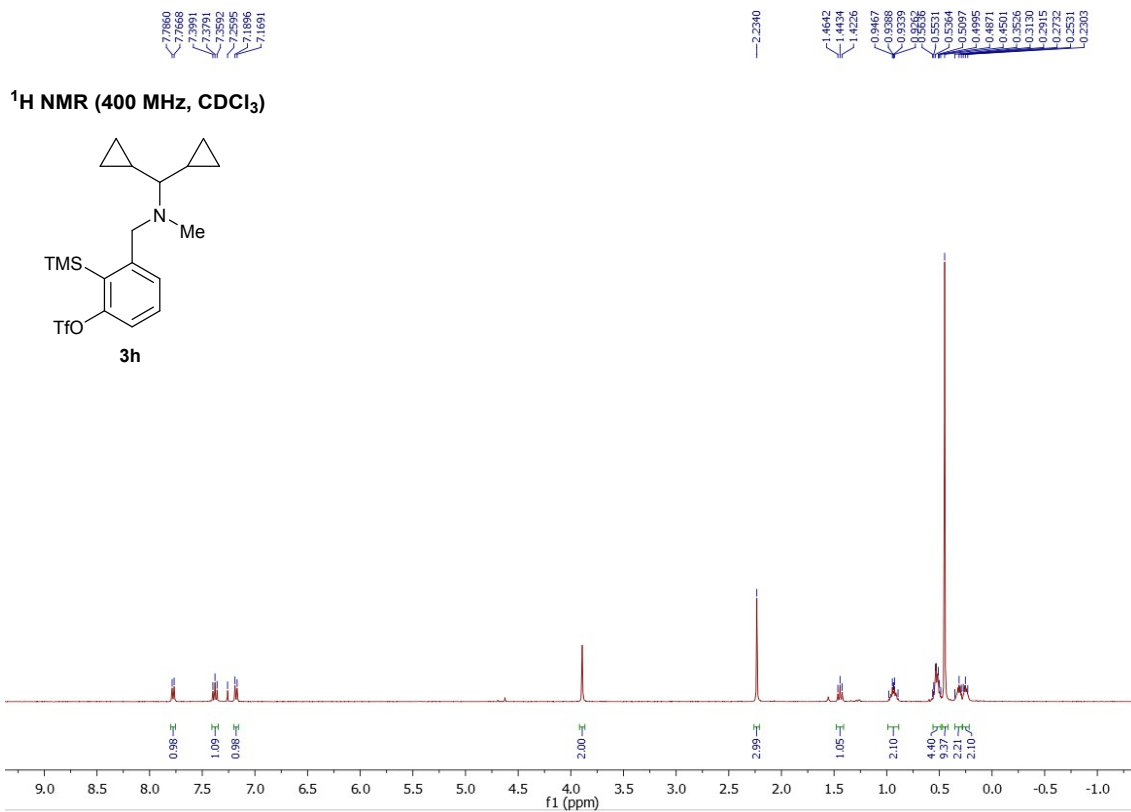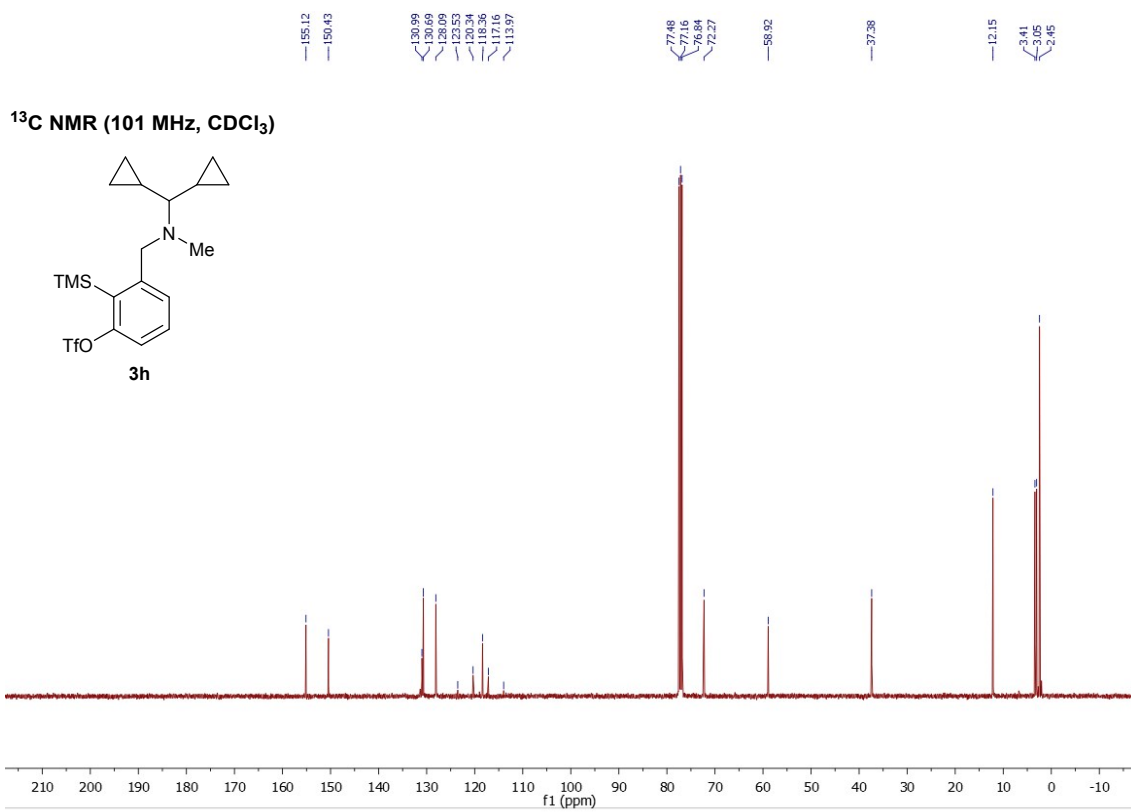

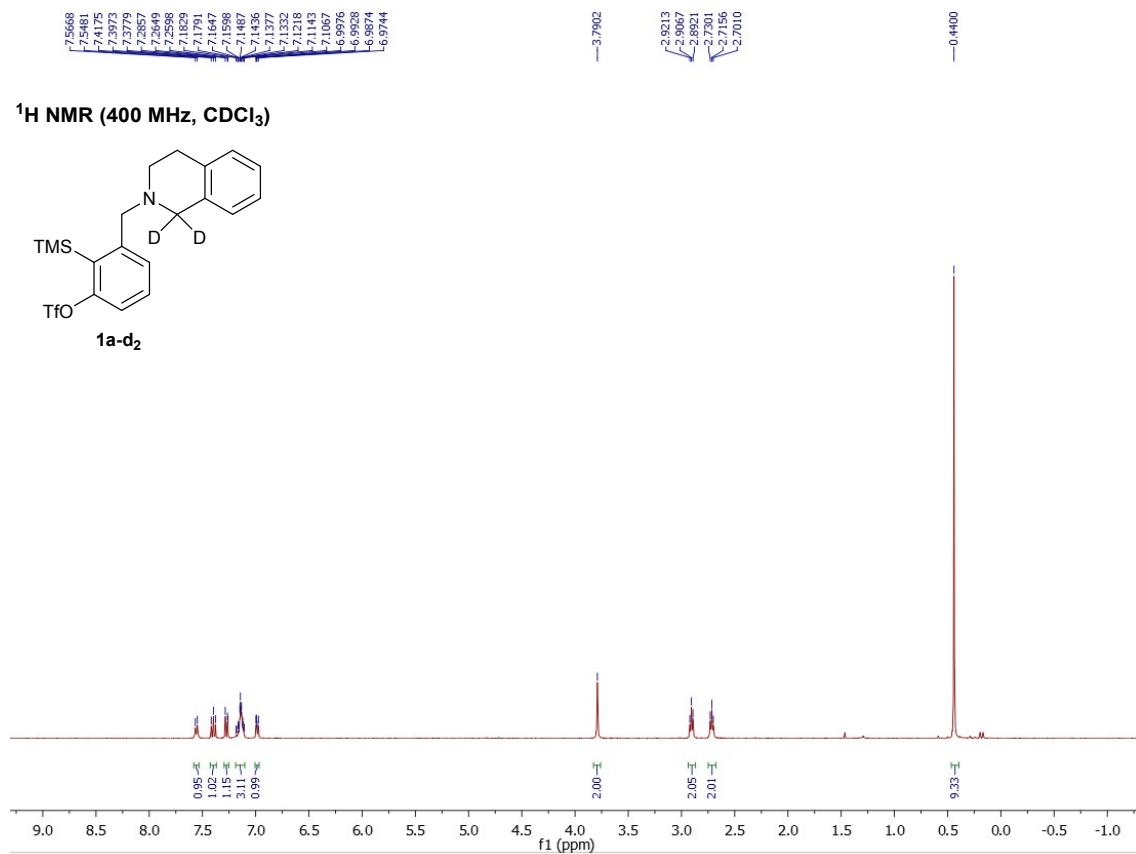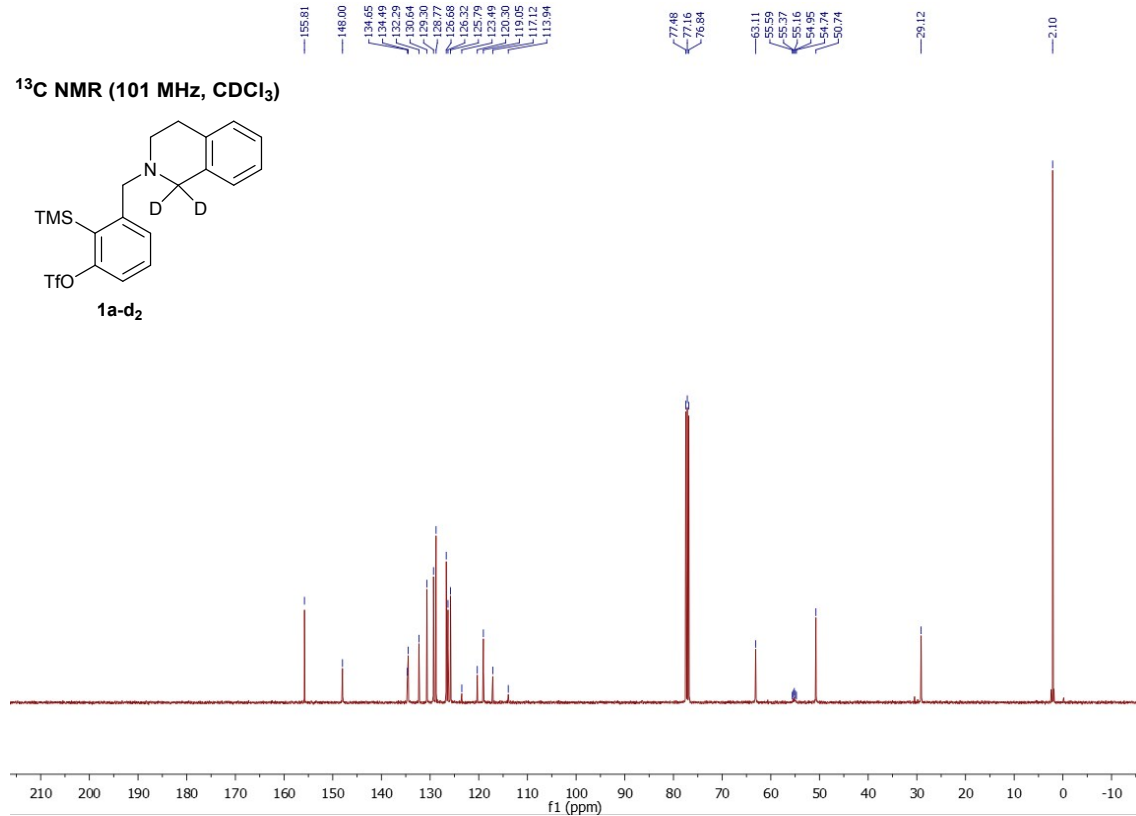

7.4471  
7.4290  
7.3750  
7.3582  
7.3385  
7.3082  
7.2913  
7.2732  
7.2599  
7.2457  
7.2412  
7.2274  
7.2152  
7.2137  
7.2056  
7.1992  
7.1861  
7.1656  
7.1588  
7.1440  
7.1172  
7.0816  
7.0584

4.1052  
4.0899  
4.0741  
3.8817  
3.8878  
3.8664  
3.7985  
3.1880  
3.1731  
3.1613  
3.1510  
3.1409  
3.1300  
3.1184  
3.0942  
2.9711  
2.9610  
2.9443  
2.9299  
2.9208  
2.9072  
2.8803  
2.8700  
2.8574  
2.8447  
2.8376  
2.8265  
2.8025  
2.7846  
2.7387  
2.7253  
2.6968  
2.6803  
2.6630

**<sup>1</sup>H NMR (400 MHz, CDCl<sub>3</sub>)**

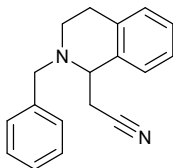

**2a**

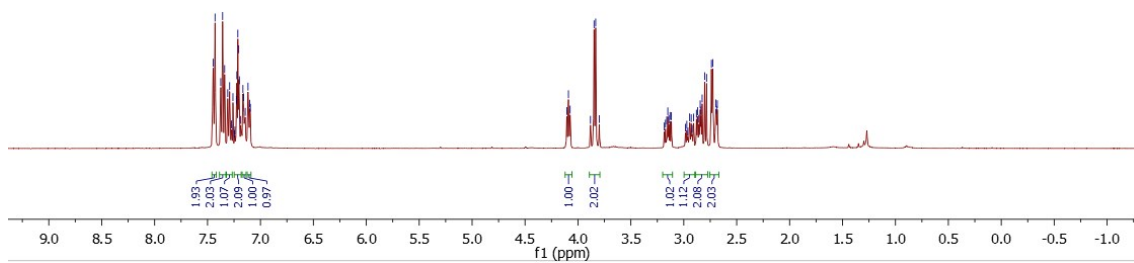

136.59  
135.18  
135.09  
134.90  
134.66  
128.60  
127.60  
127.52  
127.42  
126.49  
118.60  
77.48  
77.16  
76.84  
58.47  
58.01  
43.87  
25.55  
25.20

**<sup>13</sup>C NMR (101 MHz, CDCl<sub>3</sub>)**

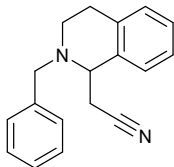

**2a**

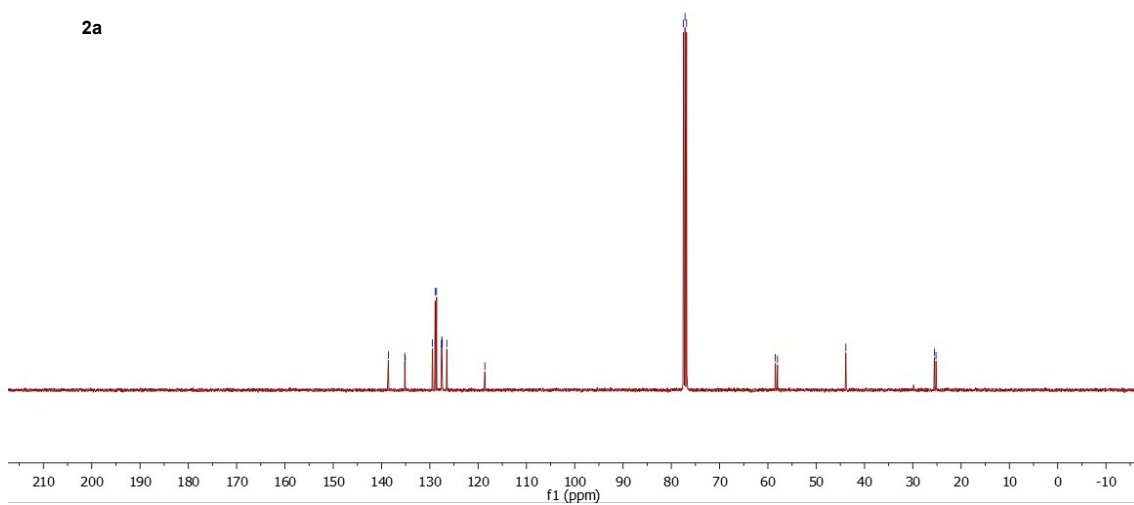

**<sup>1</sup>H NMR (400 MHz, CDCl<sub>3</sub>)**

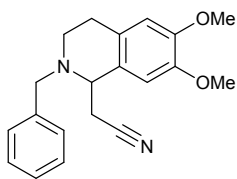

**2b**

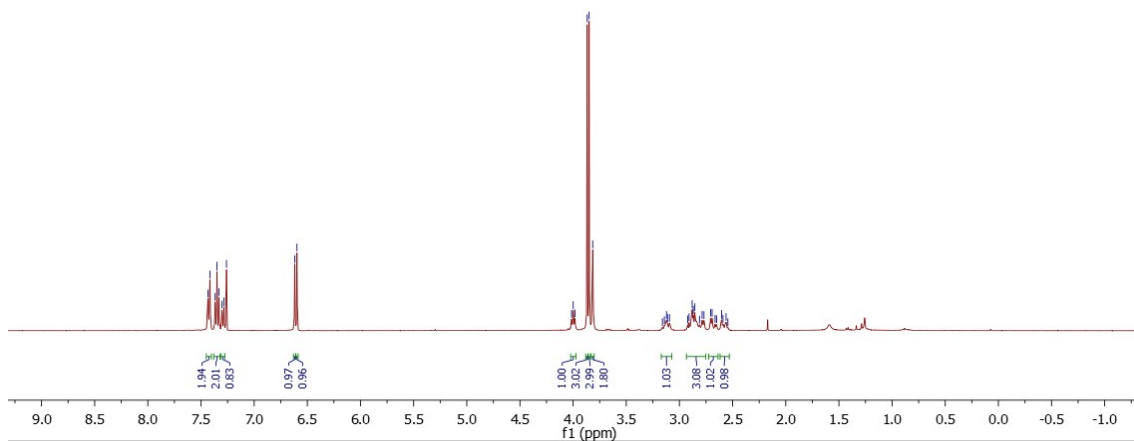

**<sup>13</sup>C NMR (101 MHz, CDCl<sub>3</sub>)**

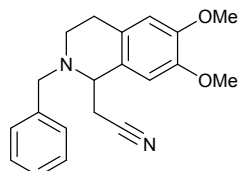

**2b**

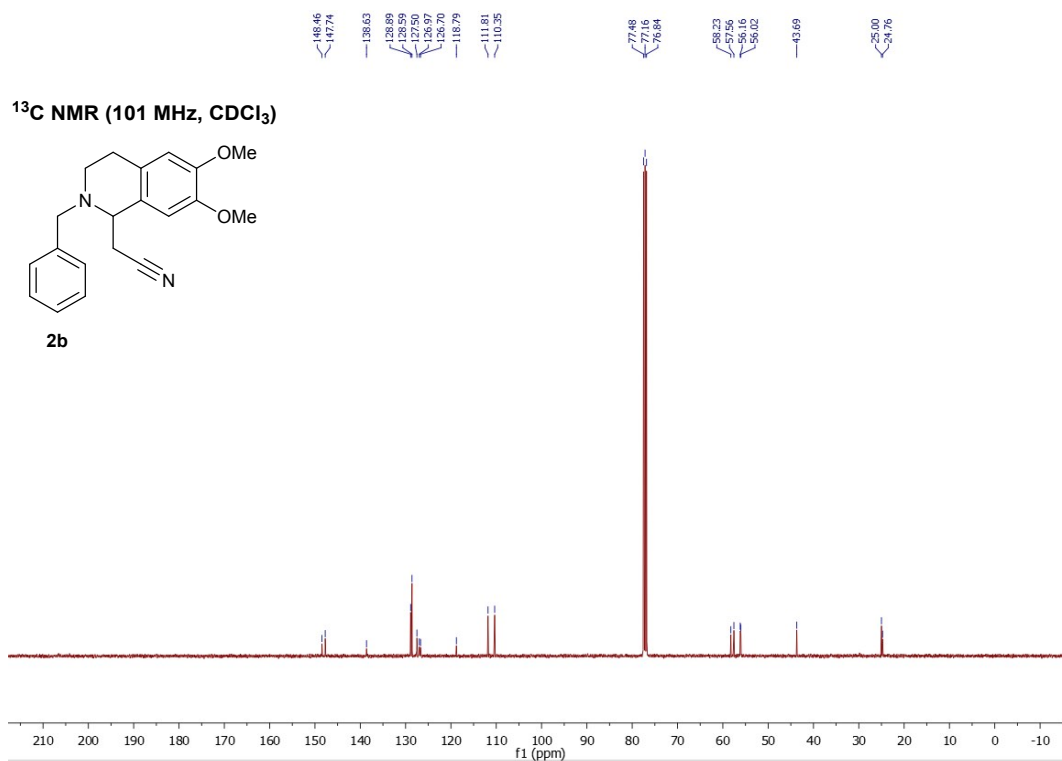

7.4261  
7.4082  
7.3620  
7.3445  
7.3257  
7.2999  
7.2820  
7.2603  
6.9793  
6.9585  
6.7009  
6.6946  
6.6901  
6.6740  
6.6238  
6.6182  
-5.3471  
4.0427  
4.0279  
4.0128  
3.8575  
3.8237  
3.7989  
3.7651  
3.7446  
3.7244  
3.1036  
3.0856  
3.0730  
2.9043  
2.8913  
2.8817  
2.8653  
2.8500  
2.8318  
2.8066  
2.7938  
2.7668  
2.7516  
2.7118  
2.6795  
2.6705  
2.6600  
2.6394  
2.6285

**<sup>1</sup>H NMR (400 MHz, CDCl<sub>3</sub>)**

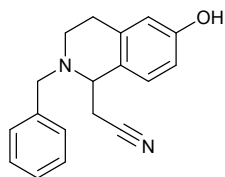

**2c**

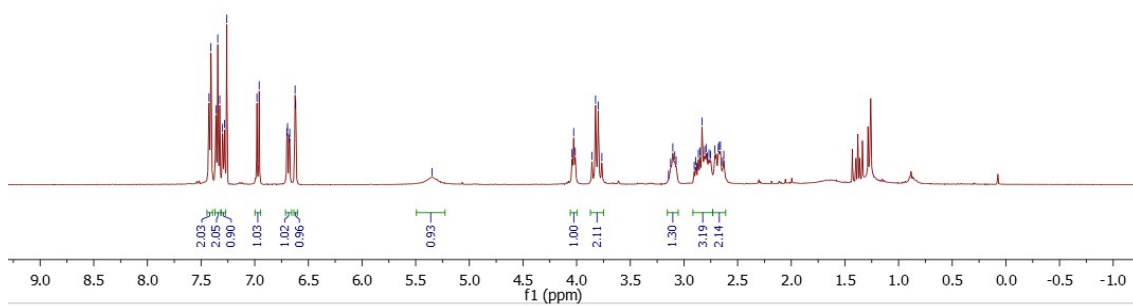

**<sup>13</sup>C NMR (101 MHz, CDCl<sub>3</sub>)**

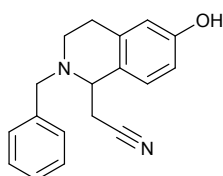

**2c**

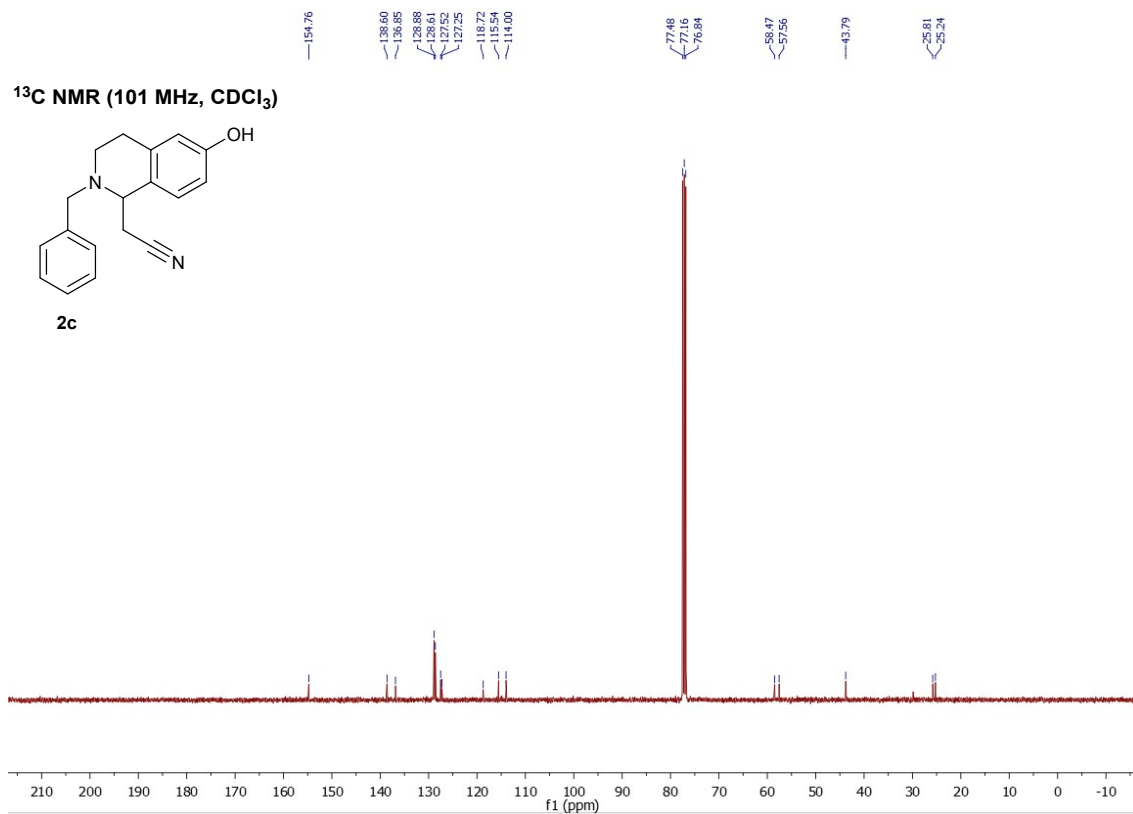

7.4522  
7.4452  
7.3723  
7.3697  
7.3650  
7.3521  
7.3480  
7.3433  
7.3374  
7.3222  
7.3107  
7.3074  
7.2958  
7.2899  
7.2820  
7.2717  
7.2308  
7.2261  
7.0432  
7.0227

4.0438  
4.0287  
4.0120  
3.8438  
3.8099  
3.8021  
3.6582  
3.1876  
3.1684  
3.1593  
3.1478  
3.1382  
3.1222  
3.1079  
3.0991  
2.9080  
2.8946  
2.8838  
2.8694  
2.8545  
2.8486  
2.8390  
2.8254  
2.8145  
2.7964  
2.7722  
2.7541  
2.7414  
2.7194  
2.6901  
2.6770  
2.6602  
2.6411  
2.6313  
2.6140

**<sup>1</sup>H NMR (400 MHz, CDCl<sub>3</sub>)**

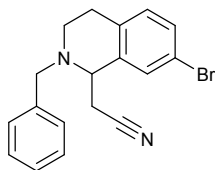

**2d**

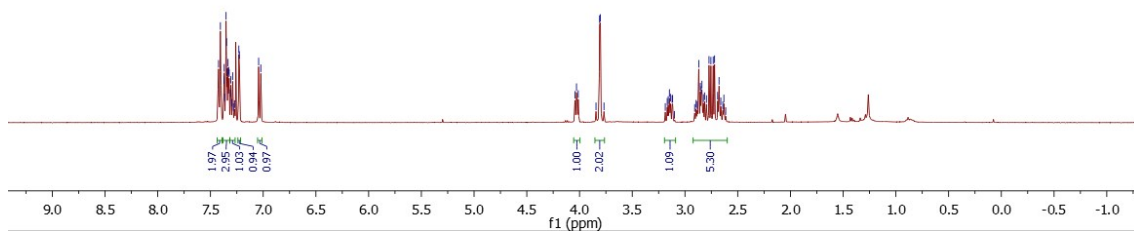

138.21  
137.17  
134.23  
131.18  
130.60  
130.37  
128.64  
127.65  
119.86  
118.13

77.48  
77.16  
76.84

58.35  
57.46

— 63.63

26.23  
24.89

**<sup>13</sup>C NMR (101 MHz, CDCl<sub>3</sub>)**

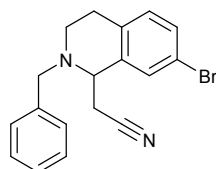

**2d**

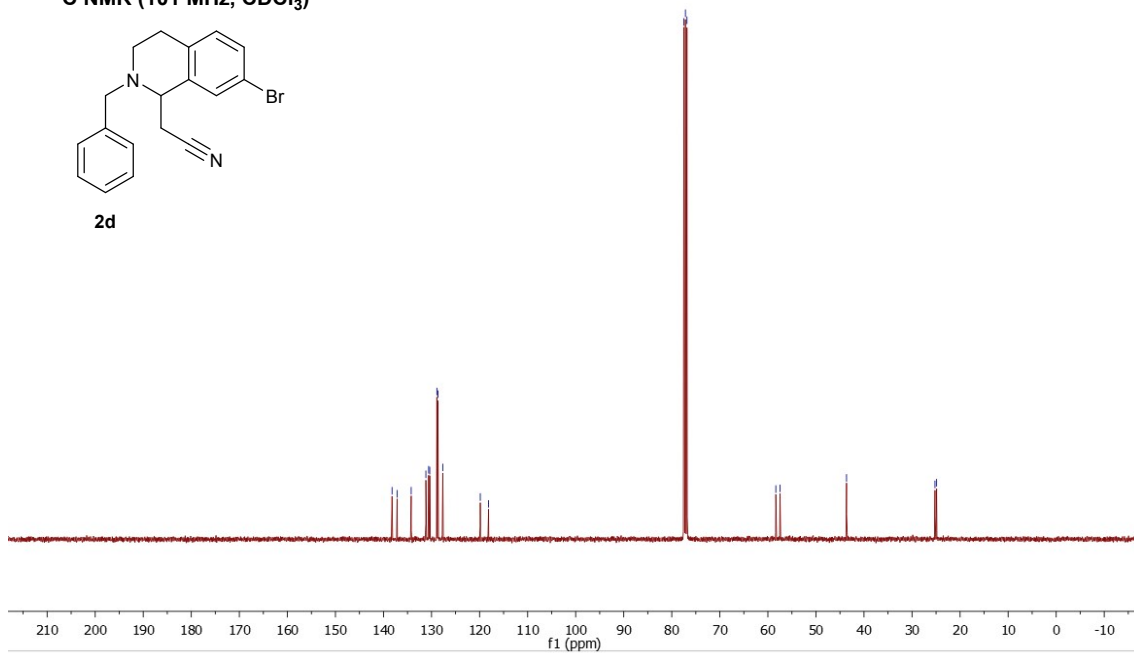

7.4242  
7.4062  
7.3728  
7.3703  
7.3657  
7.3527  
7.3490  
7.3359  
7.3283  
7.3114  
7.3079  
7.2964  
7.2901  
7.2834  
7.2722  
7.2689  
7.2601  
7.2025  
7.1975  
7.1851  
7.1768  
7.1000  
7.0809  
7.0782

4.0440  
4.0295  
4.0133  
3.8469  
3.8130  
3.8041  
3.7903  
3.1822  
3.1701  
3.1594  
3.1478  
3.1382  
3.1222  
3.1155  
2.9266  
2.9162  
2.8953  
2.8894  
2.8695  
2.8571  
2.8459  
2.8356  
2.8227  
2.8172  
2.7952  
2.7746  
2.7570  
2.7346  
2.7216  
2.7018  
2.6925  
2.6795  
2.6604  
2.6503  
2.6342

**<sup>1</sup>H NMR (400 MHz, CDCl<sub>3</sub>)**

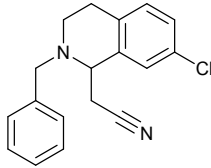

**2e**

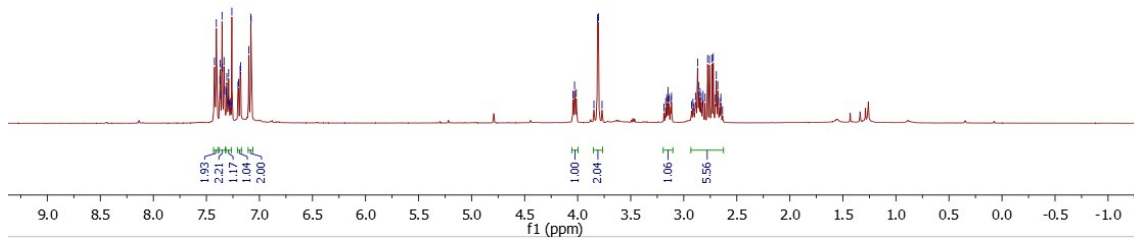

**<sup>13</sup>C NMR (101 MHz, CDCl<sub>3</sub>)**

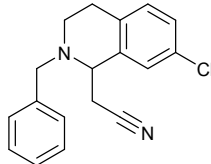

**2e**

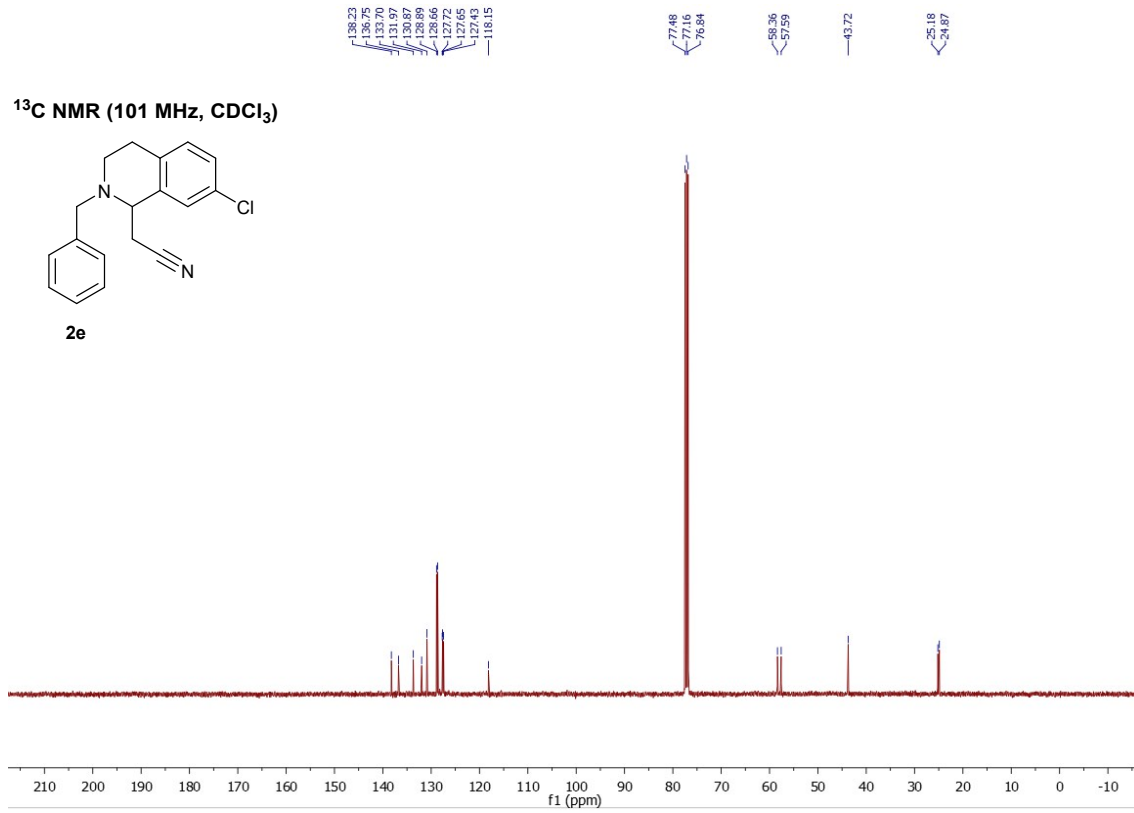



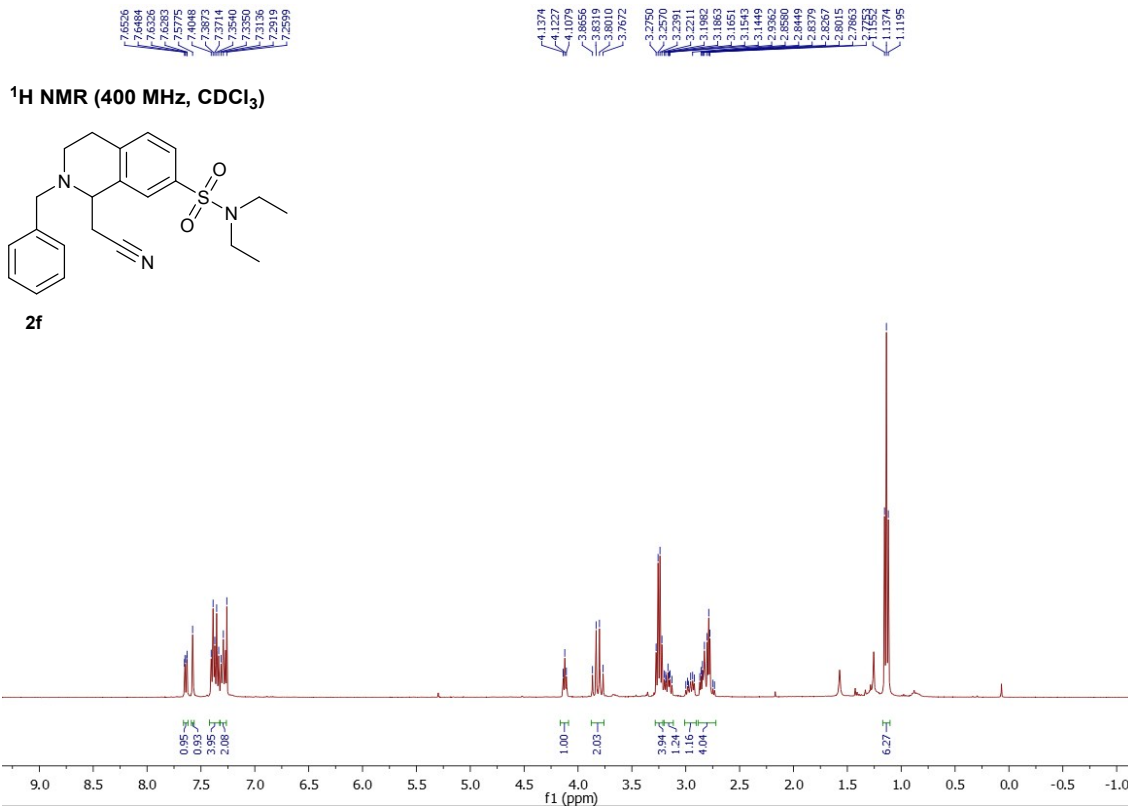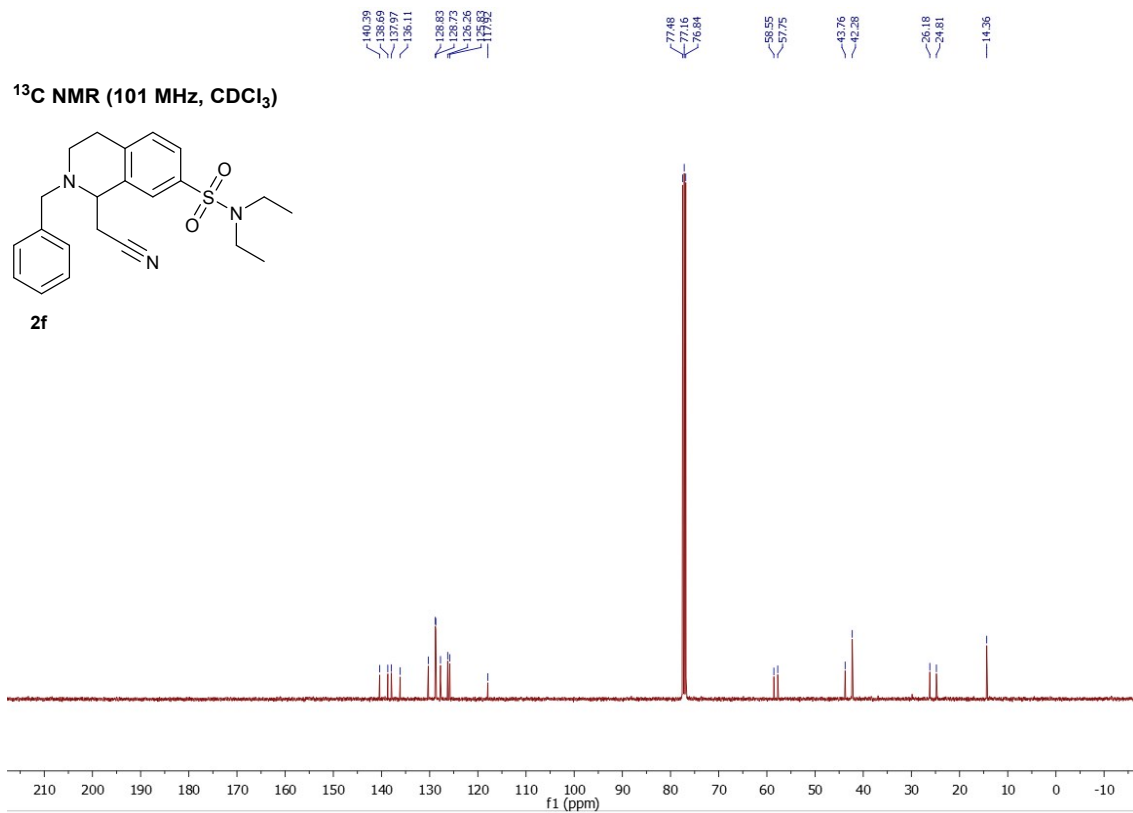

7.4503  
7.4328  
7.4200  
7.3864  
7.3844  
7.3629  
7.3462  
7.3267  
7.3064  
7.2941  
7.2883  
7.2803  
7.2419  
7.2373  
7.2323  
7.2189  
7.2030  
7.1847  
7.1811  
7.1679  
7.1521  
7.1469  
7.1297  
7.1122  
7.0959  
7.0928  
7.0795  
4.5099  
4.4994  
4.4887  
4.1488  
4.0725  
4.0185  
3.9992  
3.9842  
3.8843  
3.8095  
3.7211  
3.6469  
3.6128  
2.9978  
2.8252  
2.7043  
2.6948  
2.6782  
2.6627  
2.4923  
2.4819  
1.2381

**<sup>1</sup>H NMR (400 MHz, CDCl<sub>3</sub>)**

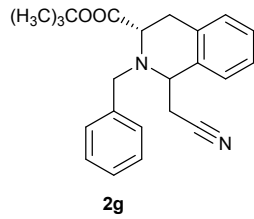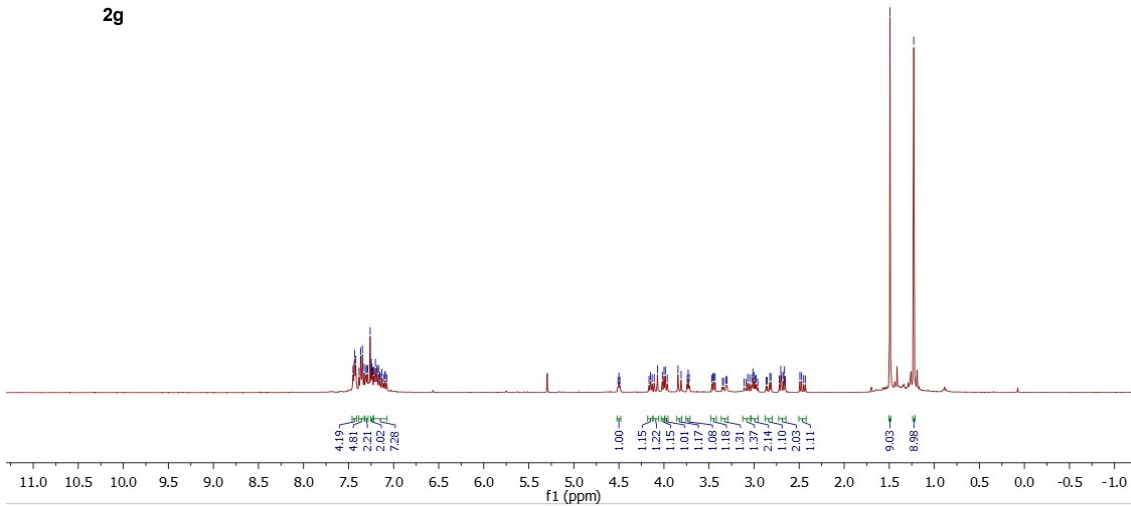

172.08  
172.27  
138.48  
135.47  
133.79  
128.14  
127.52  
126.78  
126.68  
126.55  
126.37  
121.79  
121.77  
121.77  
121.22  
121.13  
126.93  
118.94  
118.07  
81.53  
81.25  
77.45  
77.16  
76.84  
61.54  
60.73  
58.91  
58.79  
57.64  
56.53  
33.21  
30.51  
28.15  
28.00  
27.77  
26.95

**<sup>13</sup>C NMR (400 MHz, CDCl<sub>3</sub>)**

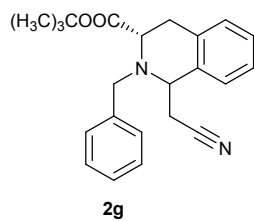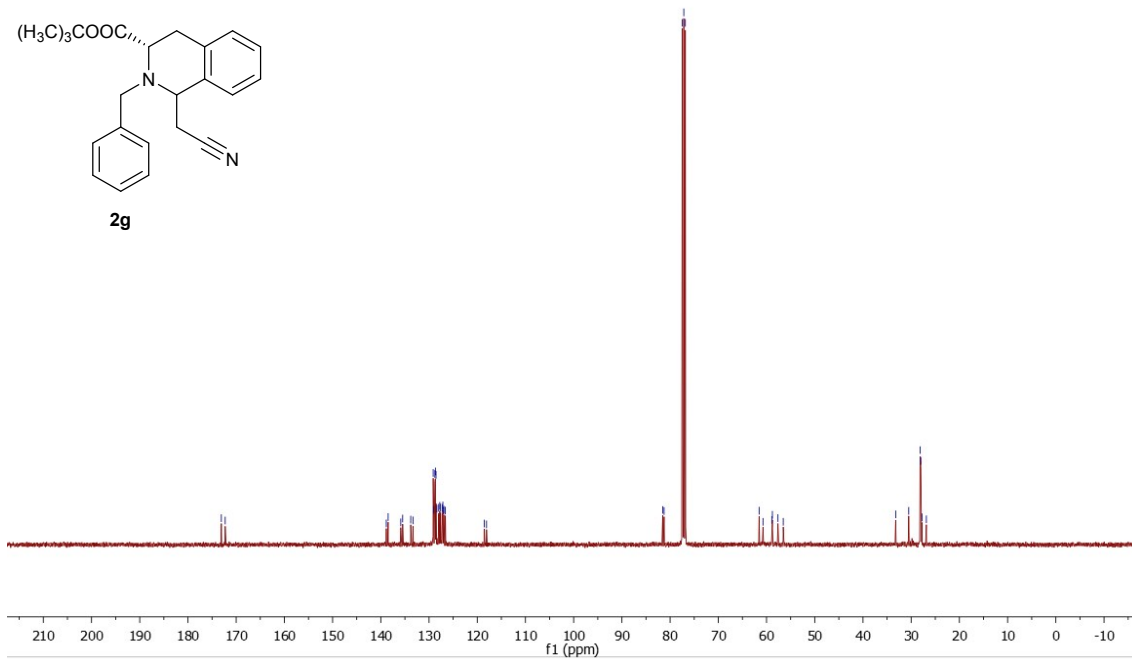

7.5137  
7.4952  
7.3744  
7.3564  
7.3372  
7.2937  
7.2753  
7.2600  
7.2418  
7.2294  
7.2162  
7.2118  
7.1975  
7.1938  
7.1802  
7.1763  
7.1688  
7.1613

3.9891  
3.9540  
3.6421  
3.6070  
3.0282  
2.9659  
2.9409  
2.9248  
2.8986  
2.8893  
2.8418  
2.8302  
2.7177  
2.6966  
2.6872  
2.6723  
2.6657

**<sup>1</sup>H NMR (400 MHz, CDCl<sub>3</sub>)**

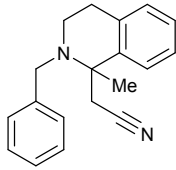

**2i**

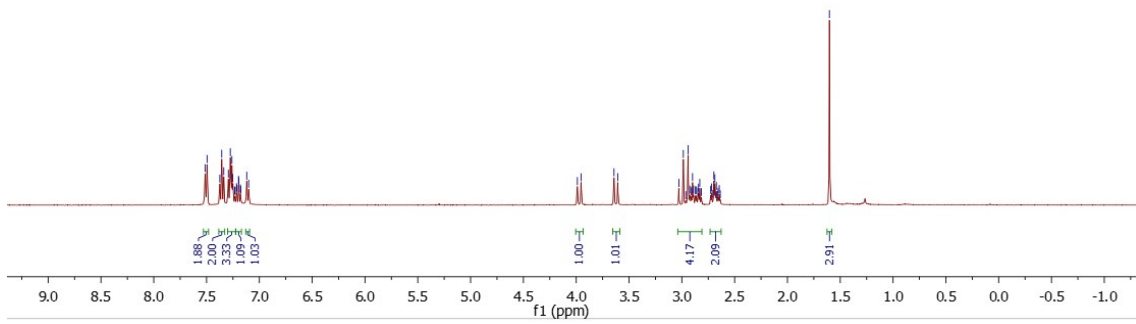

140.12  
139.83  
136.04  
129.39  
128.60  
128.41  
127.22  
118.30

77.48  
77.16  
76.84  
59.87  
55.62  
43.03  
30.17  
29.84  
23.16

**<sup>13</sup>C NMR (101 MHz, CDCl<sub>3</sub>)**

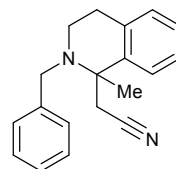

**2i**

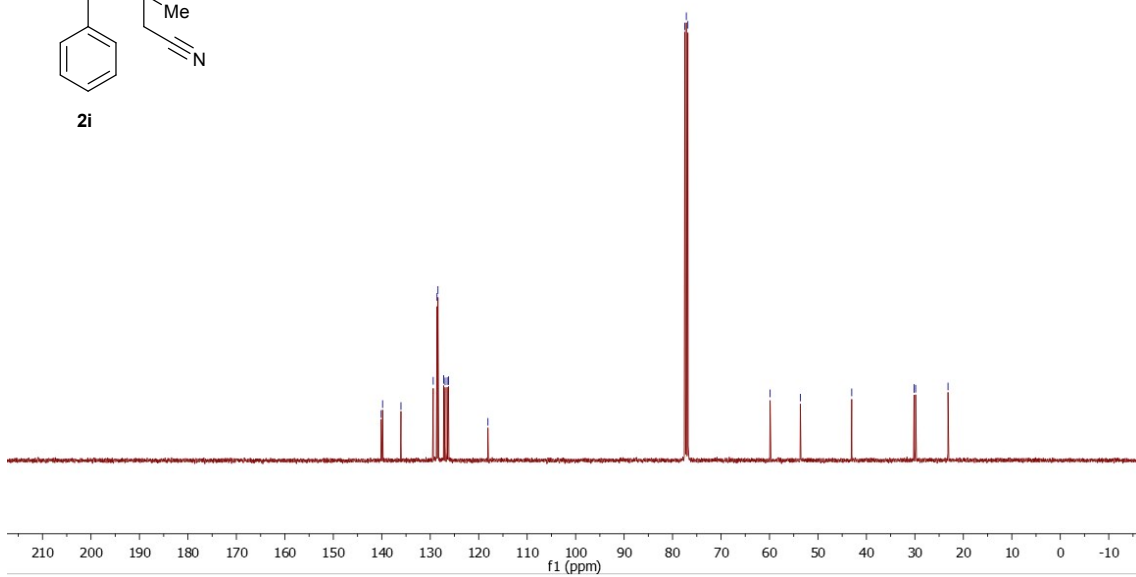

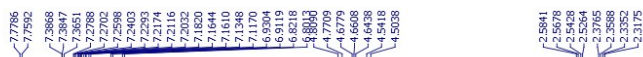

**<sup>1</sup>H NMR (400 MHz, CDCl<sub>3</sub>)**

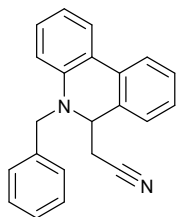

**4a**

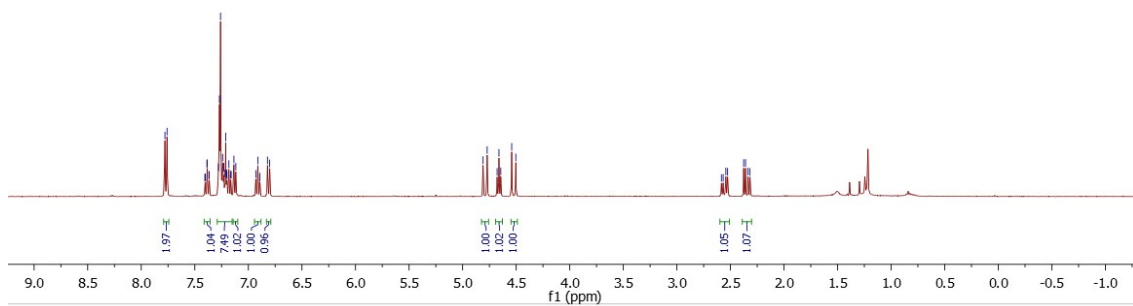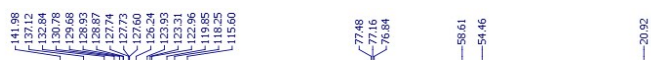

**<sup>13</sup>C NMR (101 MHz, CDCl<sub>3</sub>)**

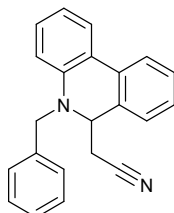

**4a**

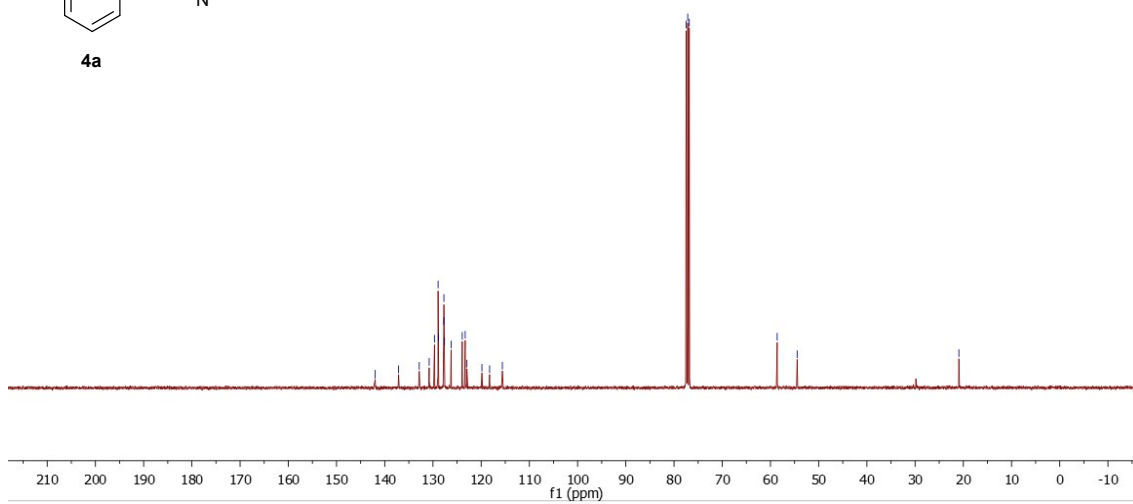

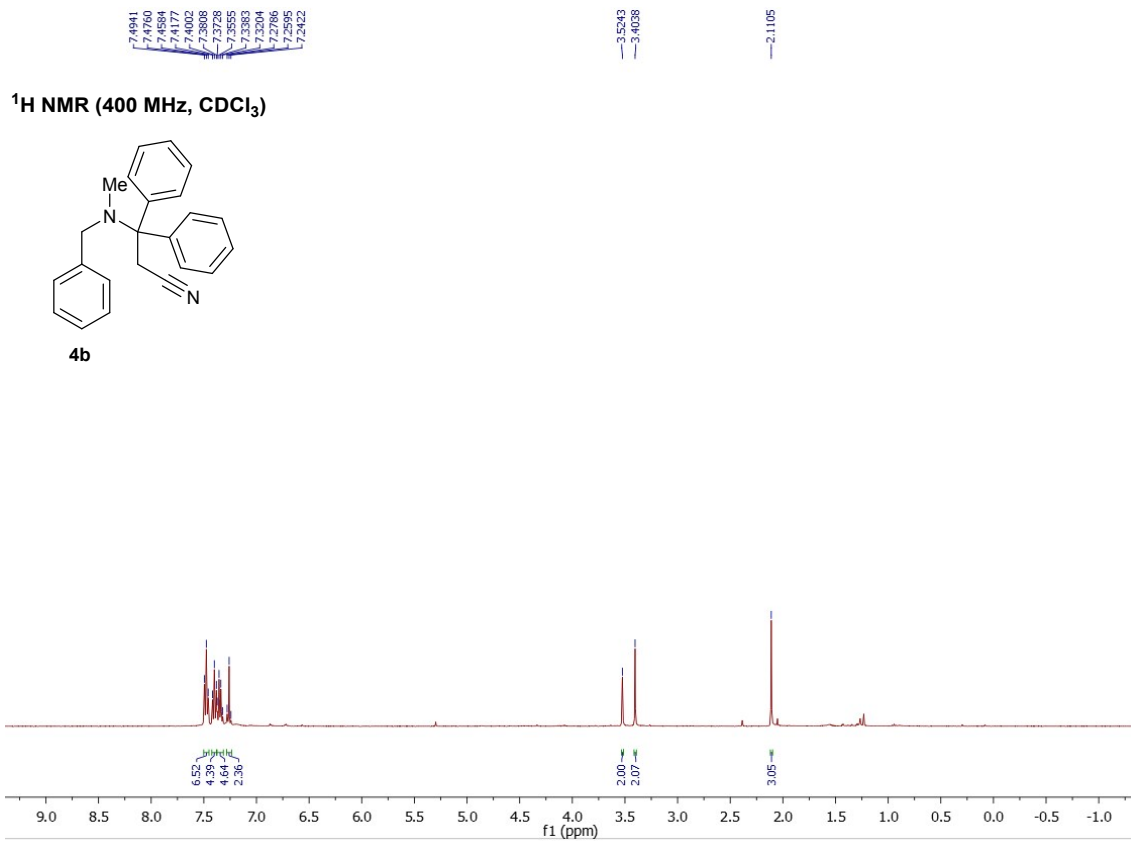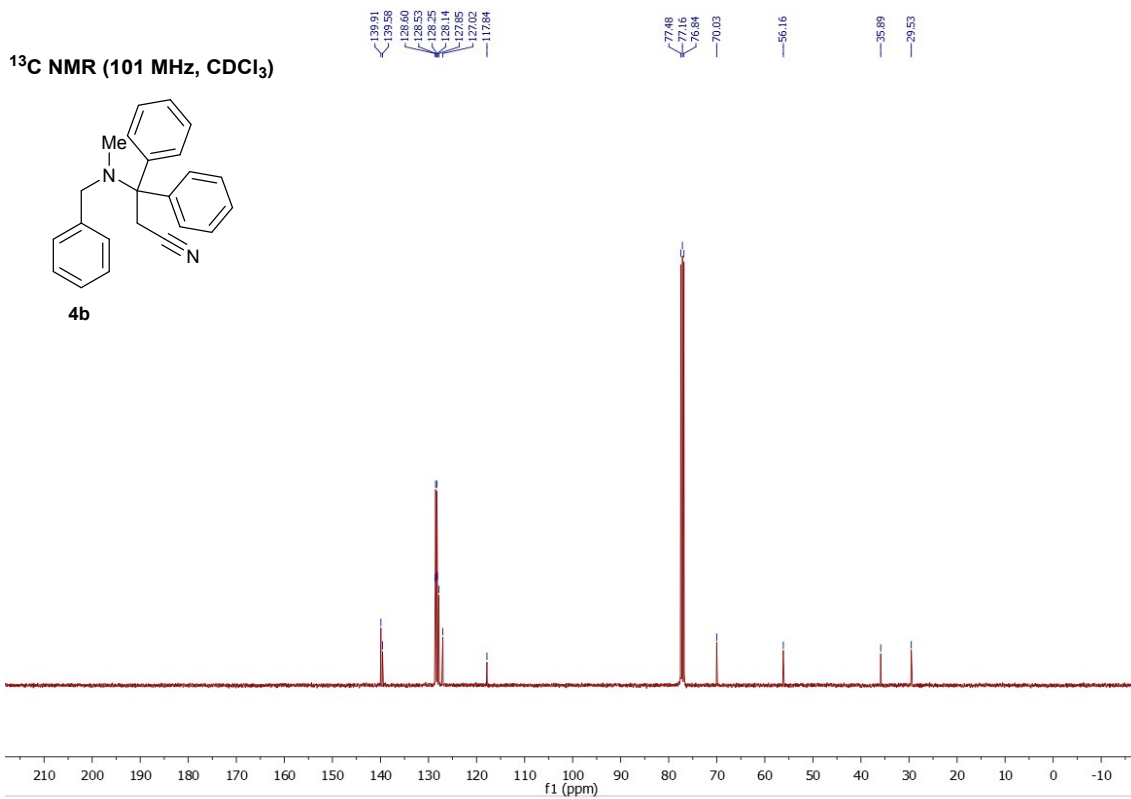

7.6891  
7.6888  
7.6664  
7.4146  
7.3961  
7.3762  
7.3462  
7.3437  
7.3272  
7.3145  
7.3145  
7.3031  
7.2966  
7.2837  
7.2780  
7.2605  
7.2438  
7.2365  
7.2097

3.5208  
3.070  
3.4074  
3.3937  
2.9316  
2.8920  
2.8533  
2.8119  
-2.1840  
-1.6612

**<sup>1</sup>H NMR (400 MHz, CDCl<sub>3</sub>)**

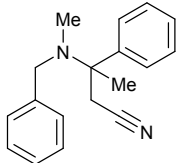

**4c**

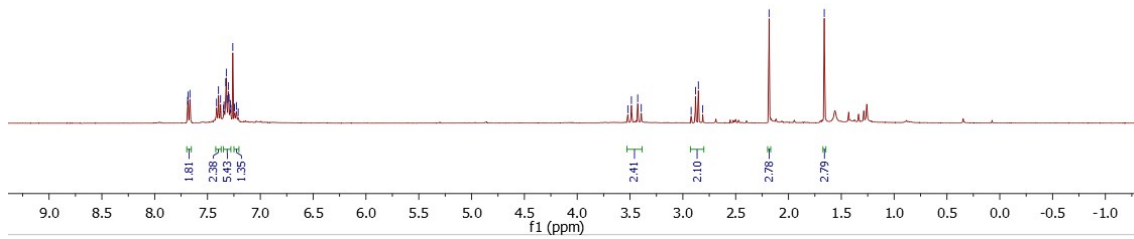

**<sup>13</sup>C NMR (101 MHz, CDCl<sub>3</sub>)**

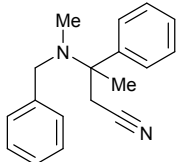

**4c**

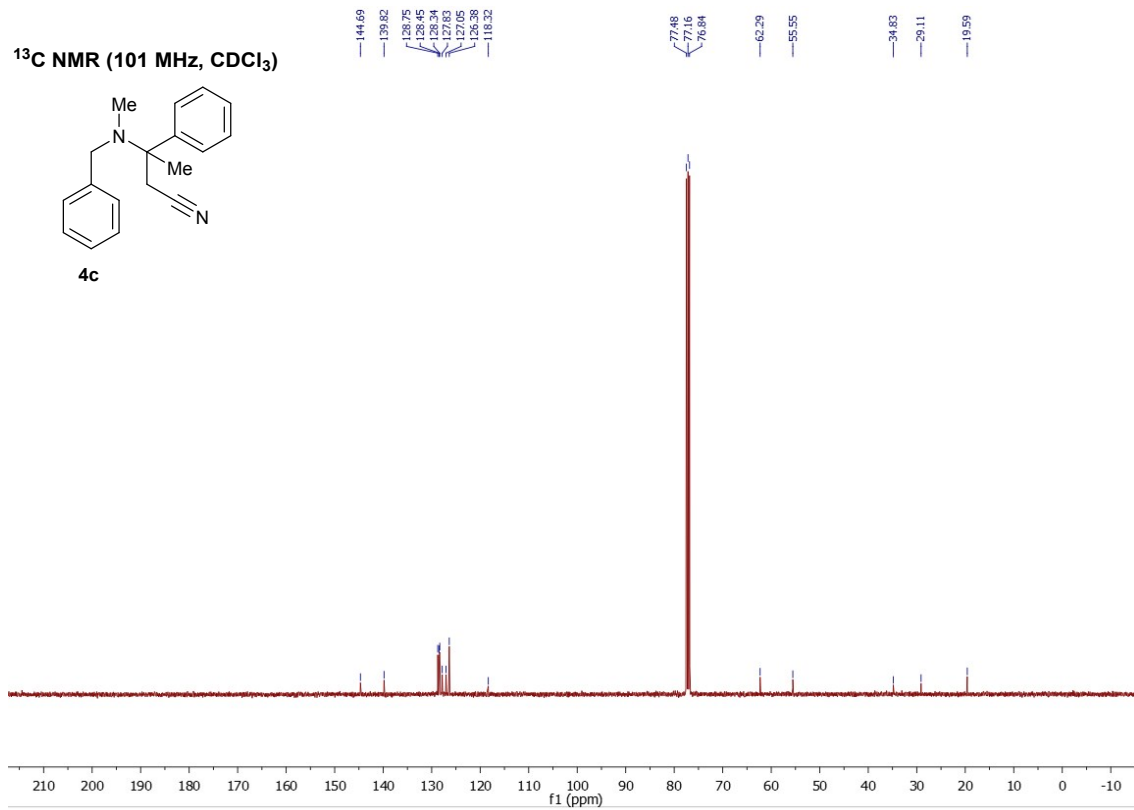

**<sup>1</sup>H NMR (400 MHz, CDCl<sub>3</sub>)**

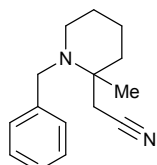

**4d**

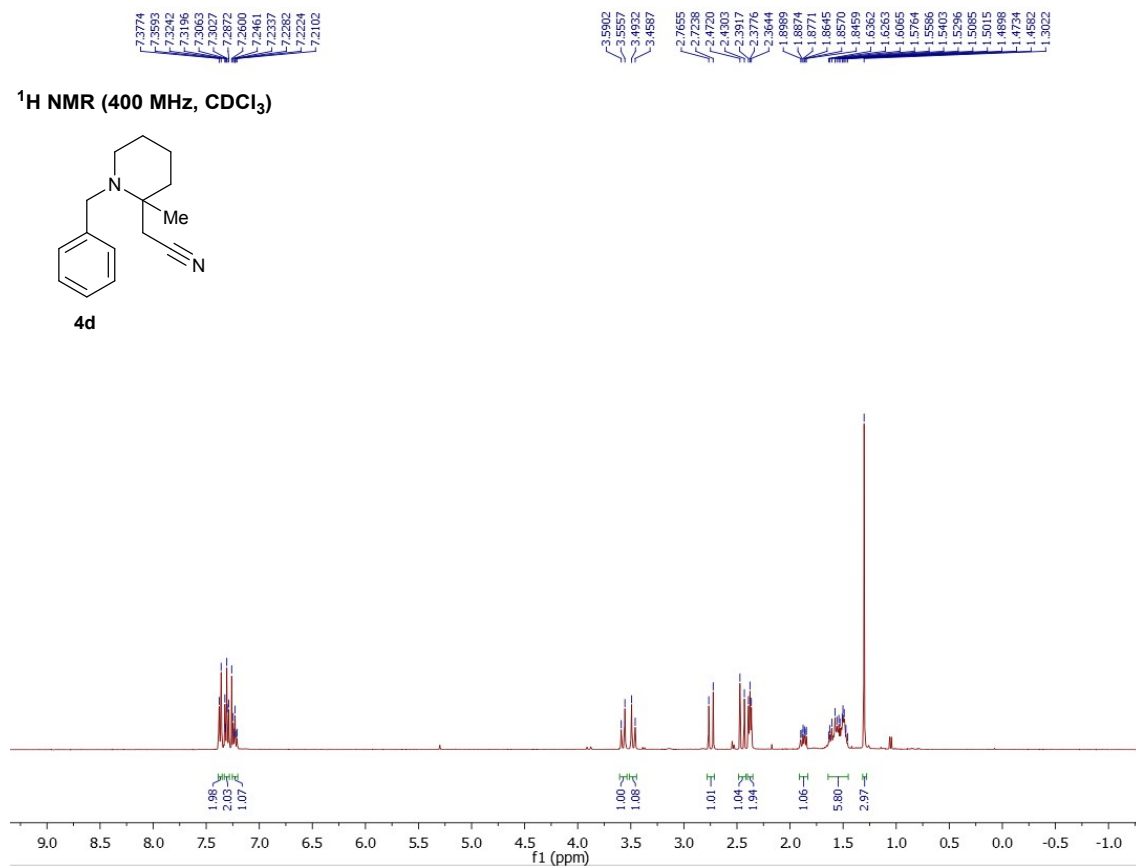

**<sup>13</sup>C NMR (101 MHz, CDCl<sub>3</sub>)**

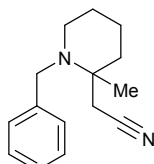

**4d**

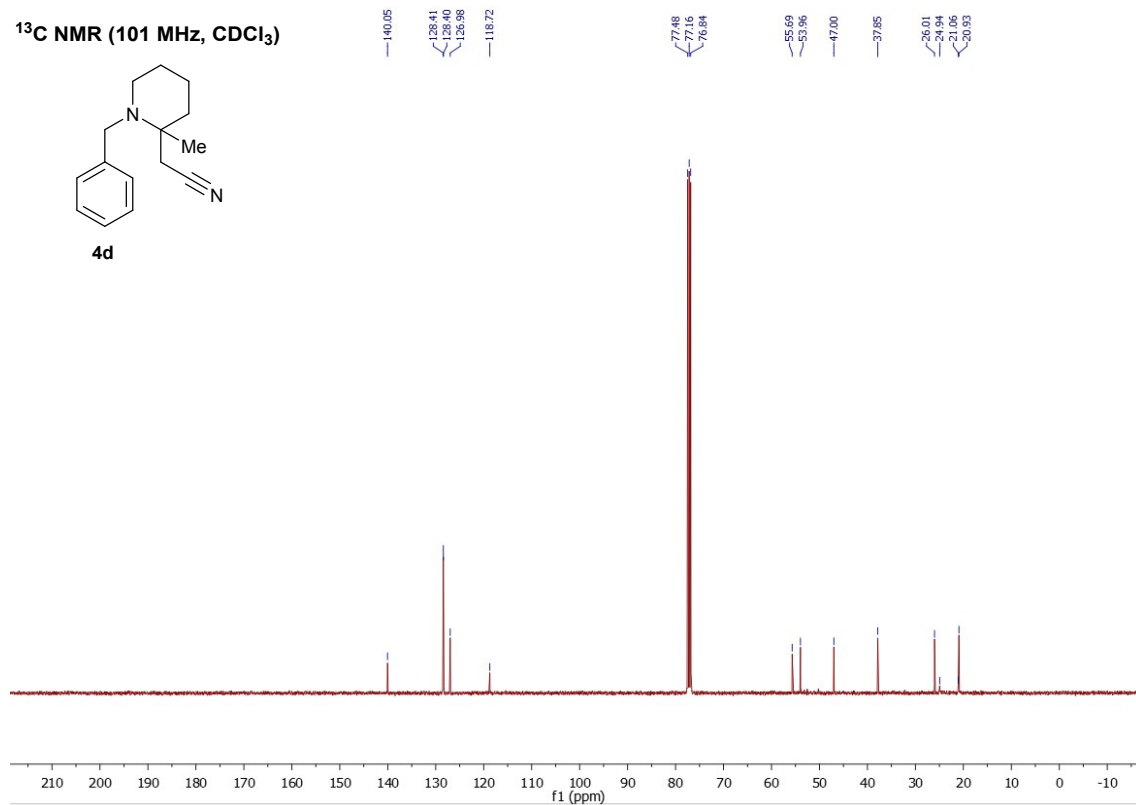

**<sup>1</sup>H NMR (400 MHz, CDCl<sub>3</sub>)**

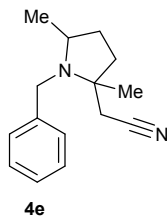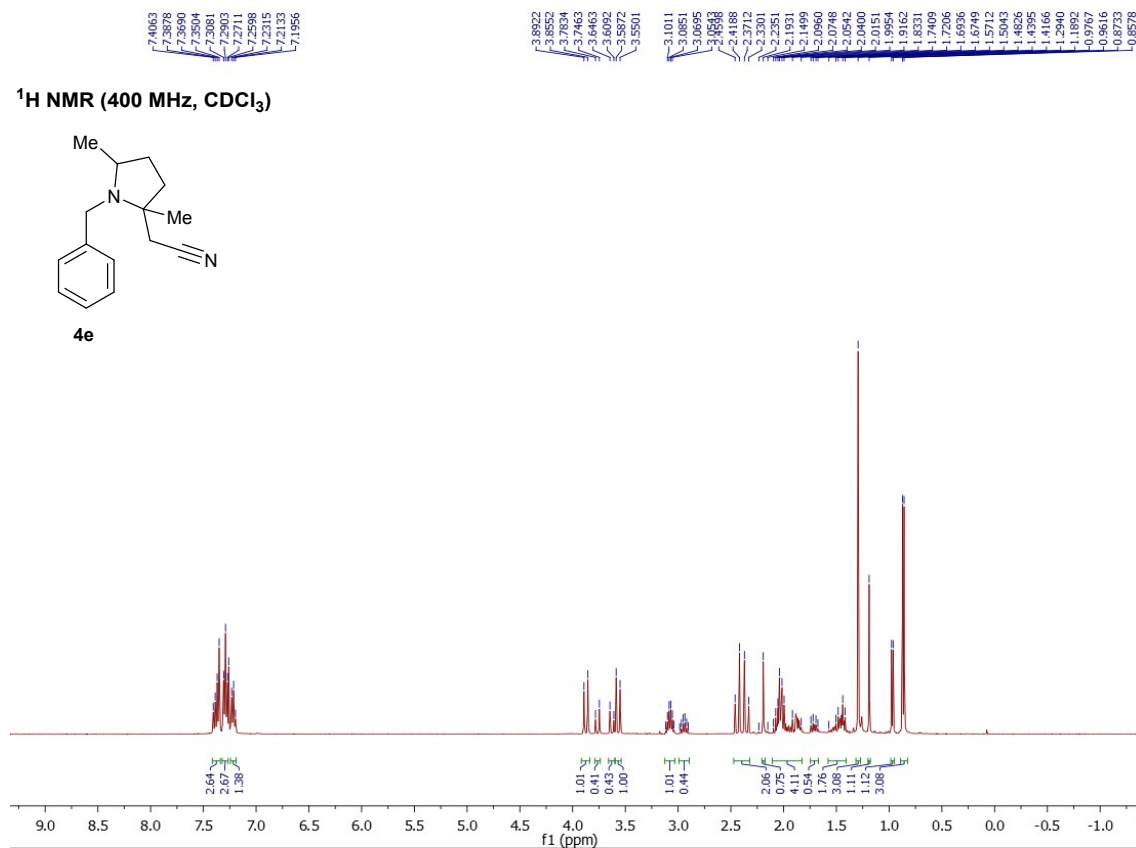

**<sup>13</sup>C NMR (101 MHz, CDCl<sub>3</sub>)**

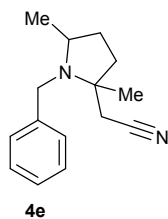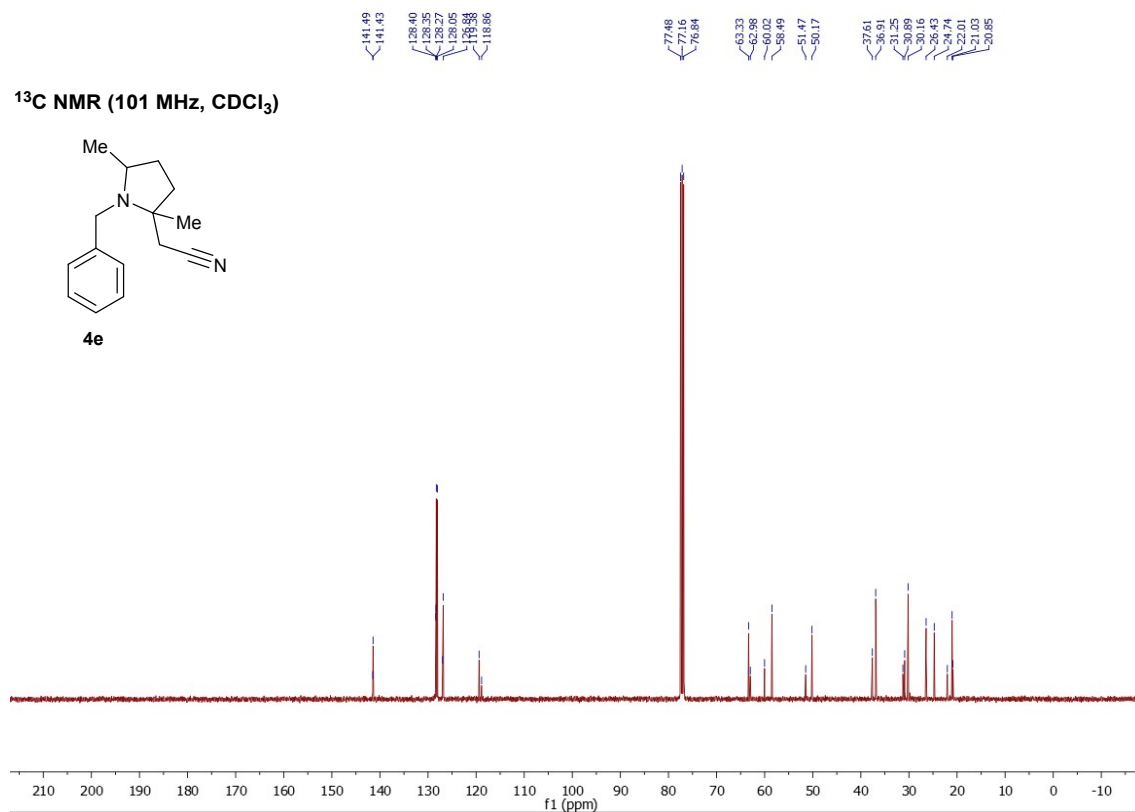



**<sup>1</sup>H NMR (400 MHz, CDCl<sub>3</sub>)**

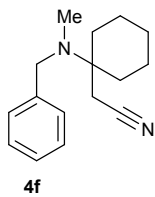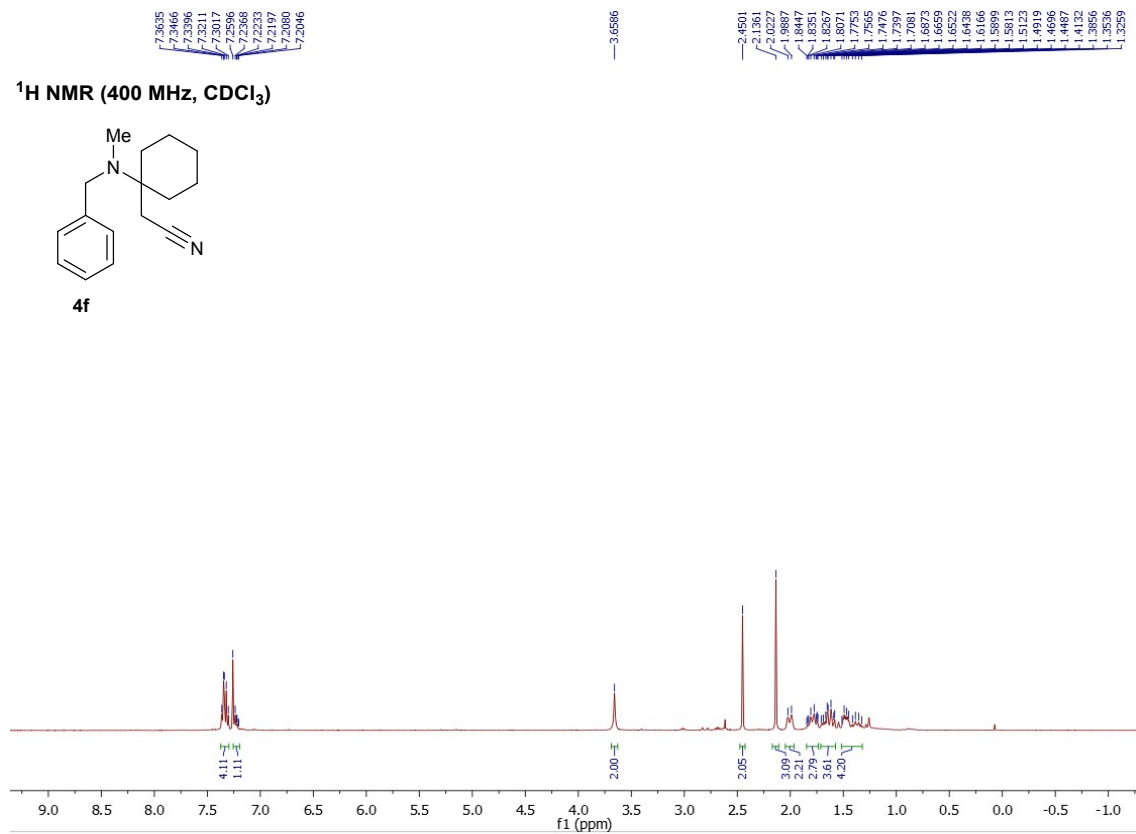

**<sup>13</sup>C NMR (101 MHz, CDCl<sub>3</sub>)**

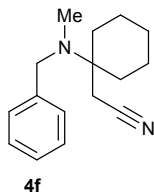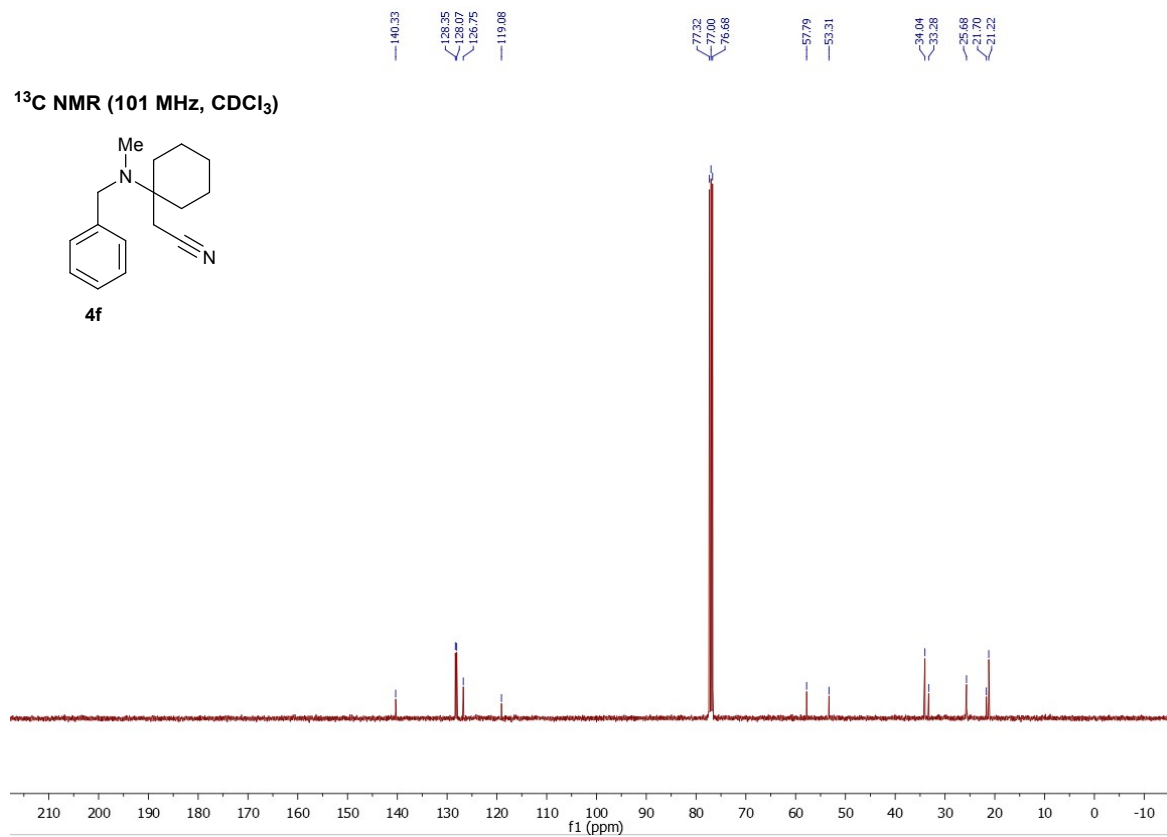

**<sup>1</sup>H NMR (400 MHz, CDCl<sub>3</sub>)**

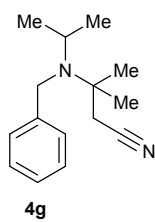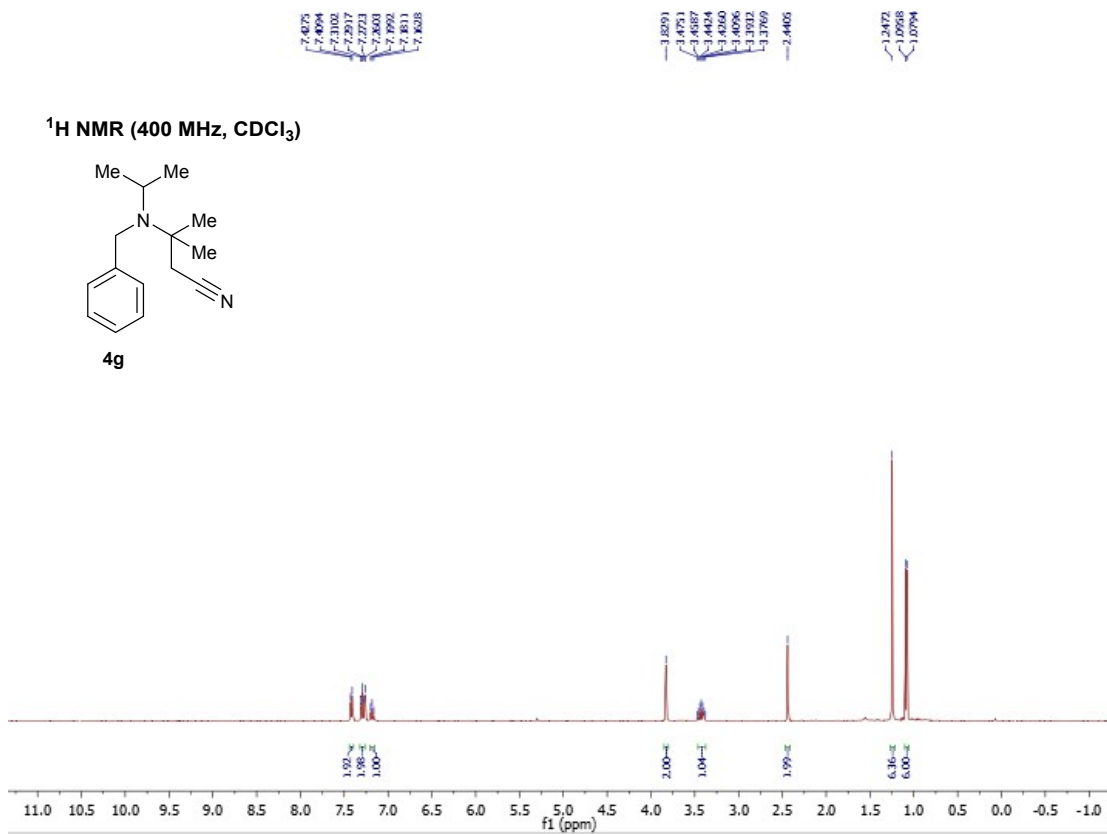

**<sup>13</sup>C NMR (101 MHz, CDCl<sub>3</sub>)**

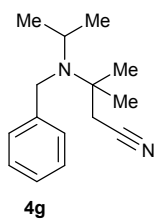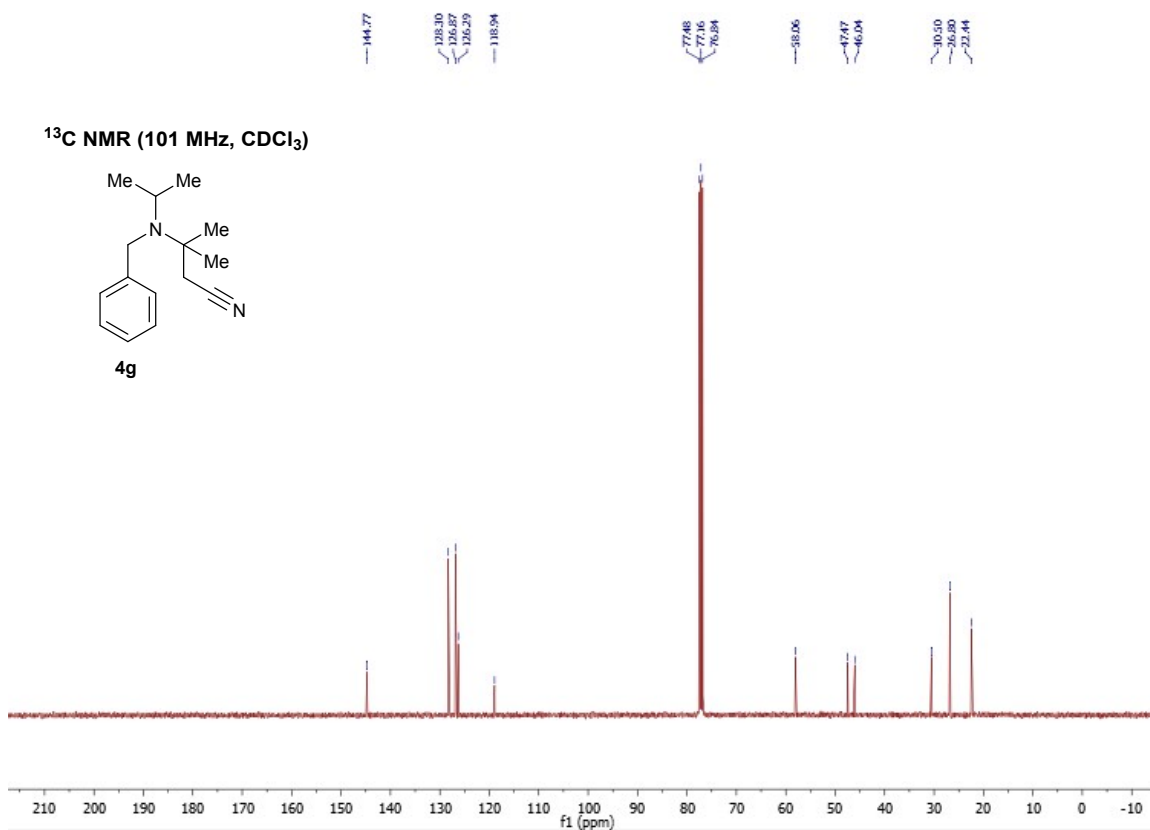

7.4651  
7.4475  
7.3839  
7.3676  
7.3067  
7.2604  
7.2510  
7.2328  
7.2145

3.8666

2.3258  
2.3166  
1.0684  
1.0616  
1.0537  
1.0466  
1.0405  
1.0321  
1.0254  
0.9592  
0.9534  
0.9424  
0.9381  
0.9326  
0.9124  
0.9068  
0.8982  
0.8881  
0.8848  
0.8703  
0.8630  
0.8491  
0.8425  
0.8365  
0.8220  
0.8119  
0.8051  
0.8001

**<sup>1</sup>H NMR (400 MHz, CDCl<sub>3</sub>)**

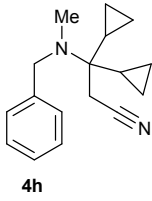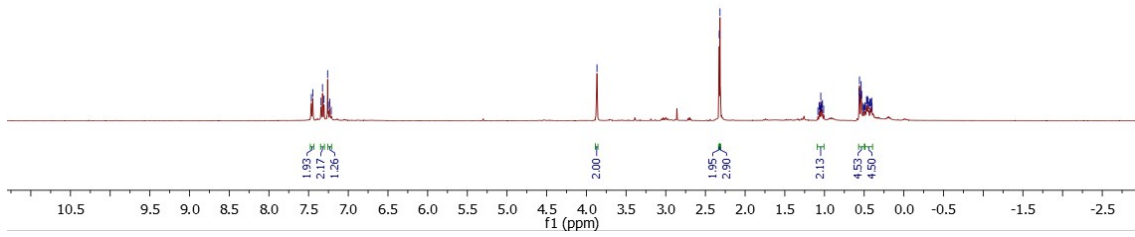

140.81  
128.43  
128.37  
126.85  
118.39  
77.48  
77.16  
76.84  
59.10  
55.35  
35.58  
23.69  
14.68  
1.89  
0.95

**<sup>13</sup>C NMR (101 MHz, CDCl<sub>3</sub>)**

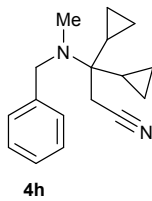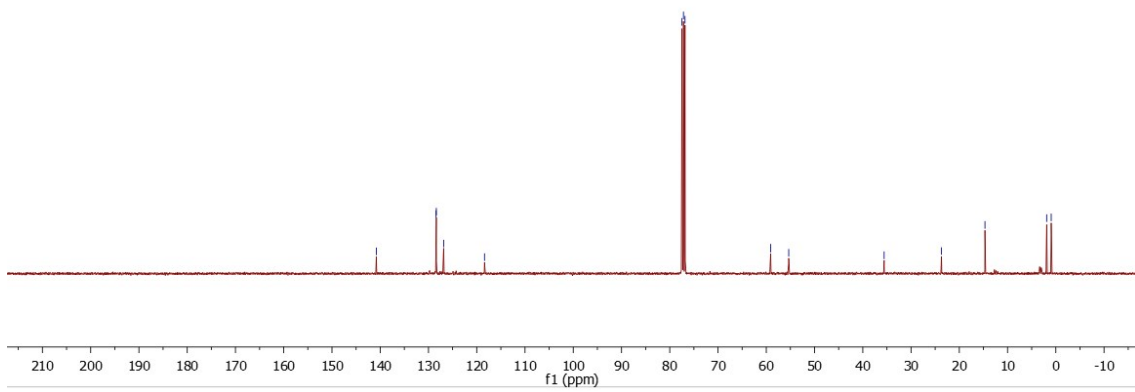

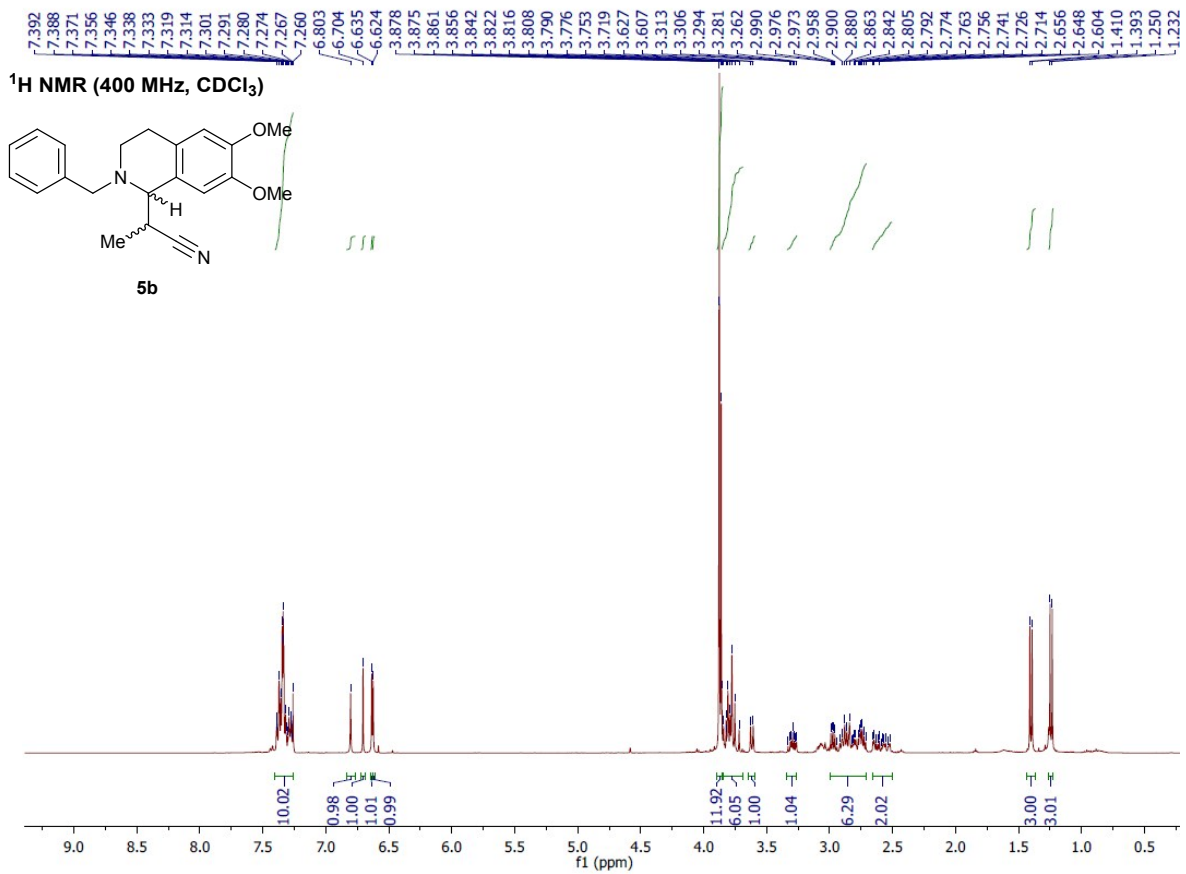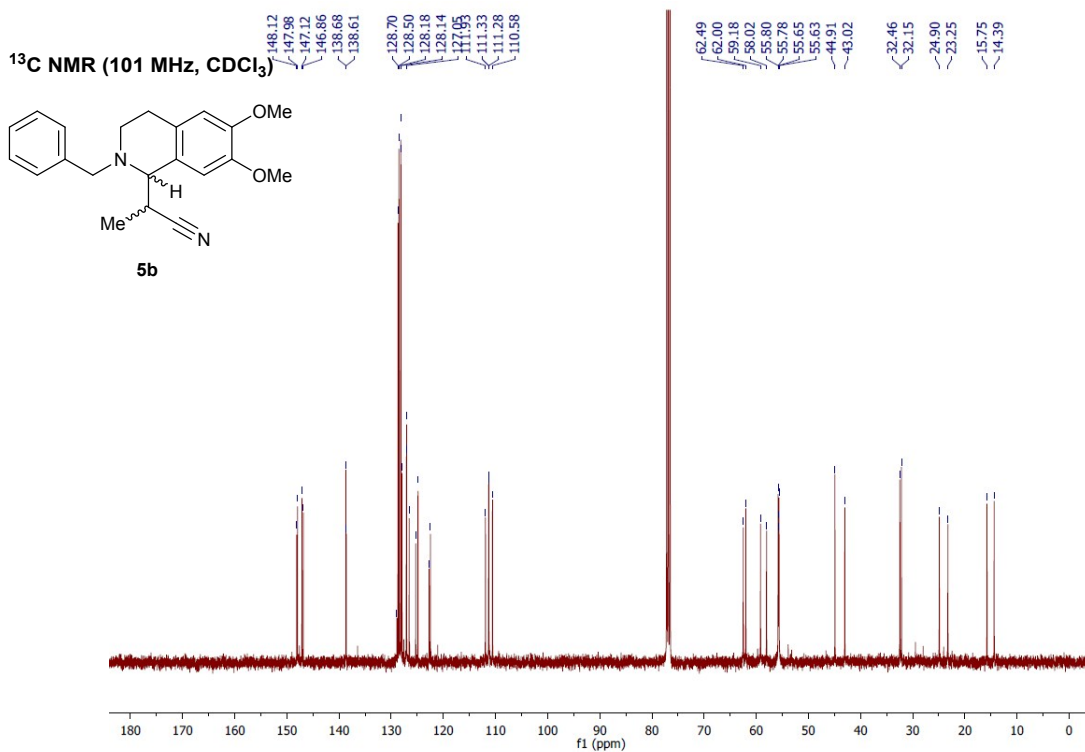

**<sup>1</sup>H NMR (400 MHz, CDCl<sub>3</sub>)**

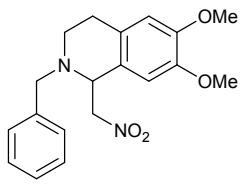

**6b**

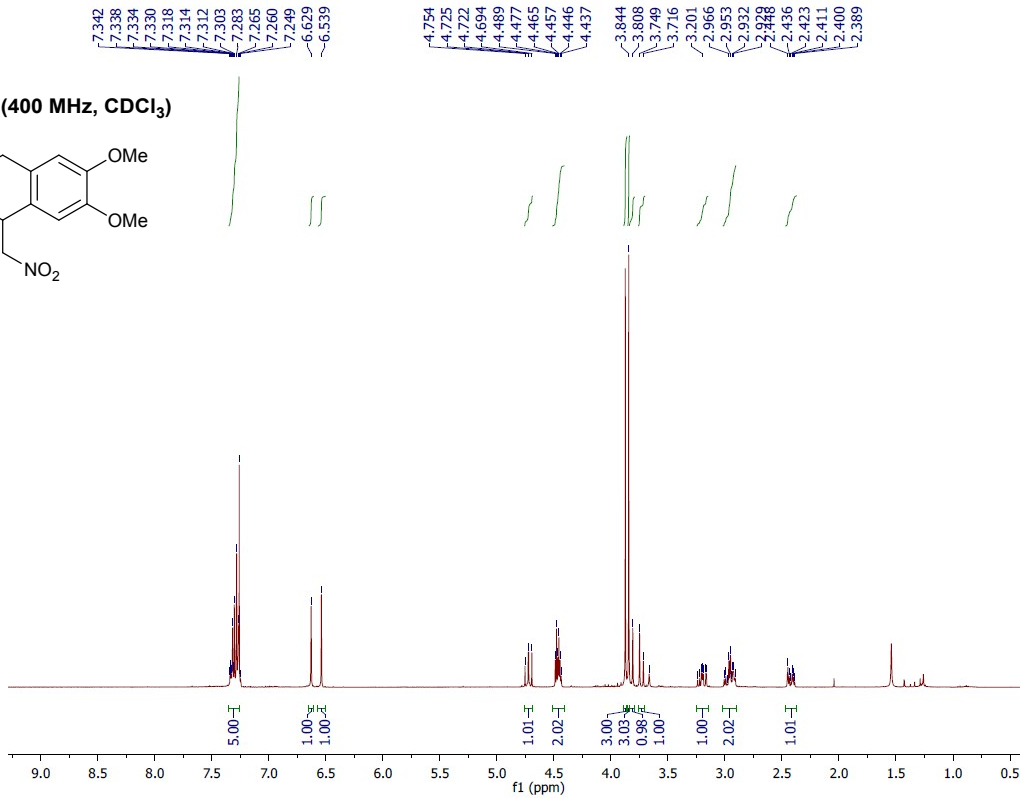

**<sup>13</sup>C NMR (101 MHz, CDCl<sub>3</sub>)**

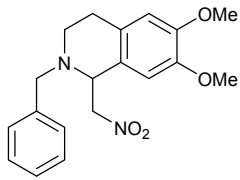

**6b**

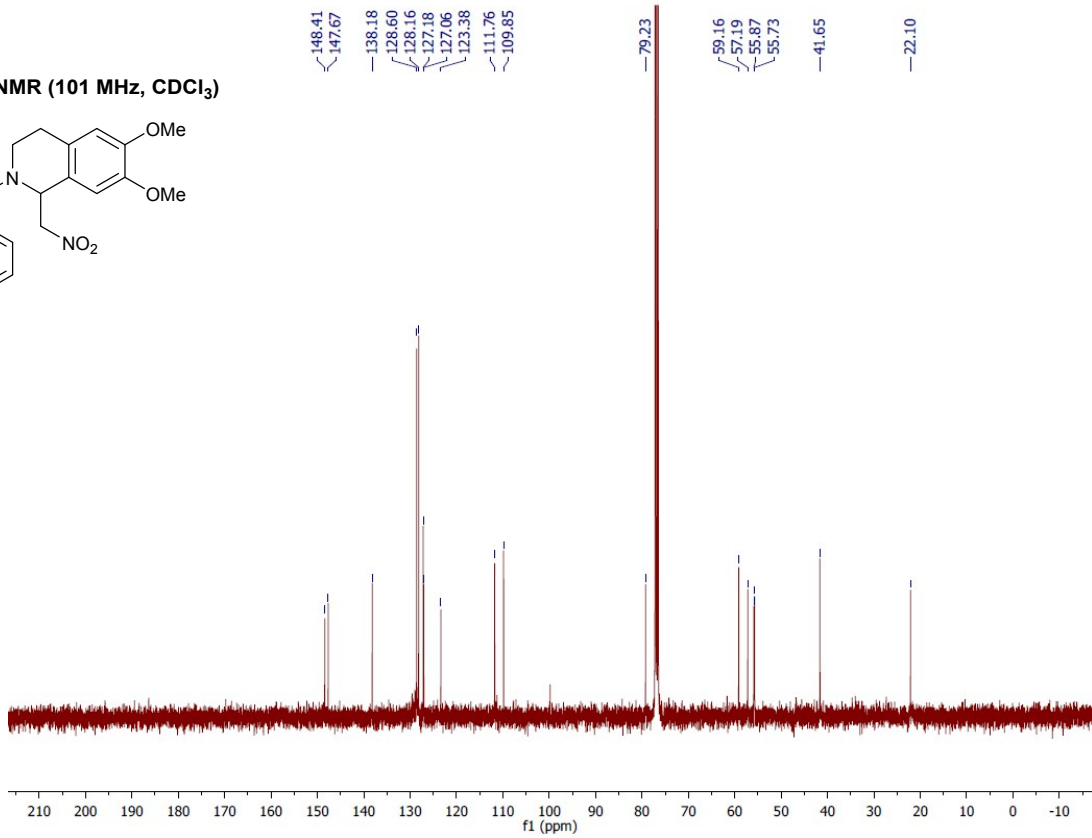

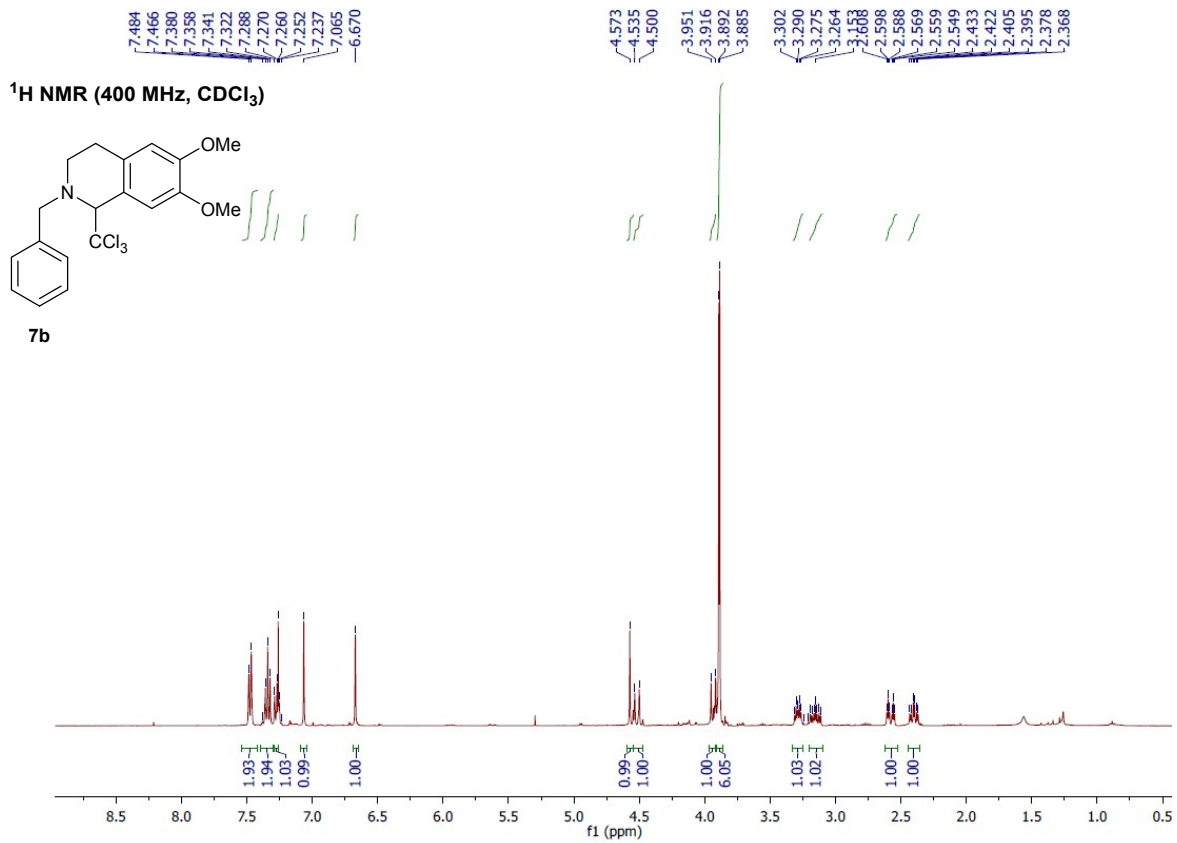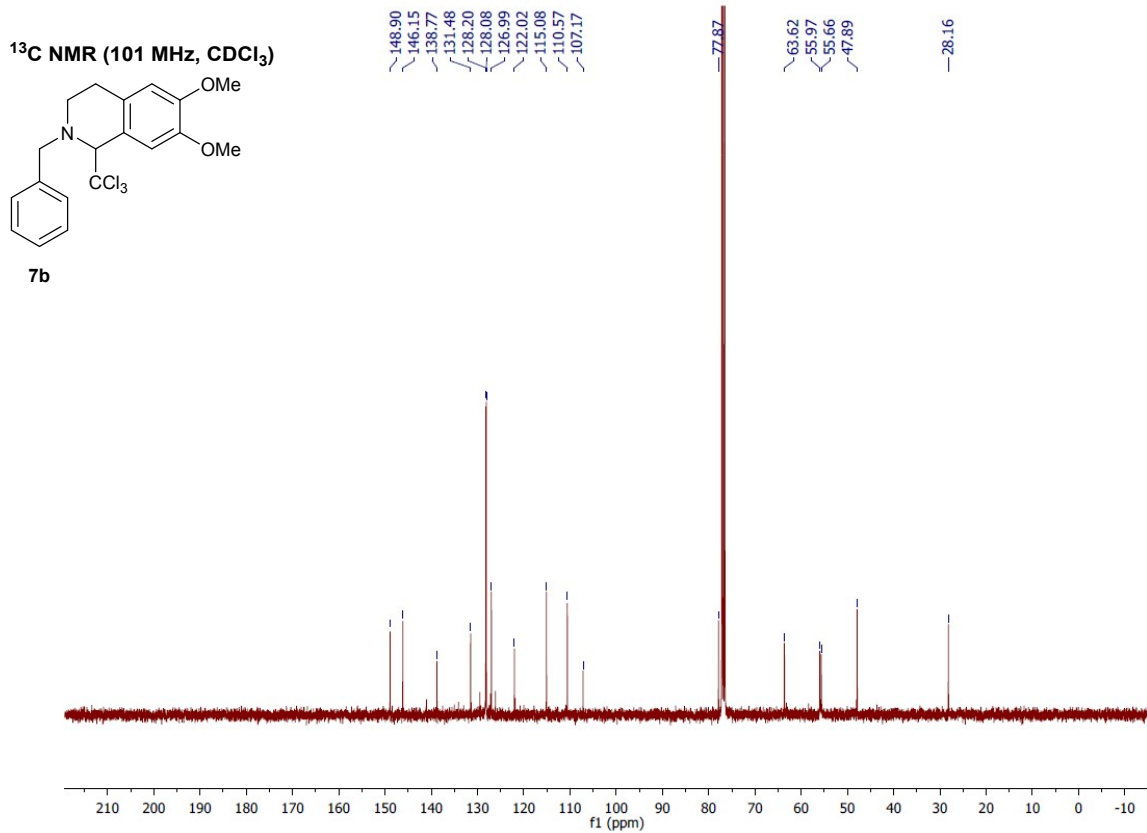

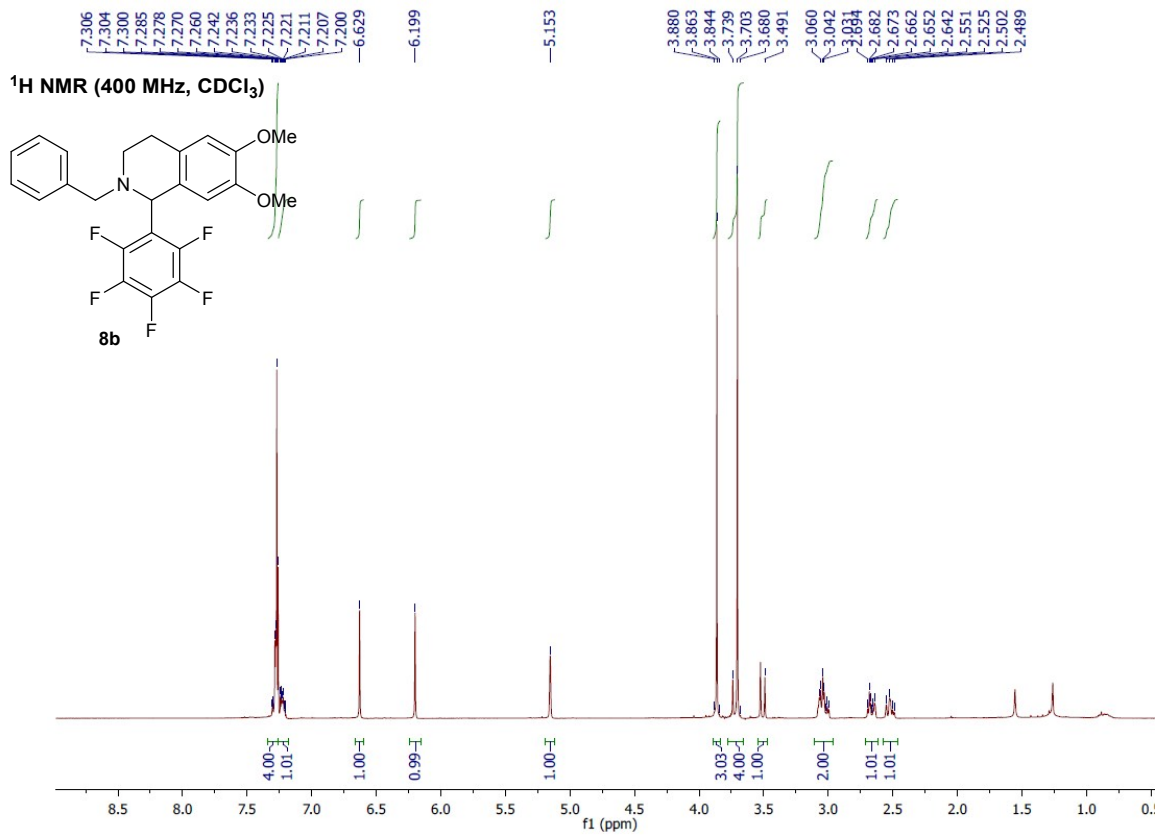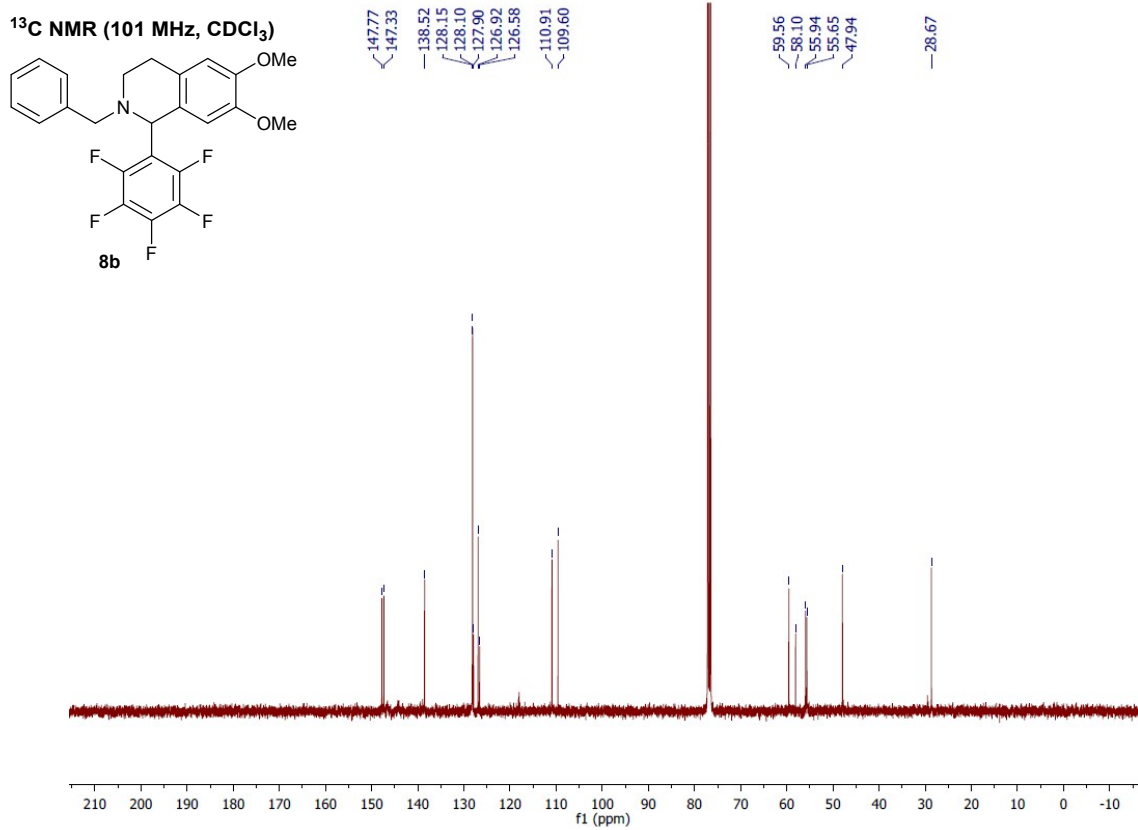





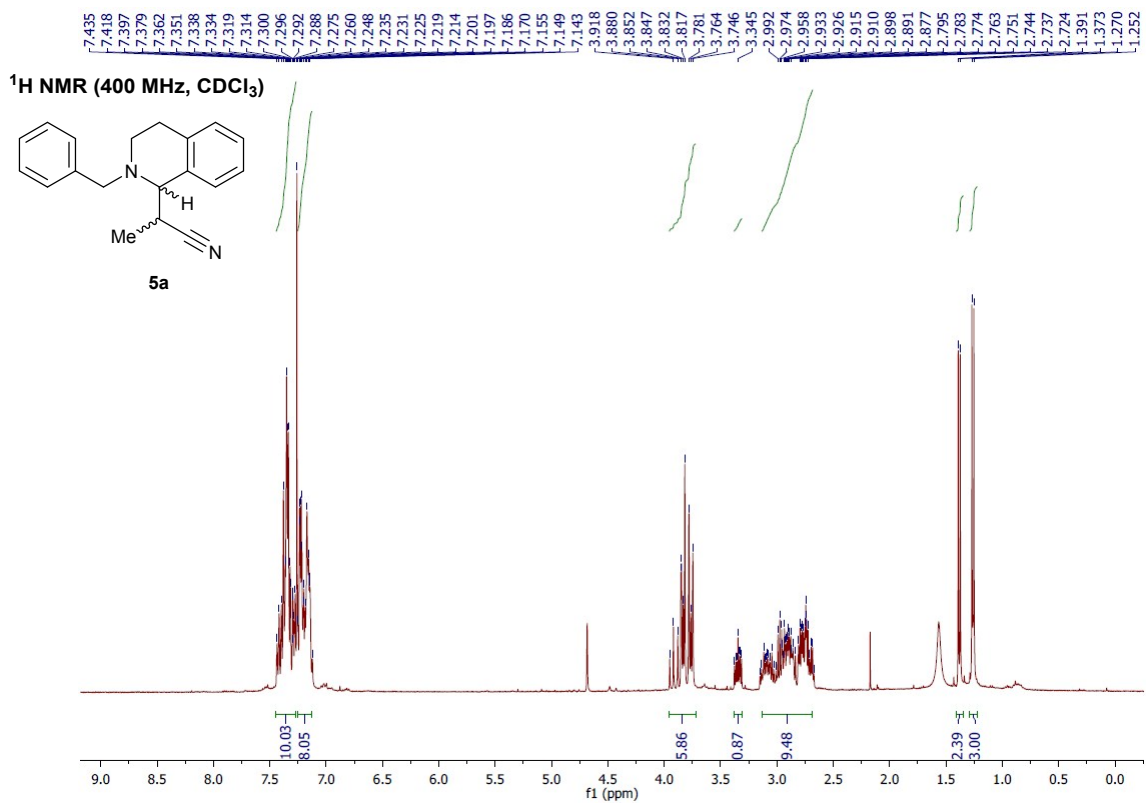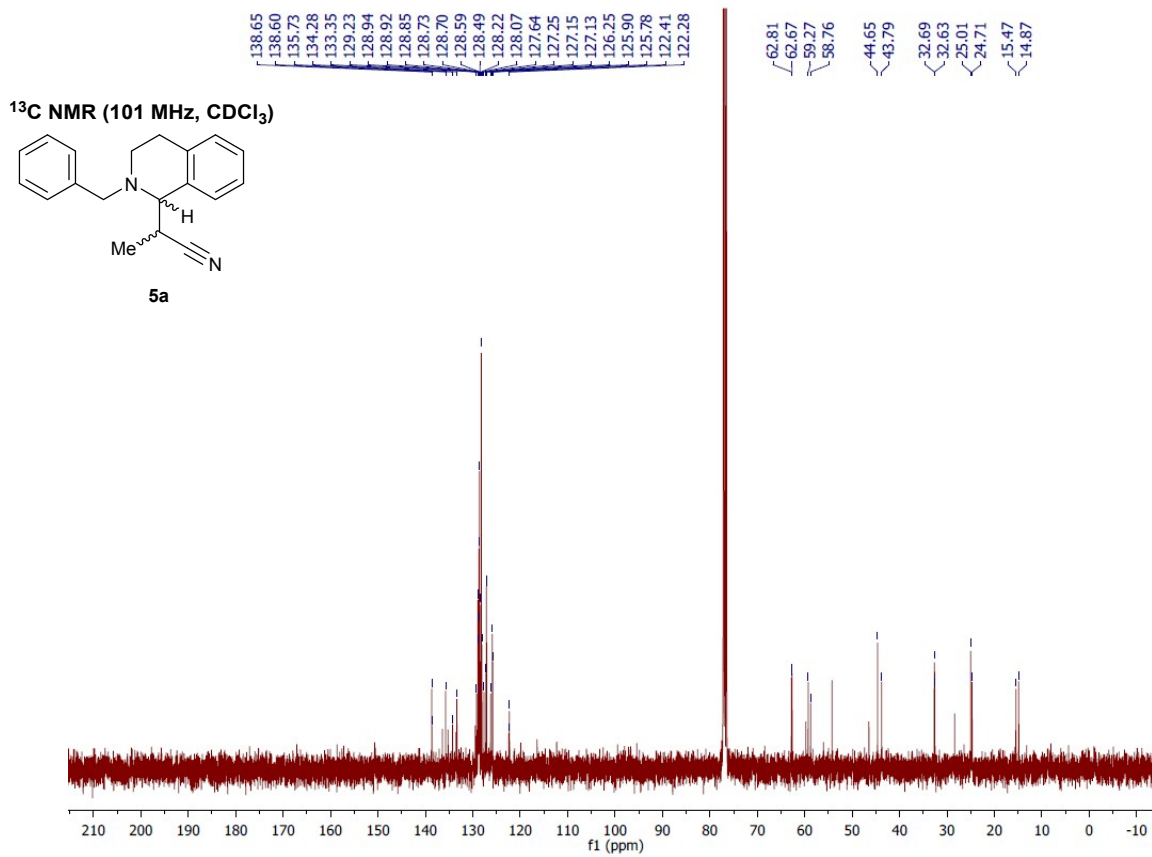

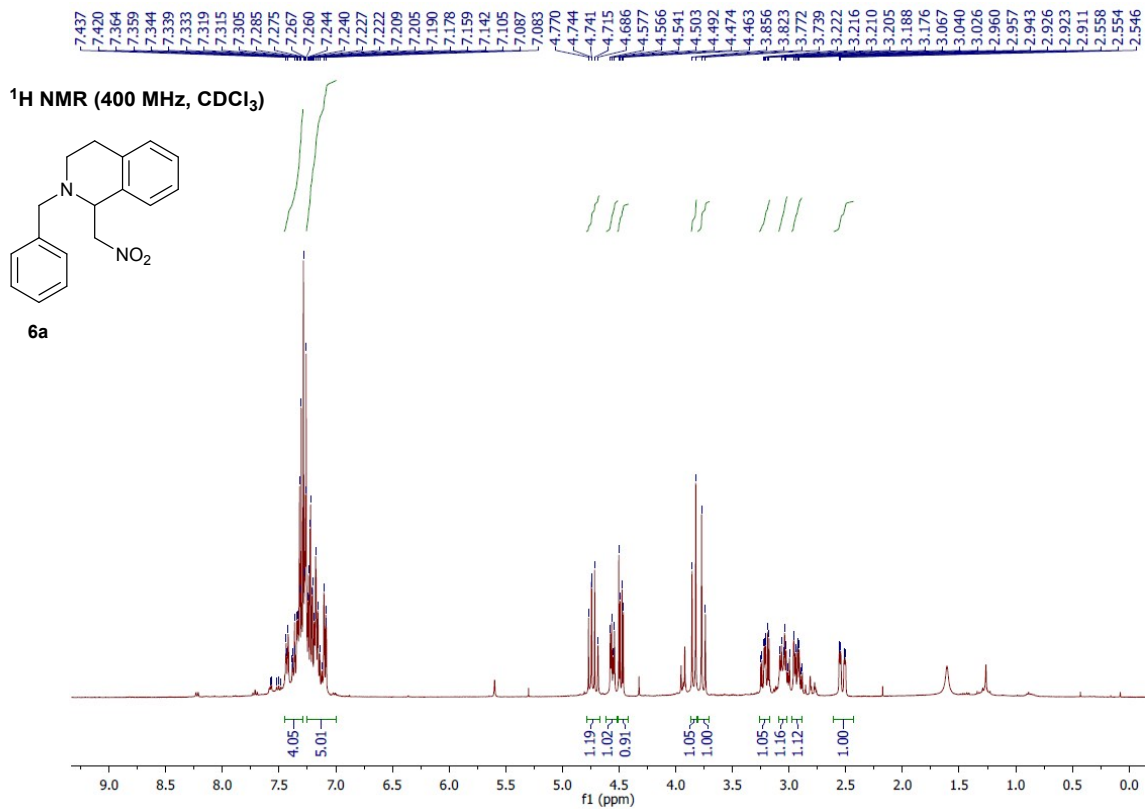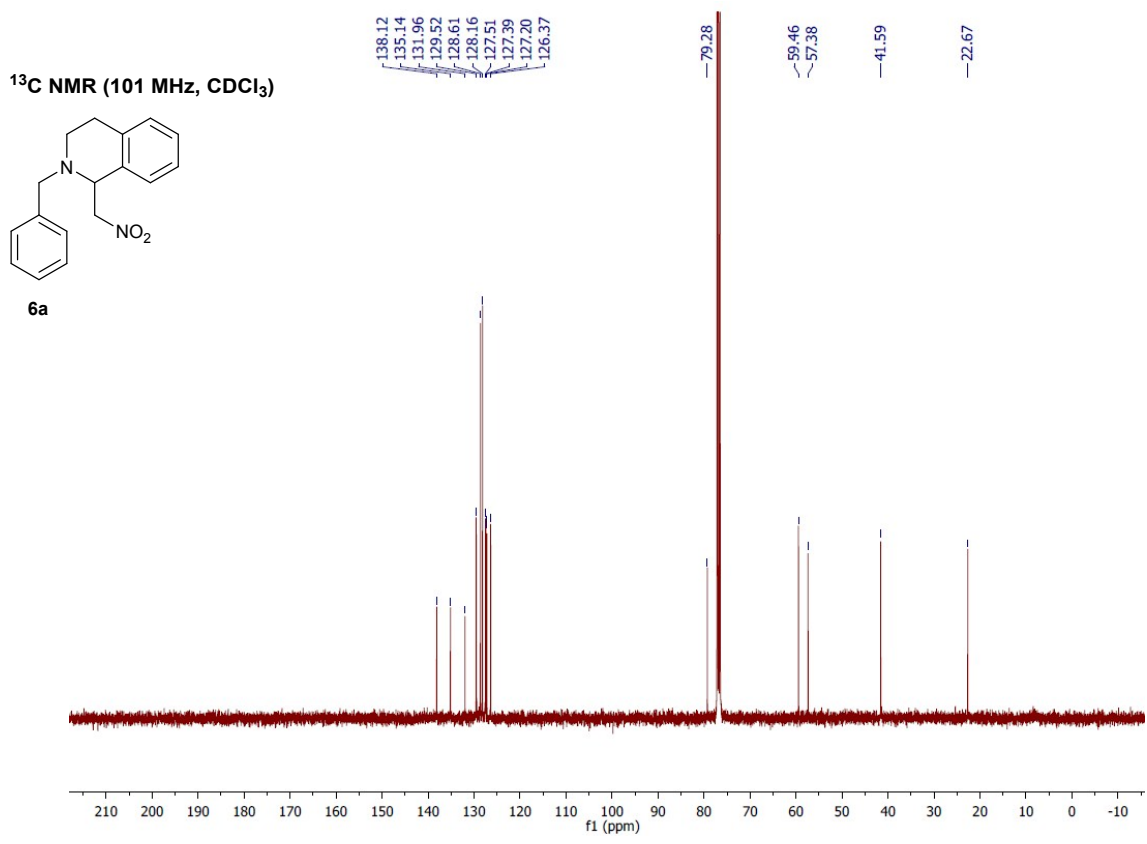

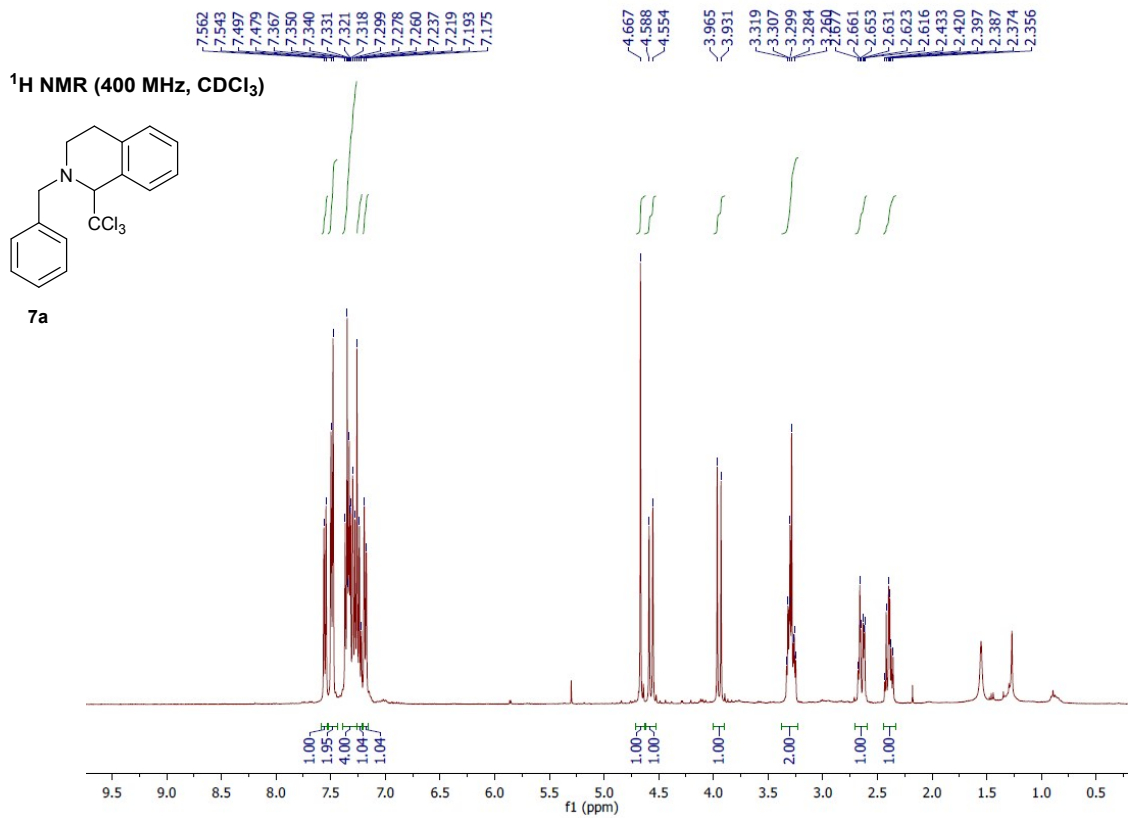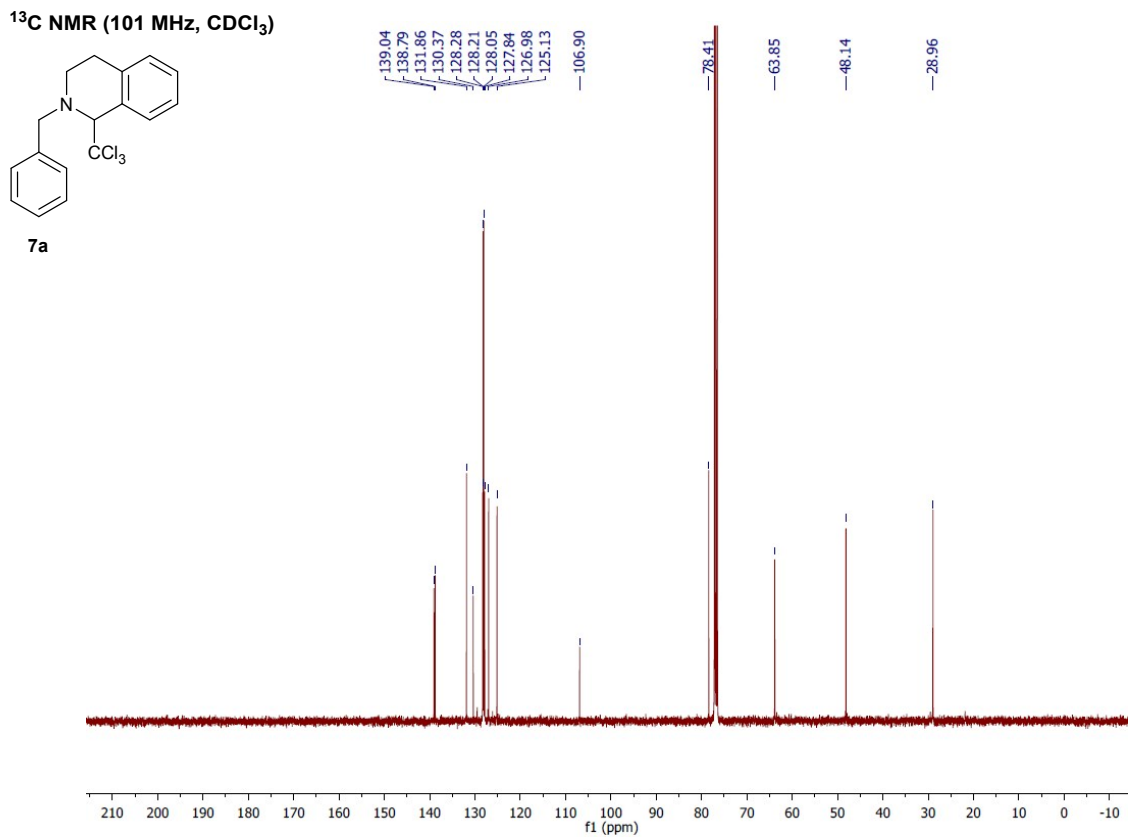

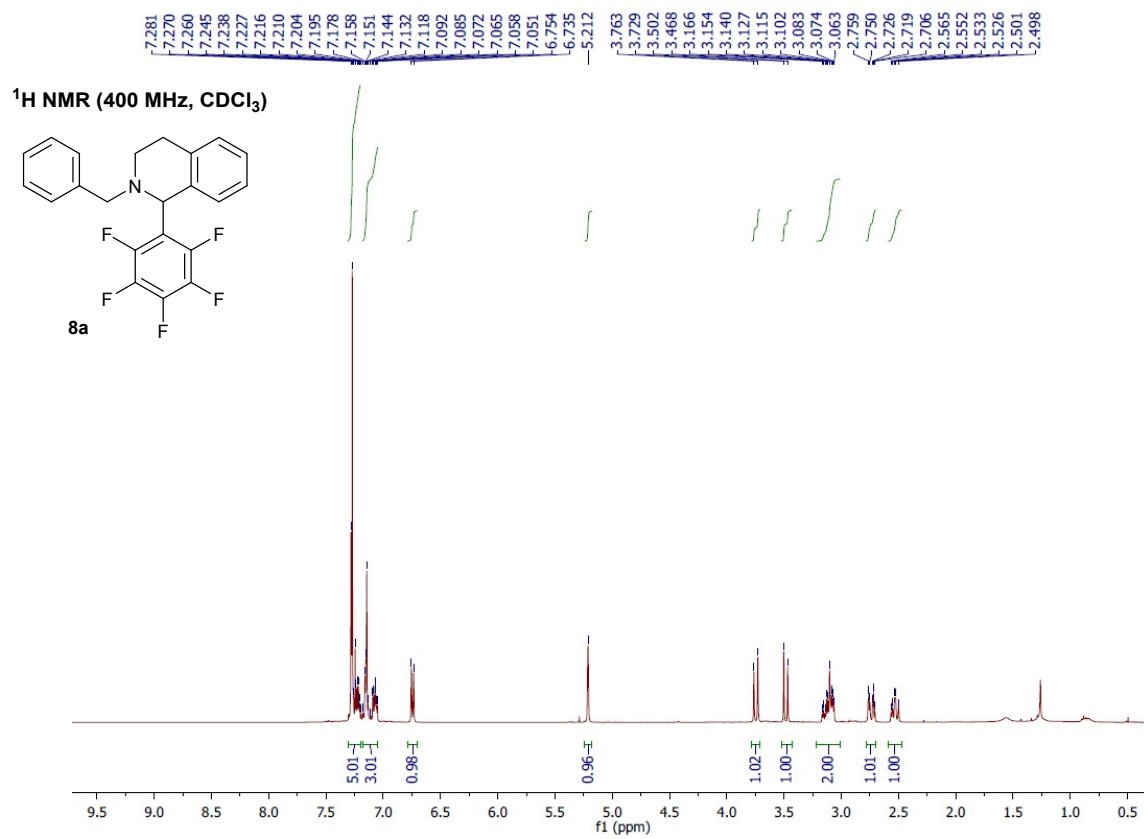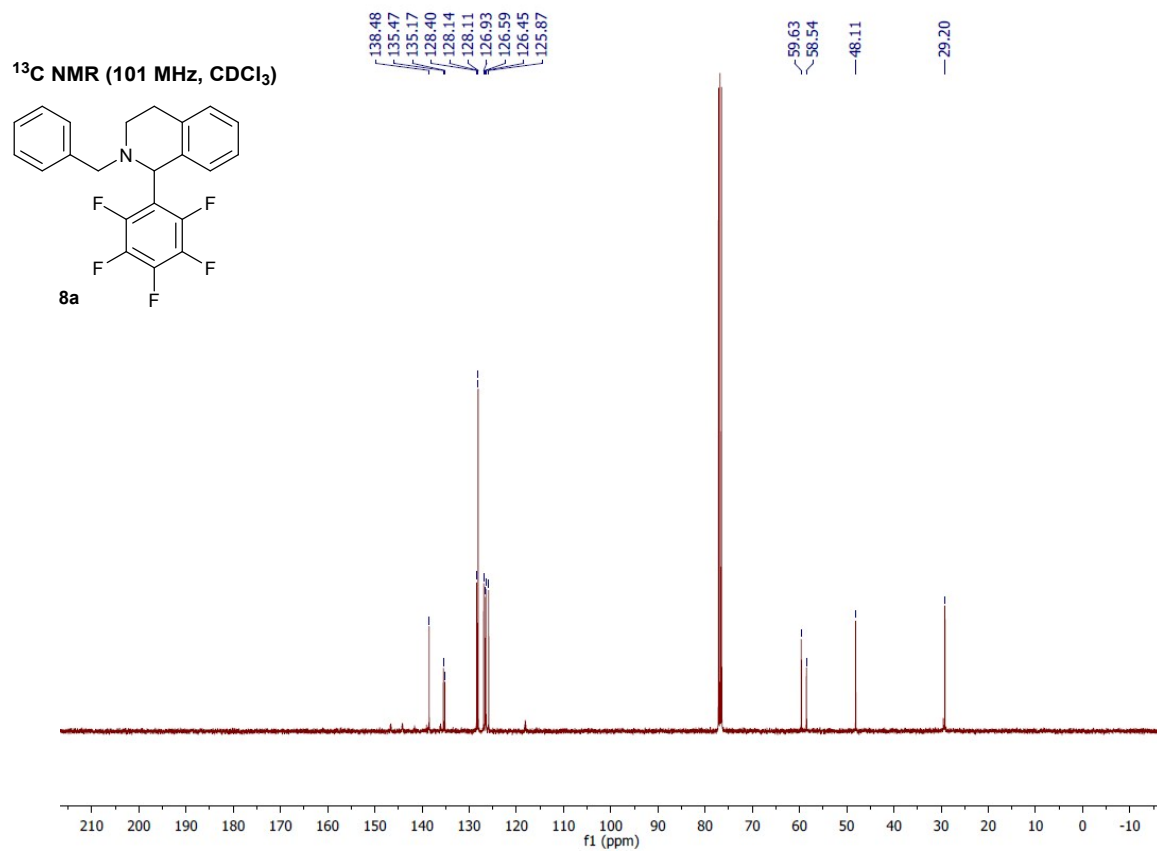

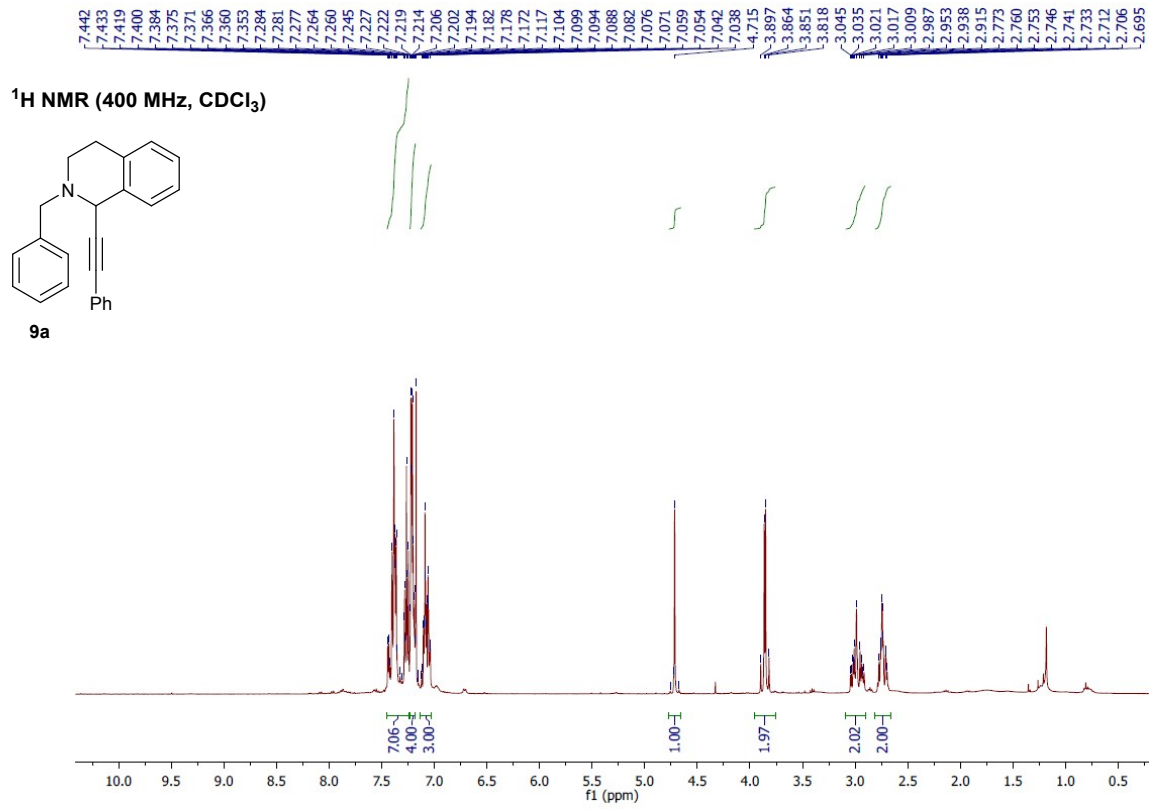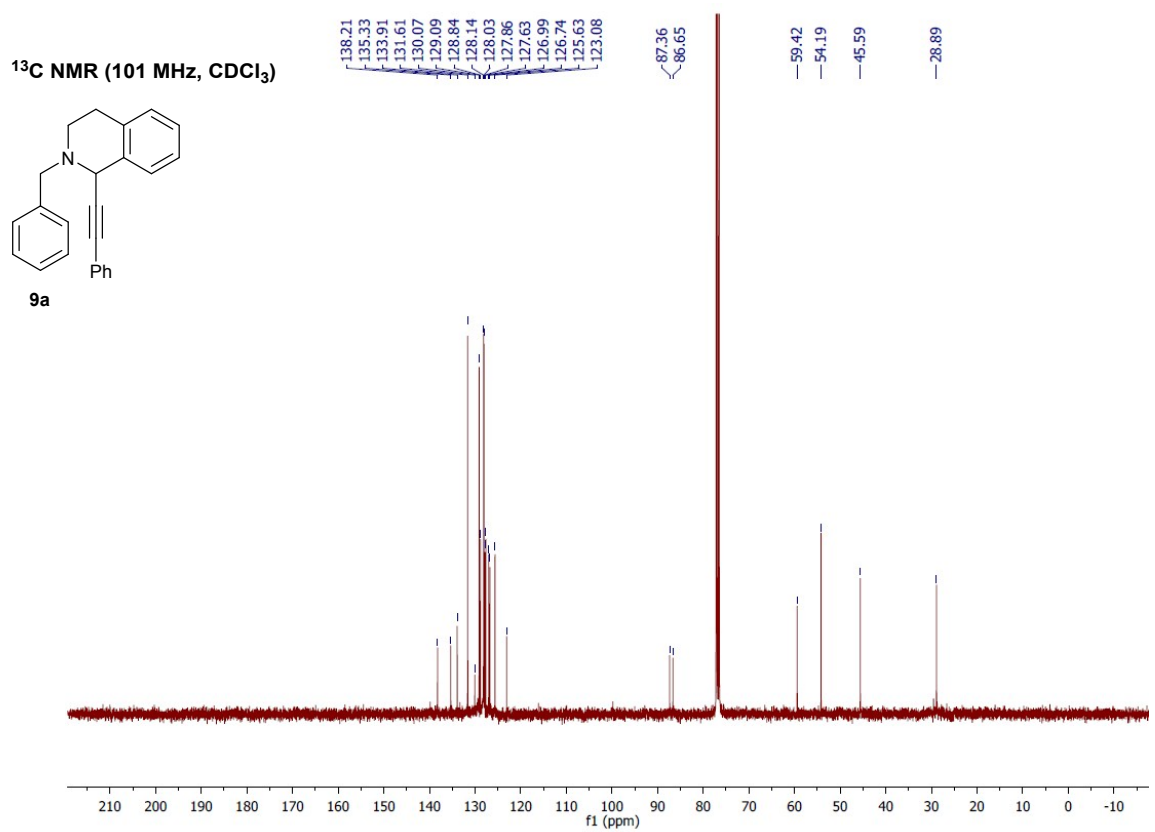

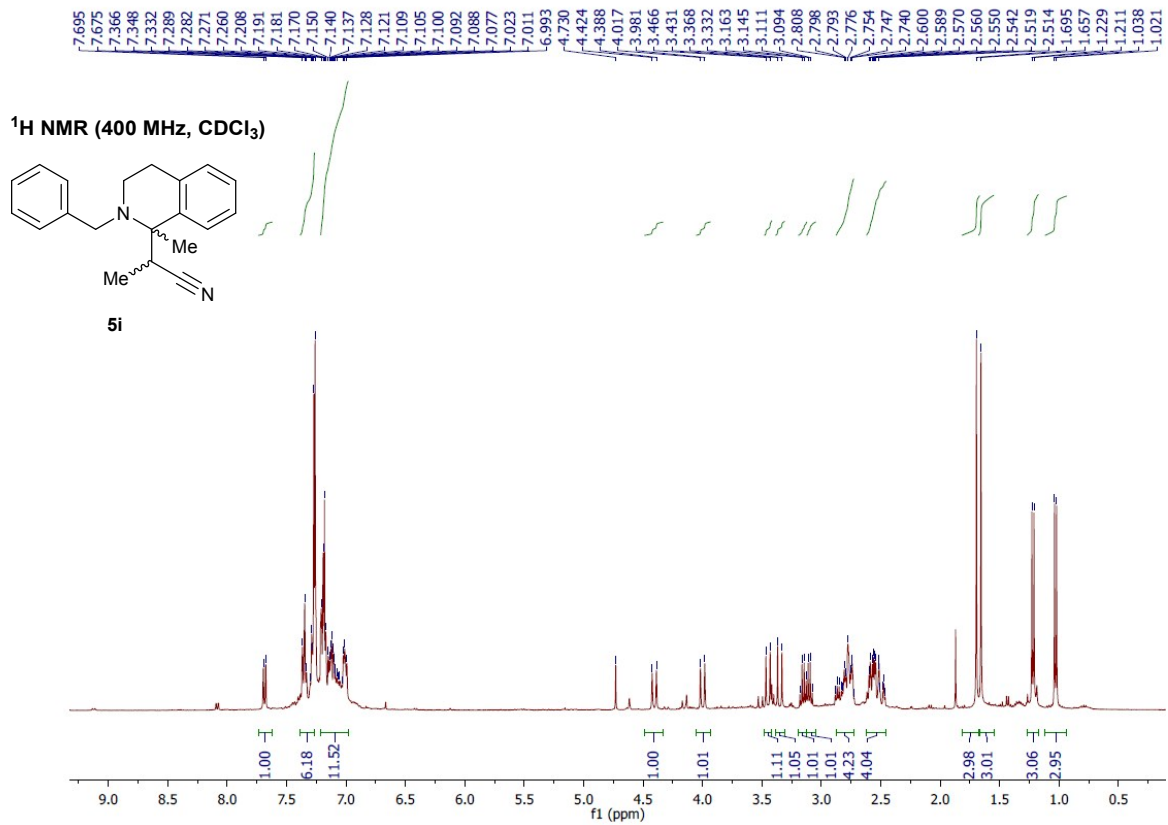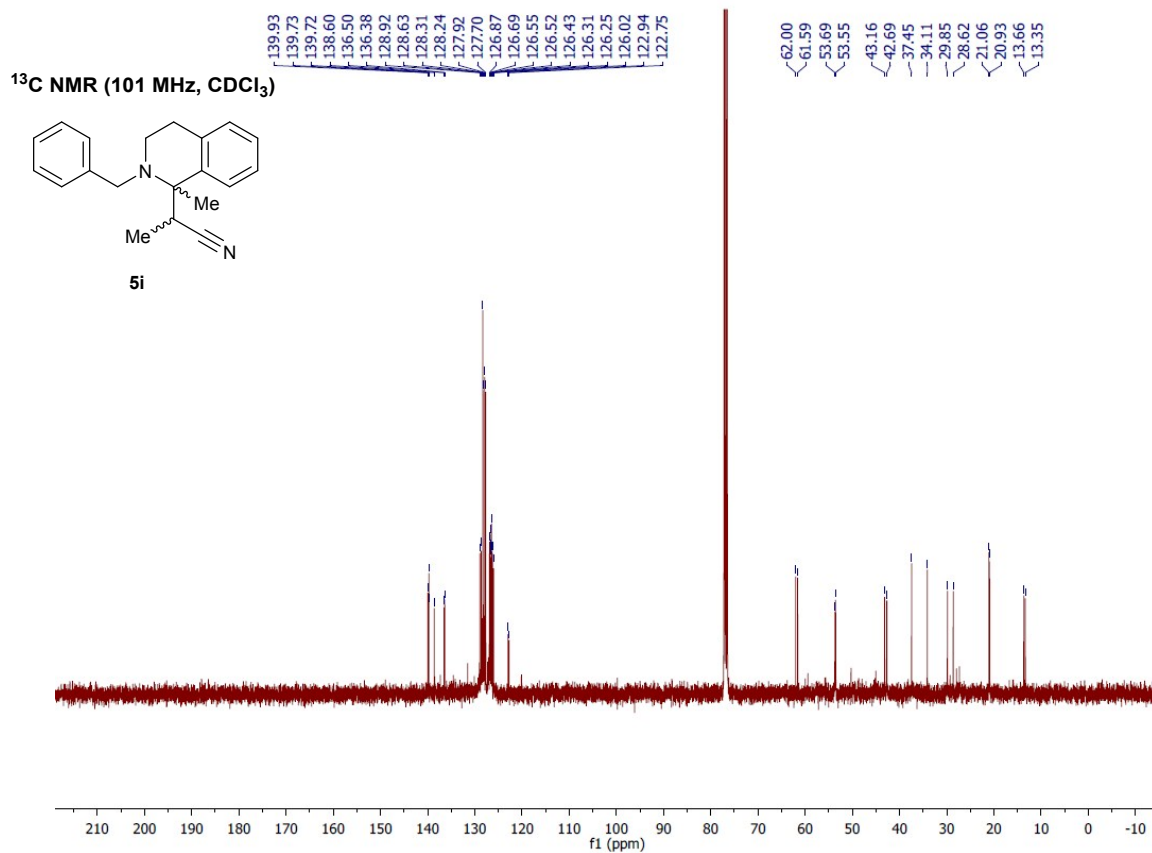

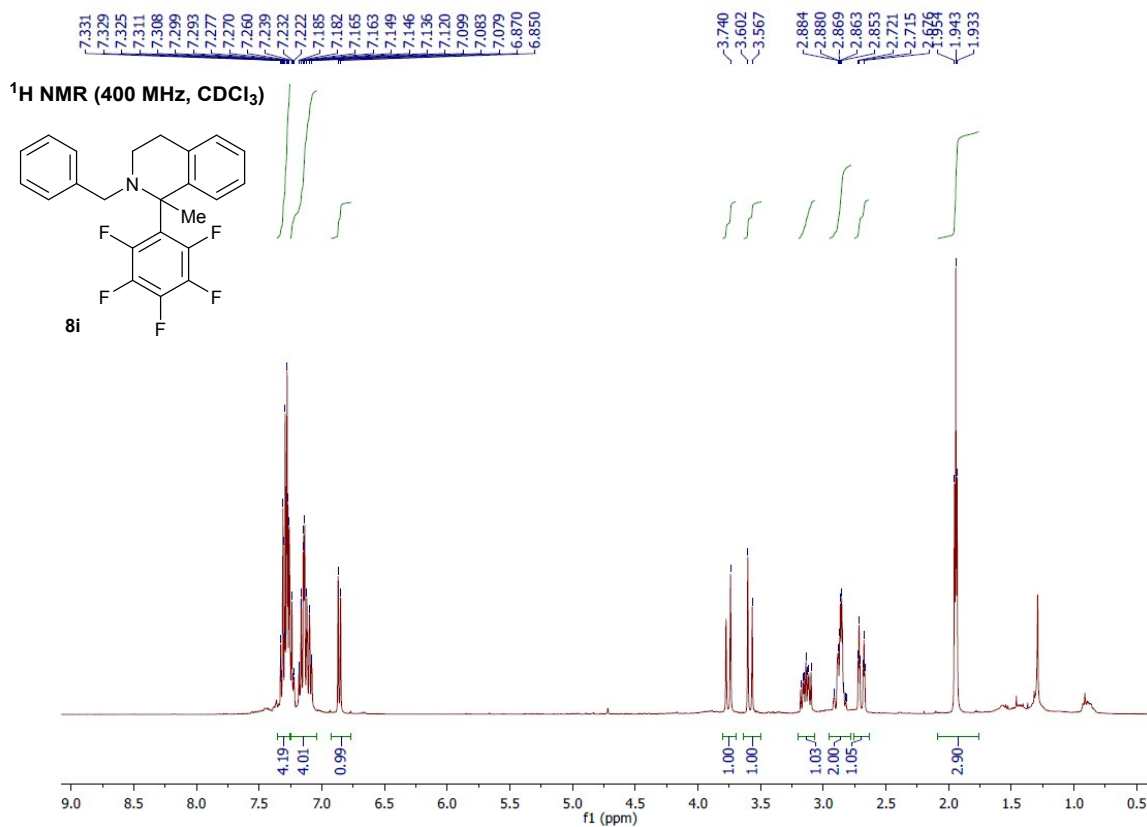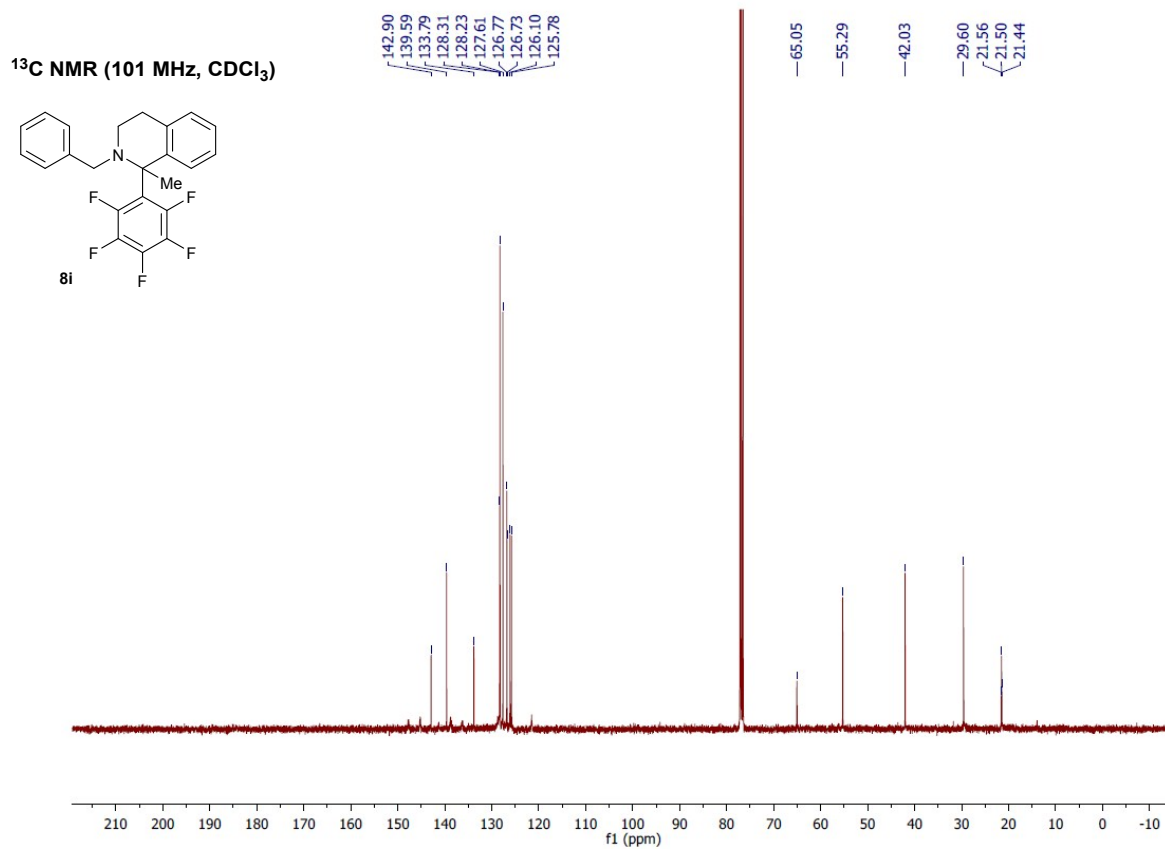

**<sup>1</sup>H NMR (400 MHz, CDCl<sub>3</sub>)**

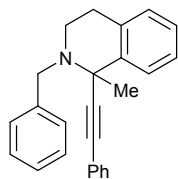

**9i**

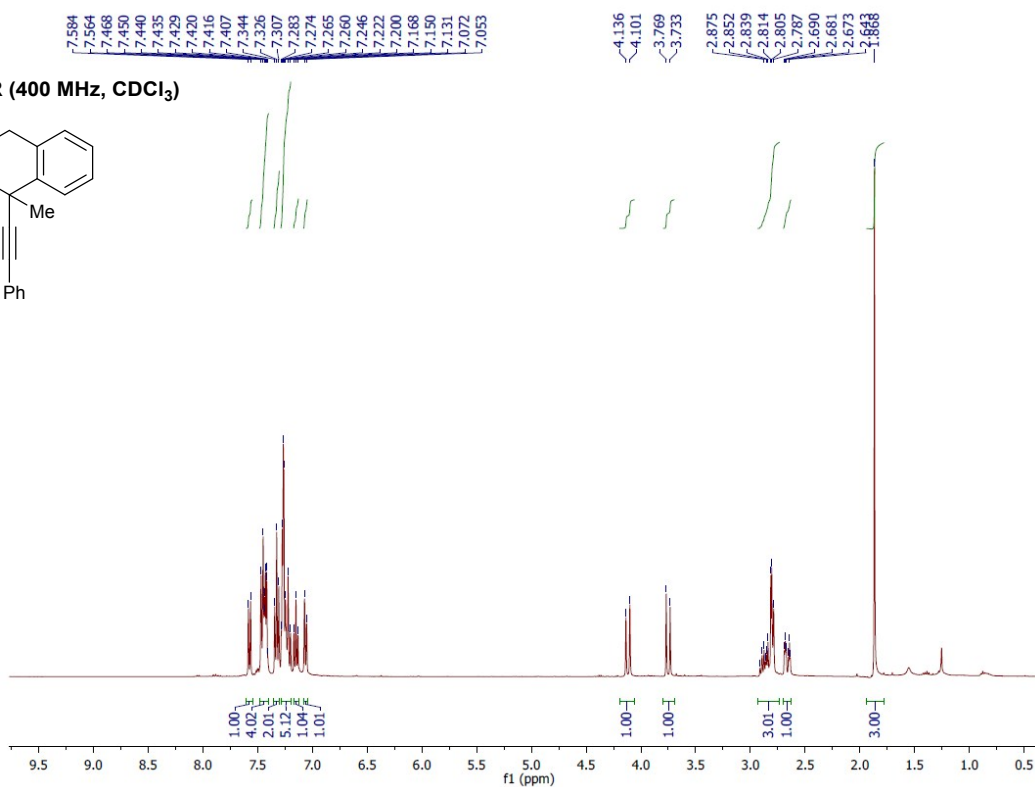

**<sup>13</sup>C NMR (101 MHz, CDCl<sub>3</sub>)**

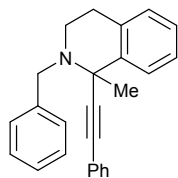

**9i**

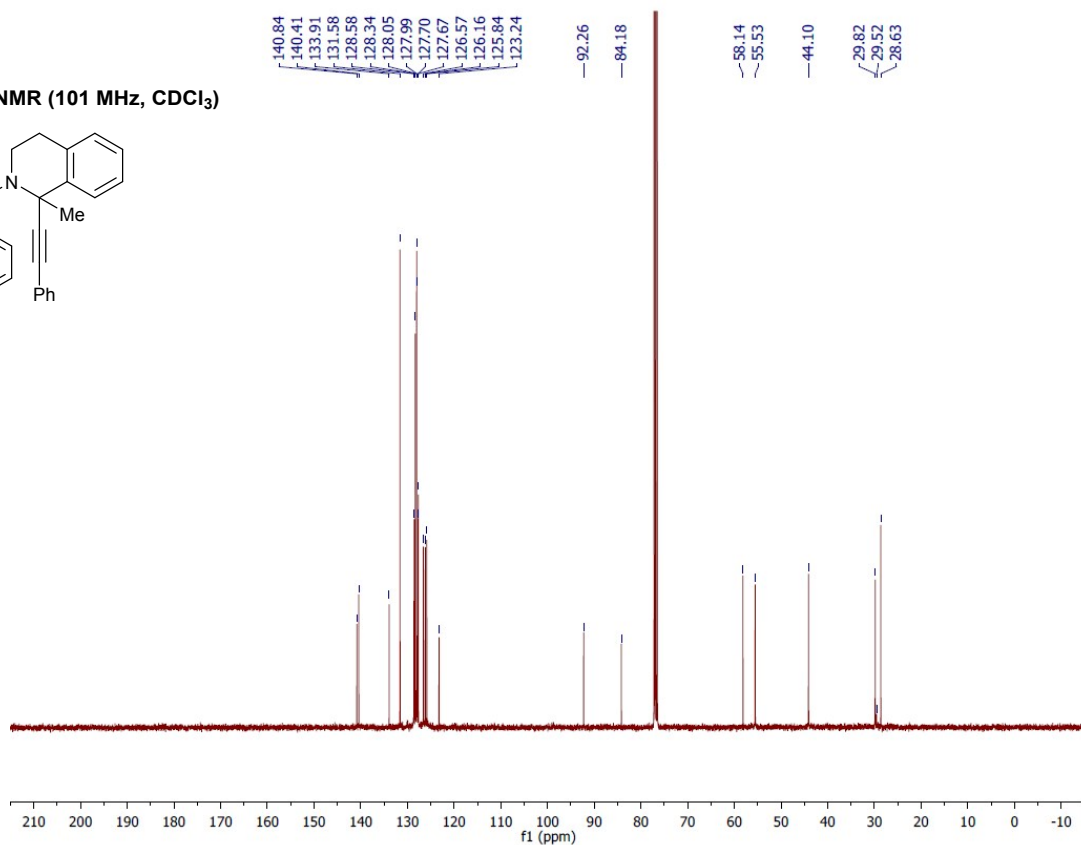



7.4719  
7.4662  
7.4569  
7.3970  
7.3865  
7.3785  
7.3699  
7.3584  
7.3202  
7.3019  
7.2600  
7.2458  
7.2409  
7.2318  
7.2238  
7.2171  
7.2142  
7.1985  
7.1846  
7.1774  
7.1701  
7.1670  
7.1625  
7.1293  
7.1135  
7.1071

4.0923  
3.8966  
3.8628  
3.8400  
3.8101  
3.7852  
3.1844  
3.1727  
3.1635  
3.1613  
3.1521  
3.1414  
3.1288  
2.9981  
2.9852  
2.9748  
2.9578  
2.9448  
2.9348  
2.9213  
2.8927  
2.8819  
2.8698  
2.8615  
2.8496  
2.8378  
2.7619  
2.7503  
2.7397  
2.7287  
2.7086  
2.6993

**<sup>1</sup>H NMR (400 MHz, CDCl<sub>3</sub>)**

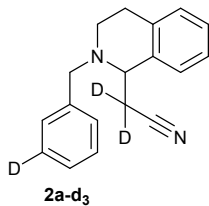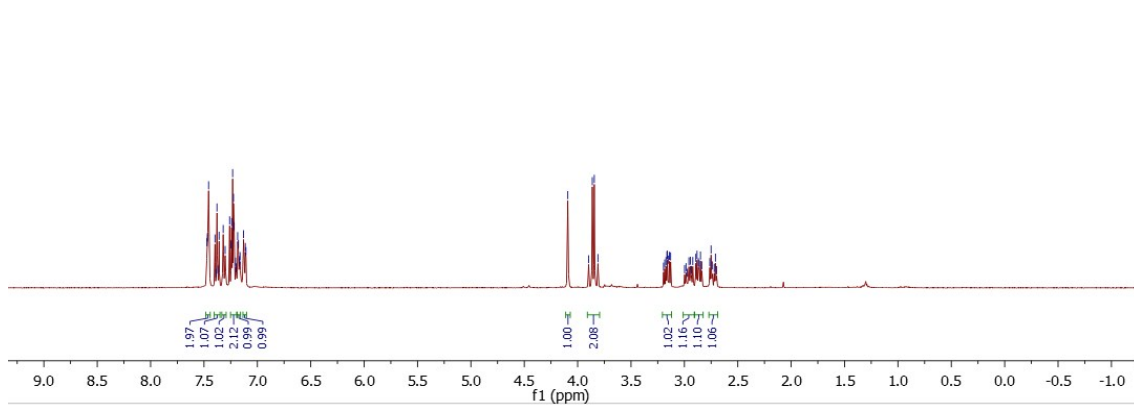

**<sup>13</sup>C NMR (101 MHz, CDCl<sub>3</sub>)**

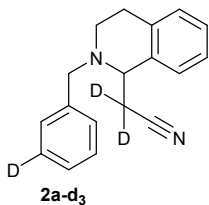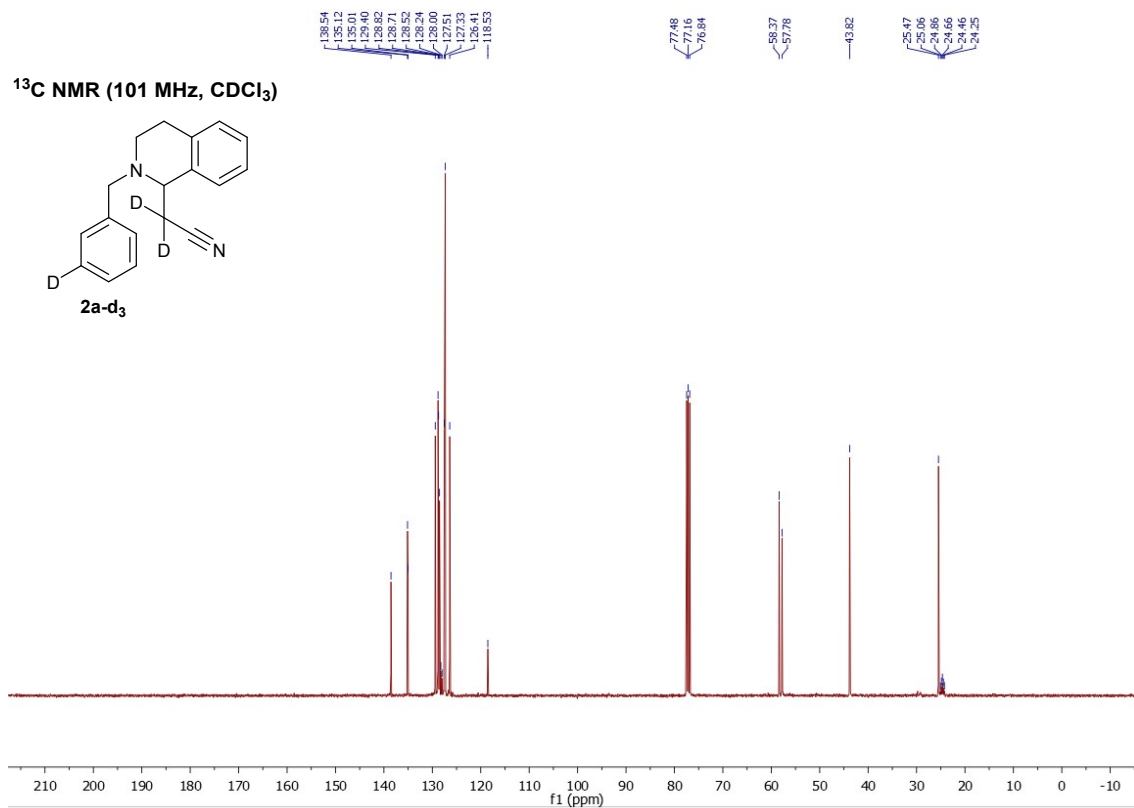

7.4446  
7.4360  
7.3762  
7.3720  
7.3549  
7.3483  
7.3452  
7.3386  
7.3099  
7.3071  
7.2926  
7.2738  
7.2712  
7.2602  
7.2454  
7.2411  
7.2273  
7.2225  
7.2129  
7.2054  
7.1999  
7.1849  
7.1791  
7.1650  
7.1585  
7.1471  
7.1435  
7.1147  
7.0984  
7.0924

3.8761  
3.8420  
3.8347  
3.8007  
3.1866  
3.1793  
3.1536  
3.1536  
3.1437  
3.1325  
3.1198  
2.9910  
2.9778  
2.9672  
2.9510  
2.9344  
2.9185  
2.8989  
2.8795  
2.8468  
2.8292  
2.7867  
2.7198  
2.6622  
2.6780

**<sup>1</sup>H NMR (400 MHz, CDCl<sub>3</sub>)**

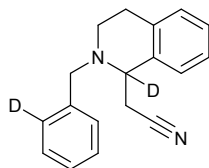

**2a-d<sub>2</sub>**

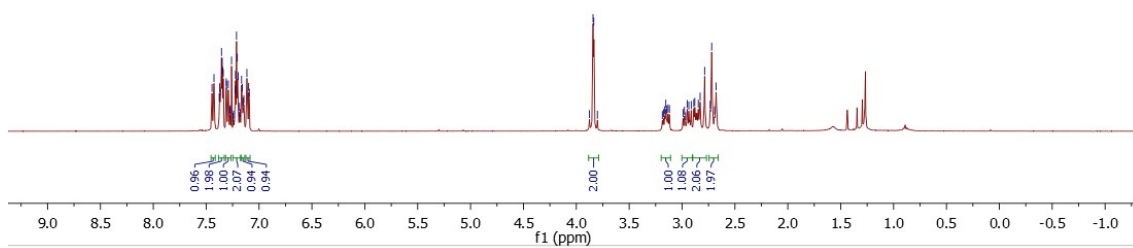

138.49  
135.14  
135.00  
133.88  
133.88  
128.59  
128.48  
127.60  
127.42  
126.48  
118.60  
77.48  
77.16  
76.84  
58.31  
57.54  
57.31  
43.76  
25.40  
25.05

**<sup>13</sup>C NMR (101 MHz, CDCl<sub>3</sub>)**

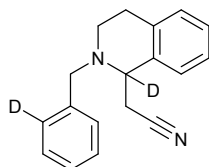

**2a-d<sub>2</sub>**

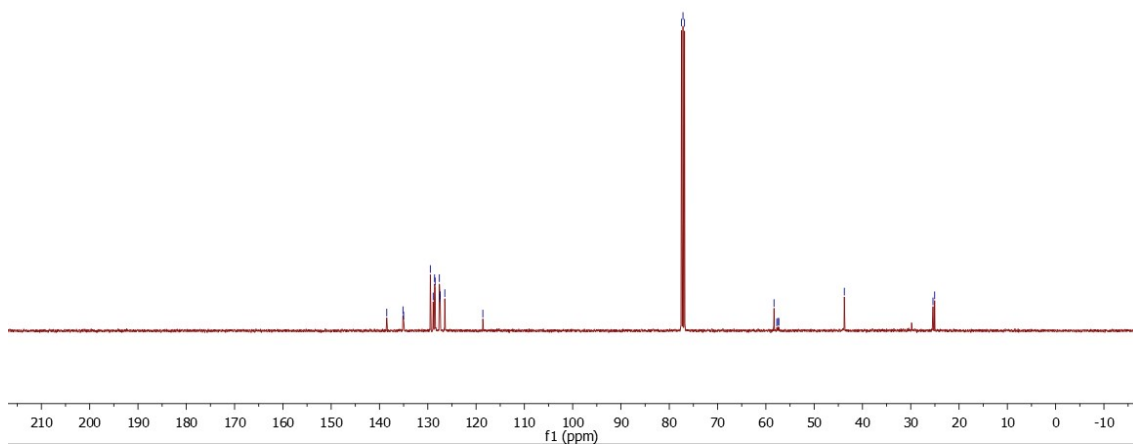

Supplement: SC-009-C8SC00181B-s001.pdf [file SC-009-C8SC00181B-s001.pdf]
